# Supplementary material
Source: PubMed Central journal article supplement (PMC8599849)

## **SUPPLEMENTARY APPENDIX**

Supplement to Marzinke, et al., Characterization of HIV infection in cisgender men and transgender women who have sex with men receiving injectable cabotegravir for HIV prevention: HPTN 083. J Infectious Diseases (2021).

### **CONTENTS**

|                      |                                       |             |
|----------------------|---------------------------------------|-------------|
| Supplementary File 1 | HIV testing                           | Pages 2-5   |
| Supplementary File 2 | Assays used for retrospective testing | Pages 6-8   |
| Supplementary File 3 | Antiretroviral drug testing           | Pages 9-10  |
| Supplementary File 4 | HIV drug resistance                   | Pages 11-14 |
| Supplementary File 5 | Case summaries, CAB arm (groups A-D)  | Pages 15-31 |
| Supplementary File 6 | Case summaries, TDF/FTC arm (group E) | Pages 32-74 |

## **Supplementary File 1. HIV testing.**

### **HIV testing performed at study sites**

HIV testing was performed at study sites using locally-available assays. At each study visit, testing was performed using a rapid HIV test that was cleared by the United States (US) Food and Drug Administration (FDA) and a laboratory-implemented antigen/antibody (Ag/Ab) test. Some sites performed a second rapid HIV test, based on local testing guidelines. An HIV viral load test was performed within 14 days prior to study enrollment. The participant was not eligible for study enrollment if any of the HIV tests from the Screening visit, the HIV RNA test performed prior to the Enrollment visit, or the rapid HIV test from the Enrollment visit was reactive or positive. In these cases, HIV status was determined based on local testing guidelines.

After enrollment, if the rapid HIV test or the Ag/Ab test was reactive, an HIV RNA test was performed. Additional tests were performed at some sites based on local testing algorithms. HIV test results were reviewed in real-time by a centralized committee for all cases where a reactive or positive test was obtained. This committee provided guidance to study sites about administration/discontinuation of study drug and antiretroviral treatment (ART) initiation. In some cases, an ultra-sensitive HIV DNA assay was performed to help determine HIV status; this testing was performed in real-time at the HPTN Laboratory Center (Johns Hopkins Univ. School of Medicine, Baltimore, MD) with results returned to study sites.

### **Testing performed at the HPTN Laboratory Center**

Samples from all cases where a reactive or positive HIV test result was obtained at study sites were analyzed retrospectively at the HPTN Laboratory Center to determine HIV status. Results from this testing were not returned to study sites or participants. Assays used for this testing are described in Supplementary File 2. A pre-planned algorithm was used to confirm HIV infection (Figure 1). This testing was performed at the first visit where a reactive or positive test result was obtained at the study site. If a reactive qualitative RNA test result was obtained, “back testing” was performed with the same assay at prior study visits until a non-reactive result was obtained. The HPTN Laboratory Center classified participants as HIV Positive if they had a positive qualitative RNA test or a positive confirmatory Ab test. Whenever possible, HIV infection was confirmed using samples collected on two different dates.

Figure 1. Pre-planned HPTN Laboratory Center testing algorithm.

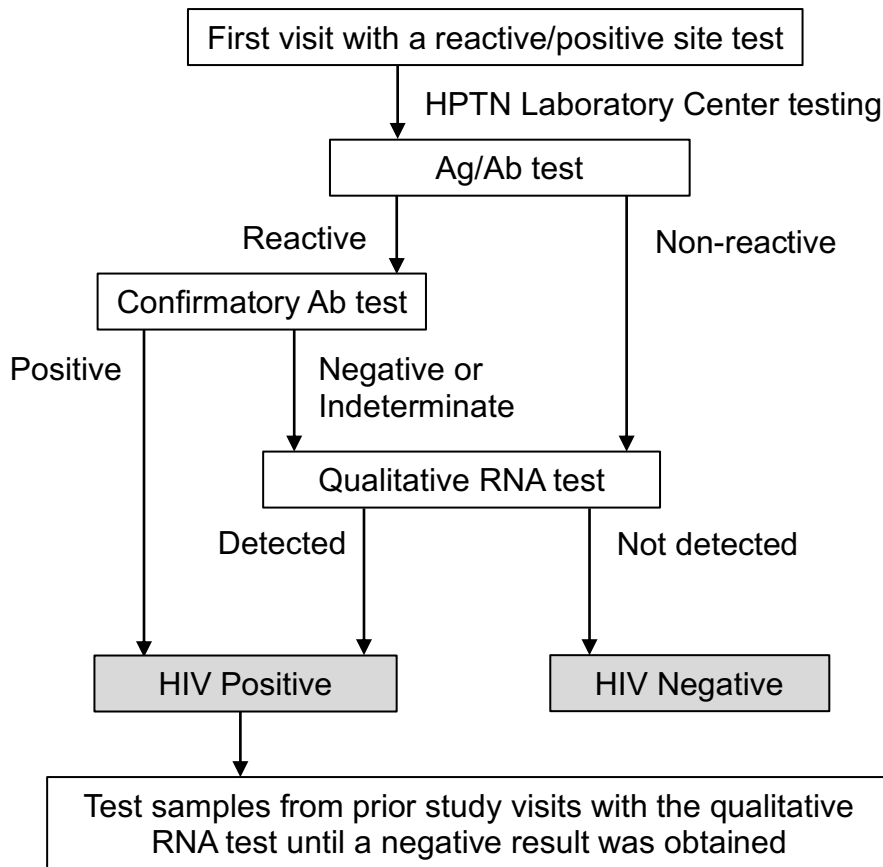

Legend for Figure 1.

The figure shows the algorithm used for pre-planned HIV testing at the HPTN Laboratory Center. This testing was performed prior to unblinding of study arm.

Tests included: Ag/Ab test: Architect HIV Ag/Ab Combo assay; confirmatory Ab test: Geenius HIV 1/2 Supplemental Assay; qualitative RNA test: Aptima HIV-1 RNA Qualitative Assay (see Supplementary File 2).

**Primary adjudication of study endpoints**

HIV test results from study sites and the HPTN Laboratory Center were reviewed by an independent Endpoint Adjudication Committee for all cases where at least one reactive or positive HIV test was obtained at the study site. The adjudication committee made a final determination of HIV status and identified the first HIV positive visit based on the available data. Confirmation of HIV infection by the adjudication committee required a positive RNA test, a positive confirmatory Ab test, or a positive HIV DNA test with a result above the lower limit of quantification.

**Post-hoc HIV testing**

For HIV infections that were confirmed by the Endpoint Adjudication Committee, the HPTN Laboratory Center performed additional testing to determine the timing of HIV infection and to

evaluate the impact of study drugs on viral replication and HIV antibody production. Different algorithms were used for this testing in the two study arms, based on test results obtained from pre-planned testing. The testing schema for each study arm is shown in Table 1.

Table 1. Post-hoc HIV testing algorithm\*.

| <b>Assay</b>         | <b>CAB arm</b>                                                                                                                                                                                                                                                                                                                                                                           | <b>TDF/FTC arm</b>                                                                                                                                                                                                                                                                                         |
|----------------------|------------------------------------------------------------------------------------------------------------------------------------------------------------------------------------------------------------------------------------------------------------------------------------------------------------------------------------------------------------------------------------------|------------------------------------------------------------------------------------------------------------------------------------------------------------------------------------------------------------------------------------------------------------------------------------------------------------|
| Qualitative RNA test | <ul style="list-style-type: none"> <li>• Enrollment</li> <li>• All subsequent visits until the second visit where the confirmatory Ab test is positive</li> </ul>                                                                                                                                                                                                                        | <ul style="list-style-type: none"> <li>• Enrollment</li> <li>• Weeks 2, 4, and 5</li> <li>• First site positive visit; continue testing prior visits until a non-reactive result is obtained</li> <li>• All subsequent visits until the second visit where the confirmatory Ab test is positive</li> </ul> |
| Ag/Ab test           | <ul style="list-style-type: none"> <li>• Enrollment</li> <li>• Three visits prior to the first visit where a reactive qualitative RNA result was obtained</li> <li>• First visit where a reactive qualitative RNA result was obtained</li> <li>• All subsequent visits until the second visit where the confirmatory Ab test is positive</li> </ul>                                      | Same as for the CAB arm, except only one visit prior to the first visit where a reactive qualitative RNA result is obtained                                                                                                                                                                                |
| Confirmatory Ab test | <ul style="list-style-type: none"> <li>• All visits where the Ag/Ab test was reactive</li> </ul>                                                                                                                                                                                                                                                                                         | Same as for the CAB arm                                                                                                                                                                                                                                                                                    |
| Single-copy RNA test | <ul style="list-style-type: none"> <li>• Enrollment, for all cases where the qualitative RNA test is reactive at or before the week 5 visit, but is non-reactive at enrollment</li> <li>• First HIV positive visit, if the qualitative RNA test is reactive, and there are no results from other tests performed at the HPTN Laboratory Center that were reactive or positive</li> </ul> | Same as for the CAB arm                                                                                                                                                                                                                                                                                    |

\*Testing was not required after initiation of antiretroviral therapy.

Tests used: qualitative RNA test: Aptima HIV-1 RNA Qualitative Assay; Ag/Ab test: Architect HIV Ag/Ab Combo assay; confirmatory Ab test: Geenius HIV 1/2 Supplemental Assay; single copy RNA test (laboratory-developed test) (see Supplementary File 1).

Abbreviations: CAB: cabotegravir; TDF/FTC: tenofovir disoproxil fumarate; Ab: antibody; Ag; antigen; HPTN: HIV Prevention Trials Network.

### Secondary adjudication of study endpoints

HIV test results from study sites and the HPTN Laboratory Center were re-reviewed by the Endpoint Adjudication Committee after post-hoc testing was complete. The adjudication committee revised the date of the first HIV positive visit if post-hoc testing determined that

infection occurred on a date that was earlier than the date identified in the primary adjudication review.

### **Classification of study visits**

The first site positive visit is defined as the first visit near the time of confirmed HIV infection where the site obtained a reactive or positive HIV test result. In some cases, a reactive HIV test was obtained earlier in the study with no other reactive/positive tests near the time of that visit; those results are not used to determine the first site HIV positive test.

The first HIV positive visit is defined as the first visit with evidence of HIV infection, as determined by the HPTN 083 Endpoint Adjudication Committee. This determination was based on review of results from testing performed at study sites and the HPTN Laboratory Center. In some cases, data from the HPTN Laboratory Center was not available for the primary review by the adjudication committee. Results from the single-copy RNA test were used to confirm infection at the first HIV positive visit if the qualitative RNA result was the only other reactive/positive HIV test; however, this test was not used alone to determine the date of the first HIV positive visit.

**Supplementary File 2: Assays used for retrospective testing.**

Table 1. Assays performed at the HPTN Laboratory Center.

| <b>Laboratory Name</b>                      | <b>Assays performed</b>                                           | <b>Test method</b>                                                                                                                                | <b>Test name used in this report</b> | <b>Manufacturer</b>                     |
|---------------------------------------------|-------------------------------------------------------------------|---------------------------------------------------------------------------------------------------------------------------------------------------|--------------------------------------|-----------------------------------------|
| HIV Clinical Research Laboratory            | Architect HIV Ag/Ab Combo assay                                   | Chemiluminescent microparticle assay (CMIA)                                                                                                       | Ag/Ab test                           | Abbott Diagnostics, Wiesbaden, Germany  |
|                                             | Geenius HIV 1/2 Supplemental Assay                                | Immunochemical assay for confirmation and differentiation of antibodies to HIV-1 and HIV-2                                                        | Confirmatory Ab test                 | Bio-Rad Laboratories, Inc., Redmond, WA |
| HPTN Core Laboratory                        | Aptima HIV-1 RNA Qualitative Assay <sup>a</sup>                   | HIV-1 RNA amplification by transcription-mediated amplification (TMA) and detection of amplification products by a hybridization protection assay | Qualitative RNA test                 | Hologic, Inc., San Diego, CA            |
|                                             | Abbott RealTime HIV-1 Viral Load Assay <sup>b</sup>               | Polymerase chain reaction (PCR) with homogenous real-time fluorescent detection (m2000 platform)                                                  | Viral load test                      | Abbott Molecular, Des Plaines, IL       |
| Persaud Laboratory                          | Ultrasensitive HIV DNA testing <sup>c</sup>                       | Quantitative HIV-1 DNA droplet digital PCR assay                                                                                                  | DNA assay                            | Laboratory developed test               |
| Clinical Pharmacology Analytical Laboratory | Quantitative TFV and CAB testing (plasma) <sup>d</sup>            | Liquid chromatography-tandem mass spectrometry (LC-MS/MS)                                                                                         | TFV, CAB test                        | Laboratory developed test               |
| Colorado Antiviral Pharmacology Laboratory  | Quantitative TFV-DP drug testing (dried blood spots) <sup>e</sup> | Liquid chromatography-tandem mass spectrometry (LC-MS/MS)                                                                                         | TFV-DP test                          | Laboratory developed test               |

Legend for Table 1.

- <sup>a</sup> The qualitative RNA test was performed for research purposes only; reactive results were not repeated on all samples. This assay has a limit of detection of 30 copies/mL.
- <sup>b</sup> The viral load test was initially performed using a validated dilution method (1:10 dilution, limit of quantification 400 copies/mL); if HIV RNA was not detected, or was detected below the limit of quantification, testing was repeated with the standard, undiluted assay (limit of quantification 40 copies/mL).
- <sup>c</sup> The DNA assay has a limit of quantification of 4.09 copies/million cells. The assay was performed using methods described previously.<sup>[1]</sup>
- <sup>d</sup> These assays have lower limits of quantification of 0.31 ng/mL for TFV and 25 ng/mL for CAB. These assays were performed using methods described previously.<sup>[2,3]</sup>
- <sup>e</sup> This assay has a lower limit of quantification of 31.3 fmol/punch for TFV-DP.<sup>[4,5]</sup>

Abbreviations: TFV: tenofovir; CAB: cabotegravir; TFV-DP: tenofovir diphosphate.

Table 2. Laboratory-developed tests performed at other laboratories.

| <b>Laboratory Name</b>     | <b>Laboratory Location</b>          | <b>Assay Performed</b>                   | <b>Test method</b>                              | <b>Test name used in this report</b> |
|----------------------------|-------------------------------------|------------------------------------------|-------------------------------------------------|--------------------------------------|
| Monogram Biosciences, Inc. | South San Francisco, CA             | GenoSure PRIme                           | HIV genotyping (for NRTIs, NNRTIs, PIs, INSTIs) | Genotyping assay                     |
|                            |                                     | PhenoSense INSTI with cabotegravir       | HIV phenotyping (INSTIs, cabotegravir)          | Phenotyping assay                    |
| Mellors Laboratory         | Univ. of Pittsburgh, Pittsburgh, PA | Single copy HIV RNA testing <sup>a</sup> | Plasma HIV-1 RNA single-copy assay              | Single-copy RNA assay                |

<sup>a</sup> Results were reported as average HIV RNA copies/mL or as NEG/not detected (ND) if the total number of copies detected was zero.<sup>[7]</sup>

Abbreviations: NRTI: nucleoside/nucleotide reverse transcriptase inhibitor; NNRTI: non-nucleoside reverse transcriptase inhibitor PI: INSTI: integrase strand transfer inhibitor.

## **References:**

1. Powell L, Dhummakupt A, Siems L, Singh D, Le Duff Y, Uprety P, et al. Clinical Validation of a Quantitative HIV-1 DNA Droplet Digital PCR assay: Applications for detecting occult HIV-1 infection and monitoring cell-associated HIV-1 dynamics across different subtypes in HIV-1 prevention and cure trials. In: medRxiv; 2020. <https://doi.org/10.1101/2020.09.29.20200154>.
2. Landovitz RJ, Li S, Eron JJ, Jr., Grinsztejn B, Dawood H, Liu AY, et al. Tail-phase safety, tolerability, and pharmacokinetics of long-acting injectable cabotegravir in HIV-uninfected adults: a secondary analysis of the HPTN 077 trial. *Lancet HIV* 2020; 7(7):e472-e481.
3. Hendrix CW, Andrade A, Bumpus NN, Kashuba AD, Marzinke MA, Moore A, et al. Dose frequency ranging pharmacokinetic study of tenofovir-emtricitabine after directly observed dosing in healthy volunteers to establish adherence benchmarks (HPTN 066). *AIDS Res Hum Retroviruses* 2016; 32(1):32-43.
4. Anderson PL, Liu AY, Castillo-Mancilla JR, Gardner EM, Seifert SM, McHugh C, et al. Intracellular tenofovir-diphosphate and emtricitabine-triphosphate in dried blood spots following directly observed therapy. *Antimicrob Agents Chemother* 2018; 62(1).
5. Gilead. Truvada prescribing information. [https://www.gilead.com/~media/files/pdfs/medicines/hiv/truvada/truvada\\_pi.pdf](https://www.gilead.com/~media/files/pdfs/medicines/hiv/truvada/truvada_pi.pdf). Access date 12/1/20.
6. Castillo-Mancilla, JR, Zheng JH, Rower HE, Meditz A, Gardner EM, Predhomme J, et al. Tenofovir, emtricitabine, and tenofovir diphosphate in dried blood spots for determining recent and cumulative drug exposure. *AIDS Res Hum Retroviruses* 2013; 29(2): 384-390.
7. Tosiano MA, Jacobs JL, Shutt KA, Cyktor JC, Mellors JW. A simpler and more sensitive single-copy HIV-1 RNA assay for quantification of persistent HIV-1 viremia in individuals on suppressive antiretroviral therapy. *J Clin Microbiol* 2019; 57: e01714-18.



### **Supplementary File 3. Antiretroviral drug testing.**

Samples from participants with confirmed HIV infection were analyzed using liquid chromatography-tandem mass spectrometry (LC-MS/MS) to determine the concentration of study drugs. Cabotegravir (CAB) was quantified in plasma using an assay with a lower limit of quantification (LOQ) of 0.025 mcg/mL (CAB test).<sup>[1]</sup> Tenofovir (TFV) was quantified in plasma using an assay with an LOQ of 0.31 ng/mL (TFV test).<sup>[2]</sup> Tenofovir diphosphate (TFV-DP) was quantified in dried blood spots using an assay with a LOQ of 31.3 fmol/punch (TFV-DP test).<sup>[3,4]</sup> Different algorithms were used for this testing in the two study arms (see Table 1).

Table 1. Algorithm for antiretroviral drug testing.

| <b>Assay</b>                    | <b>CAB arm</b>                                                                                                                                                                                                                                                                                                           | <b>TDF/FTC arm</b>                                                                                                                                                                                                                                                                                                                                                                                                                            |
|---------------------------------|--------------------------------------------------------------------------------------------------------------------------------------------------------------------------------------------------------------------------------------------------------------------------------------------------------------------------|-----------------------------------------------------------------------------------------------------------------------------------------------------------------------------------------------------------------------------------------------------------------------------------------------------------------------------------------------------------------------------------------------------------------------------------------------|
| CAB test (plasma)               | <ul style="list-style-type: none"> <li>• Enrollment</li> <li>• All subsequent visits through 5/14/20.</li> </ul>                                                                                                                                                                                                         | Not performed                                                                                                                                                                                                                                                                                                                                                                                                                                 |
| TFV test (plasma)               | <p>This testing was performed for the following participants using the testing plan for the TDF/FTC arm:</p> <ul style="list-style-type: none"> <li>• Participants infected during the Step 3 when open label TDF/FTC was offered to participants</li> <li>• Participants who had HIV infection at enrollment</li> </ul> | <ul style="list-style-type: none"> <li>• First site positive visit</li> <li>• First HIV positive visit</li> <li>• Three visits prior to the first site positive visit or first HIV positive visit, whichever came first (1-5 samples per participant*)</li> <li>• All visits from enrollment to the first site positive visit for participants with evidence of consistent good adherence to daily oral TDF/FTC (E16 and E34 only)</li> </ul> |
| TFV-DP test (dried blood spots) | <p>This testing was performed for the following participants using the testing plan for the TDF/FTC arm:</p> <ul style="list-style-type: none"> <li>• Participants who acquired HIV infection during Step 3 when open label TDF/FTC was offered to participants, when available</li> </ul>                               | <ul style="list-style-type: none"> <li>• First site positive visit</li> <li>• First HIV positive visit</li> <li>• One visit prior to the first site positive visit or first HIV positive visit, whichever came first (1-3 samples per participant*)</li> </ul>                                                                                                                                                                                |

\*In some cases, the first site positive visit and first HIV positive visit were on the same date; in some cases, fewer visits may have occurred prior to the first site HIV positive visit.

CAB concentration thresholds used in this manuscript were based on the *in vitro* protein-adjusted CAB concentration required for 90% viral inhibition (PA-IC<sub>90</sub>).<sup>[5]</sup> Rectal and vaginal challenge studies conducted in macaques showed that concentrations >3x PA-IC<sub>90</sub> (rectal) and >4x PA-IC<sub>90</sub> (vaginal) conferred 100% and 87% protection, respectively.<sup>[6,7]</sup> Geometric mean concentrations of 1.35 mcg/mL (approximately the 8x PA-IC<sub>90</sub>) were achieved in a previous treatment study evaluating 10 mg oral CAB dosing (LATTE-2).<sup>[8]</sup> These benchmarks were used to aid in the interpretation of drug concentrations in this study; the dosing schedule used in HPTN 083 (600 mg CAB-LA 4 weeks apart for the first two injections, and then every 8 weeks thereafter) was designed to achieve steady state concentrations of >8x PA-IC<sub>90</sub>, which were predicted to confer protection based on earlier macaque challenge studies.

## **References**

1. Landovitz RJ, Li S, Eron JJ, Jr., et al. Tail-phase safety, tolerability, and pharmacokinetics of long-acting injectable cabotegravir in HIV-uninfected adults: a secondary analysis of the HPTN 077 trial. *Lancet HIV* 2020; 7(7):e472-e481.
2. Hendrix CW, Andrade A, Bumpus NN, et al. Dose frequency ranging pharmacokinetic study of tenofovir-emtricitabine after directly observed dosing in healthy volunteers to establish adherence benchmarks (HPTN 066). *AIDS Res Hum Retroviruses* 2016; 32(1):32-43.
3. Anderson PL, Liu AY, Castillo-Mancilla JR, et al. Intracellular tenofovir-diphosphate and emtricitabine-triphosphate in dried blood spots following directly observed therapy. *Antimicrob Agents Chemother* 2018; 62(1).
4. Castillo-Mancilla, JR, Zheng JH, Rower HE, et al. Tenofovir, emtricitabine, and tenofovir diphosphate in dried blood spots for determining recent and cumulative drug exposure. *AIDS Res Hum Retroviruses* 2013; 29(2): 384-390.
5. Spreen W, Min S, Ford SL, et al. Pharmacokinetics, safety, and monotherapy antiviral activity of GSK1265744, an HIV integrase strand transfer inhibitor. *HIV Clin Trials* 2013; 14:192-203.
6. Andrews CD, Spreen WR, Mohri H, et al. Long-acting integrase inhibitor protects macaques from intrarectal simian/human immunodeficiency virus. *Science*. 2014; 343(6175):1151–1154.
7. Andrews CD, Yueh YL, Spreen WR, et al. A long-acting integrase inhibitor protects female macaques from repeated high-dose intravaginal SHIV challenge. *Sci Transl Med*. 2015; 7(270):270ra4.
8. Margolis DA, Gonzalez-Garcia J, Stellbrink HJ, Eron JJ, Yazdanpanah Y, Podzamczer D, Lutz T, Angel JB, Richmond GJ, Clotet B, Gutierrez F, Sloan L, Clair MS, Murray M, Ford SL, Mrus J, Patel P, Crauwels H, Griffith SK, Sutton KC, Dorey D, Smith KY, Williams PE, Spreen WR. Long-acting intramuscular cabotegravir and rilpivirine in adults with HIV-1 infection (LATTE-2): 96-week results of a randomised, open-label, phase 2b, non-inferiority trial. *Lancet*. 2017; 390(10101):1499-1510.

## **Supplementary File 4. HIV drug resistance**

### HIV genotyping

This testing was performed at Monogram Biosciences, Inc. using the GenoSure PRIme assay. This assay provides comprehensive resistance data for four classes of HIV drugs, including protease inhibitors (PIs), nucleoside/nucleotide reverse transcriptase inhibitors (NRTIs), non-nucleoside reverse transcriptase inhibitors (NNRTIs), and integrase strand transfer inhibitors (INSTIs). Drug susceptibility is determined using Monogram's proprietary HIV-1 genotype algorithm, which is based on a database of more than 100,000 matched HIV-1 genotype-phenotype results. The 2019 IAS Drug Resistance Mutations Update<sup>[1]</sup> was used to identify major drug resistance mutations and drug resistance mutations for cabotegravir (CAB), since information on CAB resistance is not provided in the GenoSure PRIme test report. This testing was performed using a sample from the first study visit that had a viral load >500 copies/mL (first viremic visit); 0.5 mL of plasma was used for testing. For the CAB arm, this testing was also performed using samples from all subsequent study visits prior to initiation of antiretroviral therapy where the viral load was >500 copies/mL.

HIV phenotyping was performed at Monogram Biosciences, Inc. using the PhenoSense INSTI assay. This assay provides a quantitative assessment of phenotypic drug susceptibility to all licensed INSTIs. Cabotegravir provided by the manufacturer and was included in the assay. This testing was performed in the cabotegravir study arm; 1 mL of plasma was used for testing.

### Reference:

1. Wensing AM, Calvez V, Ceccherini-Silberstein F, Charpentier C, Gunthard HF, Paredes R, et al. 2019 update of the drug resistance mutations in HIV-1. *Top Antivir Med* 2019; 27(3):111-121.

### **Cases with INSTI resistance**

Resistance to INSTIs was detected in five cases, all in the CAB arm.

Case A2 (HIV subtype C): This participant had acute HIV infection at enrollment with a viral load of 50,080 copies/mL. HIV infection was first detected by site testing 60 days after the first HIV positive visit (infection was not detected at four study visits). The participant received oral CAB and one CAB injection after HIV acquisition. There was no evidence of resistance at enrollment, week 2, or week 4. The viral load was suppressed to 204 copies/mL by week 5 on oral CAB. The viral load rebounded to 1,660 copies/mL at the week 6 visit (60 days after enrollment). The CAB concentration at that visit was 3.84 mcg/mL. The participant had INSTI resistance with E138K and Q148K at that visit. This participant was later virally suppressed on an antiretroviral treatment (ART) regimen of tenofovir disoproxil fumarate (TDF), lamivudine (3TC) and ritonavir-boosted darunavir (DRVr).

Case C1 (HIV subtype B): This participant was infected in the oral lead-in period. HIV infection was first detected by site testing 47 days after the first HIV positive visit (infection was not detected at four study visits). The participant received two CAB injections after HIV acquisition. The maximum viral load prior to the first viremic visit was 161 copies/mL. The participant had INSTI resistance with L74I and Q148R at the first viremic visit (week 9; 37 days after first HIV positive visit; 28 days after the first CAB injection; viral load 2,174 copies/mL). The participant had INSTI resistance with L74I, E138E/K, G140G/S and Q148R at the following visit (week 10; first site positive visit; 10 days later; 47 days after the first HIV positive visit; 10 days after the second CAB injection; viral load 1,373 copies/mL). The CAB concentration at that visit was 3.47 mcg/mL. The

participant did not start ART before May 14, 2020. The same INSTI drug resistance mutations were detected 4 days later (viral load 2,549 copies/mL). Information on subsequent ART was not available for this participant.

Case C3 (HIV subtype B): This participant was infected during the oral lead-in period. HIV infection was first detected by site testing 35 days after the first HIV positive visit (infection was not detected at four study visits). The participant received one CAB injection after HIV acquisition. The maximum viral load prior to the first viremic visit was 99 copies/mL. The participant had INSTI resistance with E138A and Q148R at the first viremic visit, which was also the first site positive visit (week 9; 20 days after first CAB injection; viral load 102,329 copies/mL). The CAB concentration at this visit was 1.11 mcg/mL. Phenotypic resistance testing documented resistance to CAB (fold change [FC]: 5.92), elvitegravir (FC: > maximum), and raltegravir (FC: 17), with susceptibility to bictegravir (FC: 1.20) and dolutegravir (FC: 1.69). The participant started ART 9 days later with TDF/emtricitabine (FTC)/efavirenz (EFV); the viral load was <40 copies/mL 160 days after ART initiation.

Case D3 (HIV subtype B/F): This participant was infected despite on-time CAB-LA injections. HIV infection was first detected by site testing 117 days after the first HIV positive visit (infection was not detected at five study visits). The participant received two CAB injections after HIV acquisition. This participant had NNRTI resistance with K103N only at the first viremic visit, which was also the first HIV positive visit and the date of the third CAB injection (week 17; viral load 860 copies/mL). This participant also had INSTI resistance with R263K at a subsequent visit (week 33; 112 days later; 5 days before first site positive visit; 50 days after fourth CAB injection; viral load 7,160 copies/mL). The maximum viral load between the week 17 visit and this visit was 112 copies/mL. The CAB concentration at the week 33 visit was 1.33 mcg/mL. Phenotypic resistance testing documented resistance to elvitegravir (FC: 4.14) and partial susceptibility to bictegravir (FC: 2.89), with susceptibility to dolutegravir (FC: 2.29), CAB (FC: 2.32), and raltegravir (FC: 1.38). The participant started ART 5 days later with TDF/3TC/DRVr and was virally suppressed one month after ART initiation.

Case D4 (HIV subtype C): This participant was infected despite on-time CAB-LA injections. HIV infection was first detected by site testing 45 days after the first HIV positive visit (infection was not detected at one study visit). The participant received one CAB injection after HIV acquisition. The maximum viral load prior to the first viremic visit was 263 copies/mL. The participant had INSTI resistance with G140A and Q148R at the first viremic visit ("step 3" week 12; 141 days after first HIV positive visit; 96 days after the fourth CAB-LA injection; viral load 152,730 copies/mL). The CAB concentration at that visit was 2.26 mcg/mL. Phenotypic resistance testing documented resistance to CAB (fold change [FC]: 13), elvitegravir (FC: 107), and raltegravir (FC: 43), with susceptibility to dolutegravir (FC: 2.09) and partial susceptibility to bictegravir (FC: 2.77). The participant started ART at that visit with a regimen of TDF/FTC/EFV. The viral load was <40 copies/mL 84 days after ART initiation.

### **Cases with TDF/FTC resistance**

Resistance to TDF/FTC (with K65R and/or M184I/V) was detected at the first viremic visit in five cases (one in the CAB arm; four in the TDF/FTC arm). Two other participants had no resistance at the first viremic visit, but had resistance to study drugs at a subsequent visit.

Case A1 (HIV subtype B): This participant was in the CAB arm and had acute HIV infection at enrollment with a viral load of 4,010 copies/mL. HIV infection was first detected by site testing 28 days after the first HIV positive visit (infection was not detected at two study visits). The

participant received oral CAB after HIV acquisition. K65R and M184V were detected, along with major NNRTI mutations (L100I, K103N, P225H). TFV was not detected at the enrollment visit or at the week 2, week 4, or week 5 visits. This indicates that the participant was not likely using TDF/FTC for pre-exposure prophylaxis near the time of infection, and that the presence of the K65R and M184V mutations (along with the NNRTI mutations) most likely reflects infection with a multi-class resistant HIV strain. Information on subsequent ART was not available for this participant.

Case E3 (HIV subtype B):

This participant was in the TDF/FTC arm and had a positive confirmatory Ab test at the first HIV positive visit with a viral load of 211,570 copies/mL. The site detected the infection at that visit. M184I was detected at that visit. ARV drug testing indicated that the participant had inconsistent adherence to daily TDF/FTC in the months preceding infection. In this case, the participant may have acquired the M184I mutation as a result of study drug exposure. No other major drug resistance mutations were detected.

Case E13 (HIV subtype B): This participant was in the TDF/FTC arm and had early HIV infection at the first viremic visit (with an indeterminate confirmatory Ab test; week 65; 470 days after enrollment). The site detected the infection at that visit. M184V was detected, along with K103N. ARV drug testing detected a low concentration of TFV-DP in dried blood spots (41 fmol/punch); TFV was not detected in plasma. This indicates that the participant was likely not taking TDF/FTC in the prior two months, and that detection of the M184V mutation (along with K103N) most likely reflects infection with a multi-class resistant HIV strain.

Case E16 (HIV subtype B): This participant was in the TDF/FTC arm and had a positive confirmatory Ab test at the first HIV positive visit with a viral load of 2,720 copies/mL (week 57: 403 days after enrollment). The site detected the infection at that visit. The K65R mutation was detected at that visit, along with Y181C, G190A, H221Y and other NNRTI mutations. ARV drug testing indicated that the participant was adherent to daily TDF/FTC in the months preceding infection. In this case, the participant was most likely infected with a multi-class resistance strain. Presence of K65R mutation in the infecting strain may have played a role in failure of TDF/FTC PrEP.

Case E25 (HIV subtype B/F): This participant was in the TDF/FTC arm and had acute HIV infection at the first viremic visit with a viral load of 36,976,550 copies/mL (week 43; 306 days after enrollment). The site detected the infection at that visit. M184V was detected, along with major NNRTI resistance mutations (K103N, P225H). ARV drug testing detected very low concentrations of TFV-DP in dried blood spots; TFV was not detected in plasma. This indicates that the participant was likely not taking TDF/FTC in the prior two months, and that detection of the M184V mutation (along with the NNRTI resistance mutations) most likely reflects infection with a multi-class resistant HIV strain.

Case E41 (HIV subtype B): This participant was in the TDF/FTC arm and had acute infection at enrollment with a viral load of 1,930 copies/mL. HIV infection was first detected by site testing 34 days after enrollment (infection was not detected at two study visits). No resistance was detected at enrollment and M184I was detected at week 4. ARV drug testing indicated that the participant was adherent to daily TDF/FTC. In this case, the participant may have acquired the M184I mutation as a result of study drug exposure.

Case E42 (HIV subtype B): This participant was in the TDF/FTC arm and had acute infection at enrollment with a viral load of 10,000 copies/mL. HIV infection was first detected by site testing

14 days after enrollment (infection was not detected at one study visit). No resistance was detected at enrollment and M184I/V was detected at week 2. ARV drug testing indicated that the participant was adherent to daily TDF/FTC. In this case, the participant may have acquired the M184I/V mutation as a result of study drug exposure.

## **Supplementary File 5. Case Summaries, CAB arm (groups A-D)**

This file shows a summary of laboratory results and key events for participants in the cabotegravir (CAB) study arm (participant groups A-D). Each panel shows the results for one participant.

**Tables:** The table at the top of each panel shows results from testing performed at study sites (Site Testing) and testing performed at the HPTN Laboratory Center (LC) or at laboratories that performed specialized testing for the HPTN LC (HPTN LC Testing). Additional information about these tests is provided in Supplemental File 1. A bracket on the left shows the number of days between the first HIV positive visit (1<sup>st</sup> HIV pos) and the first site positive visit (1<sup>st</sup> SITE pos). An asterisk in the column for visit type indicates that the participant received an injection at that visit. Blue text indicates a reactive or positive site test result. Red text indicates a reactive or positive HPTN LC test result. Viral load values indicate the number of HIV RNA copies/mL; SCA indicates that the viral load result was obtained using a single copy RNA assay. Viral load results noted as <40 indicate that HIV RNA was detected below the limit of quantification. Resistance indicates data from HIV genotyping; all drug resistance mutations are shown for INSTIs (*italics*); major drug resistance mutations are shown for NNRTIs, NRTIs, PIs. Data from HIV phenotyping is presented in Table 3. Shaded rows indicate data obtained from samples collected after ART initiation. Information on ART is shown below each table.

**Figures:** Annotations above each graph show results obtained from testing performed at the HPTN LC as a function of time. A plus sign (+) indicates a reactive or positive test result. A minus sign (-) indicates a non-reactive or negative test result. IND indicates an indeterminate test result. Viral load values indicate the number of HIV RNA copies/mL. Drug resistance mutations are noted (see above); major drug resistance mutations are shown in bold text. Brackets show the number of days between the last injection and the first HIV positive visit. Graphs show plasma cabotegravir concentrations and key events as a function of time (weeks since enrollment). A red vertical line indicates the first HIV positive visit; a blue vertical line indicates the first site positive visit; a red/blue dashed line indicates that the first HIV positive visit and first site positive visit occurred on the same date. Open orange circles indicate CAB concentrations. Horizontal lines show the following concentration cut-offs: 1.33 mcg/mL = 8x PA-IC<sub>90</sub>; 0.664 mcg/mL = 4x PA-IC<sub>90</sub>; 0.166 mcg/mL = 1x PA-IC<sub>90</sub>; BLQ: below the limit of quantification (<0.025 mcg/mL). Shaded areas indicate that the participant was on ART.

**Abbreviations:** Ag/Ab: antigen/antibody test; SCA: single copy RNA assay; 1<sup>st</sup> HIV pos: first HIV positive visit; 1<sup>st</sup> SITE pos: first site positive visit; NR: non-reactive; R: reactive; POS: positive; NEG: negative; Detect: HIV DNA detected; INDET or ID: indeterminate; ND: not detected; CAB: cabotegravir; mcg: microgram; mL: milliliter; WT: wild type (no resistance mutations detected); BLQ: below the limit of quantification; LLOD: lower limit of detection; F/U: follow-up; ART: antiretroviral therapy; PEP: post-exposure prophylaxis.

Antiretroviral drugs: TDF: tenofovir disoproxil fumarate; FTC: emtricitabine; DRV: darunavir; r: ritonavir; c: cobicistat; TAF: tenofovir alafenamide; EFV: efavirenz; RPV: rilpivavirine; BIC: bictegravir; 3TC: lamivudine.

# Case A1

|                      | Visit type | Diagnosis visit type | Site Testing |            |             |            | HPTN LC Testing      |            |                      |                      |            |                                      |
|----------------------|------------|----------------------|--------------|------------|-------------|------------|----------------------|------------|----------------------|----------------------|------------|--------------------------------------|
|                      |            |                      | Rapid 1 test | Ag/Ab test | DNA test    | Viral load | Confirmatory Ab test | Ag/Ab test | Qualitative RNA test | Confirmatory Ab test | Viral load | Resistance                           |
| 28 days              | Enrollment | 1st HIV pos          | NR           | NR         |             |            |                      | NR         | R                    |                      | 4,010      | K65R+M184V;<br>L100I+K103N+<br>P225H |
|                      | Week 2     |                      | NR           | NR         |             |            |                      | NR         | R                    |                      | <40        |                                      |
|                      | Week 4     | 1st SITE pos         | NR           | R          |             | 50         | NEG                  | NR         | R                    |                      | 78         |                                      |
|                      | Interim    |                      | NR           | R          | Detect, 4.2 | 54         | NEG                  | NR         | R                    |                      | <40        |                                      |
| ART status not known |            |                      |              |            |             |            |                      |            |                      |                      |            | HIV subtype B                        |

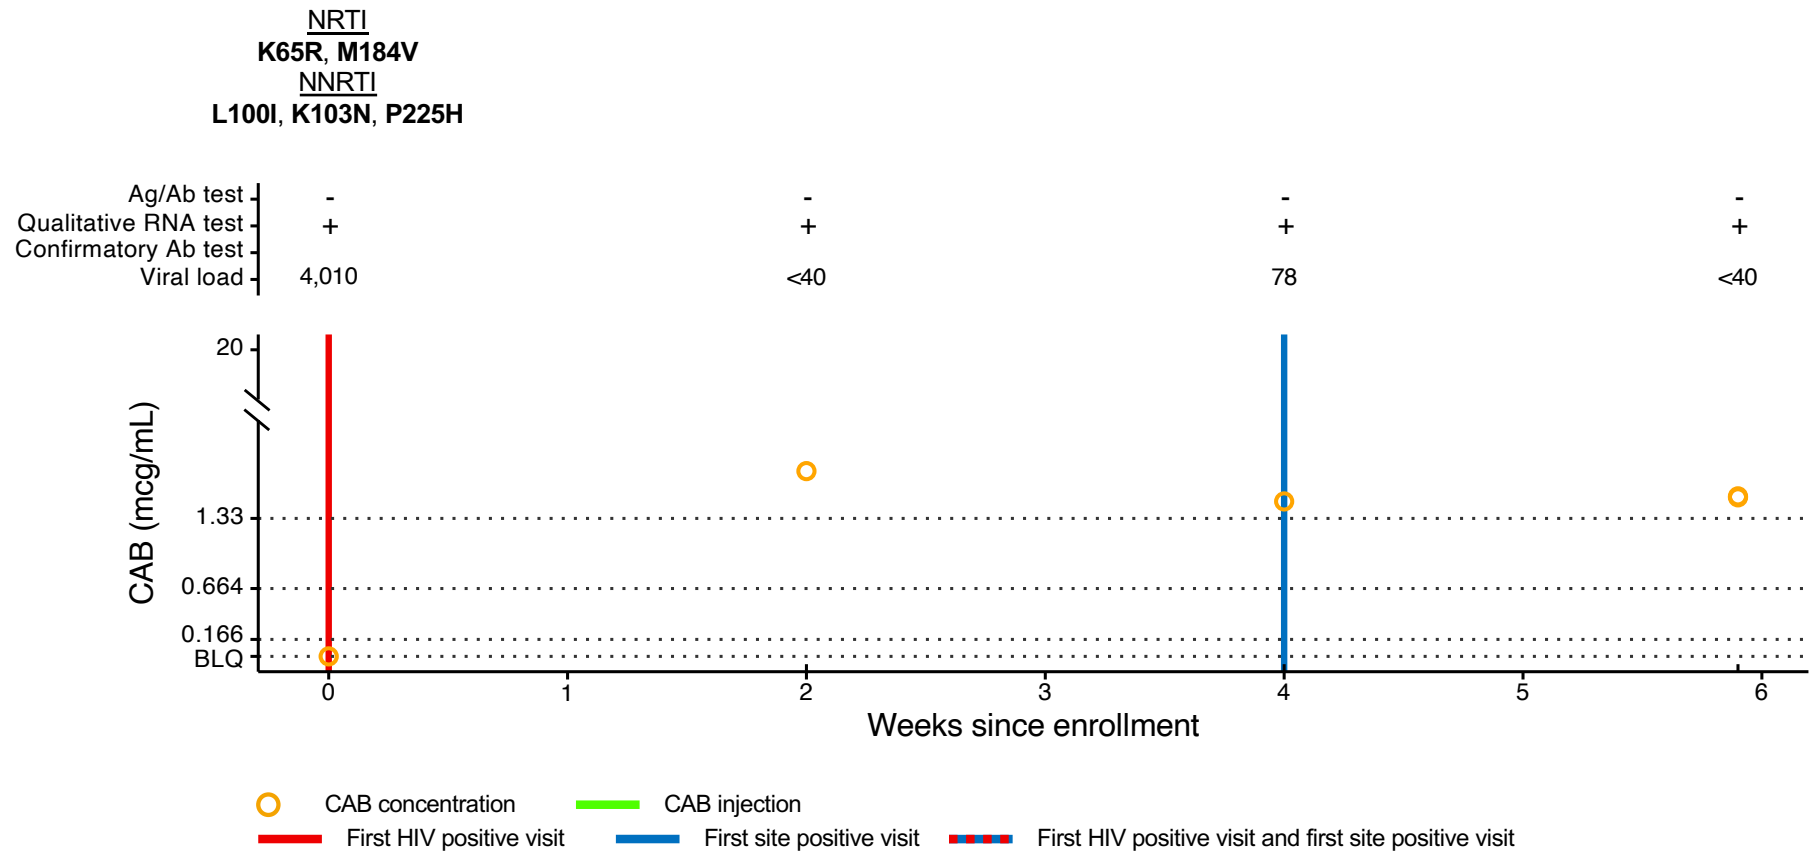



# Case A2

|         | Visit type | Diagnosis visit type | Site Testing |            |              |            | HPTN LC Testing      |            |                      |                      |            |             |
|---------|------------|----------------------|--------------|------------|--------------|------------|----------------------|------------|----------------------|----------------------|------------|-------------|
|         |            |                      | Rapid 1 test | Ag/Ab test | DNA test     | Viral load | Confirmatory Ab test | Ag/Ab test | Qualitative RNA test | Confirmatory Ab test | Viral load | Resistance  |
| 60 days | Enrollment | 1st HIV pos          | NR           | NR         |              |            |                      | NR         | R                    |                      | 50,080     | WT          |
|         | Week 2     |                      | NR           | NR         |              |            |                      | NR         | R                    |                      | 20,760     | WT          |
|         | Week 4     |                      | NR           | NR         |              |            |                      | NR         | R                    |                      | 700        | WT          |
|         | Week 5*    |                      | NR           | NR         |              |            |                      | NR         | R                    |                      | 204        |             |
|         | Week 6     | 1st SITE pos         | NR           | R          |              |            |                      | R          | R                    | POS                  | 1,660      | E138K+Q148K |
|         | Week 6**   |                      | NR           | R          | Detect, >100 | 10,000     | POS                  | R          | R                    | POS                  | 4,829      | E138K+Q148K |

\*\*ART started 44 days later; virally suppressed on TDF/3TC/DRVr  
HIV subtype C

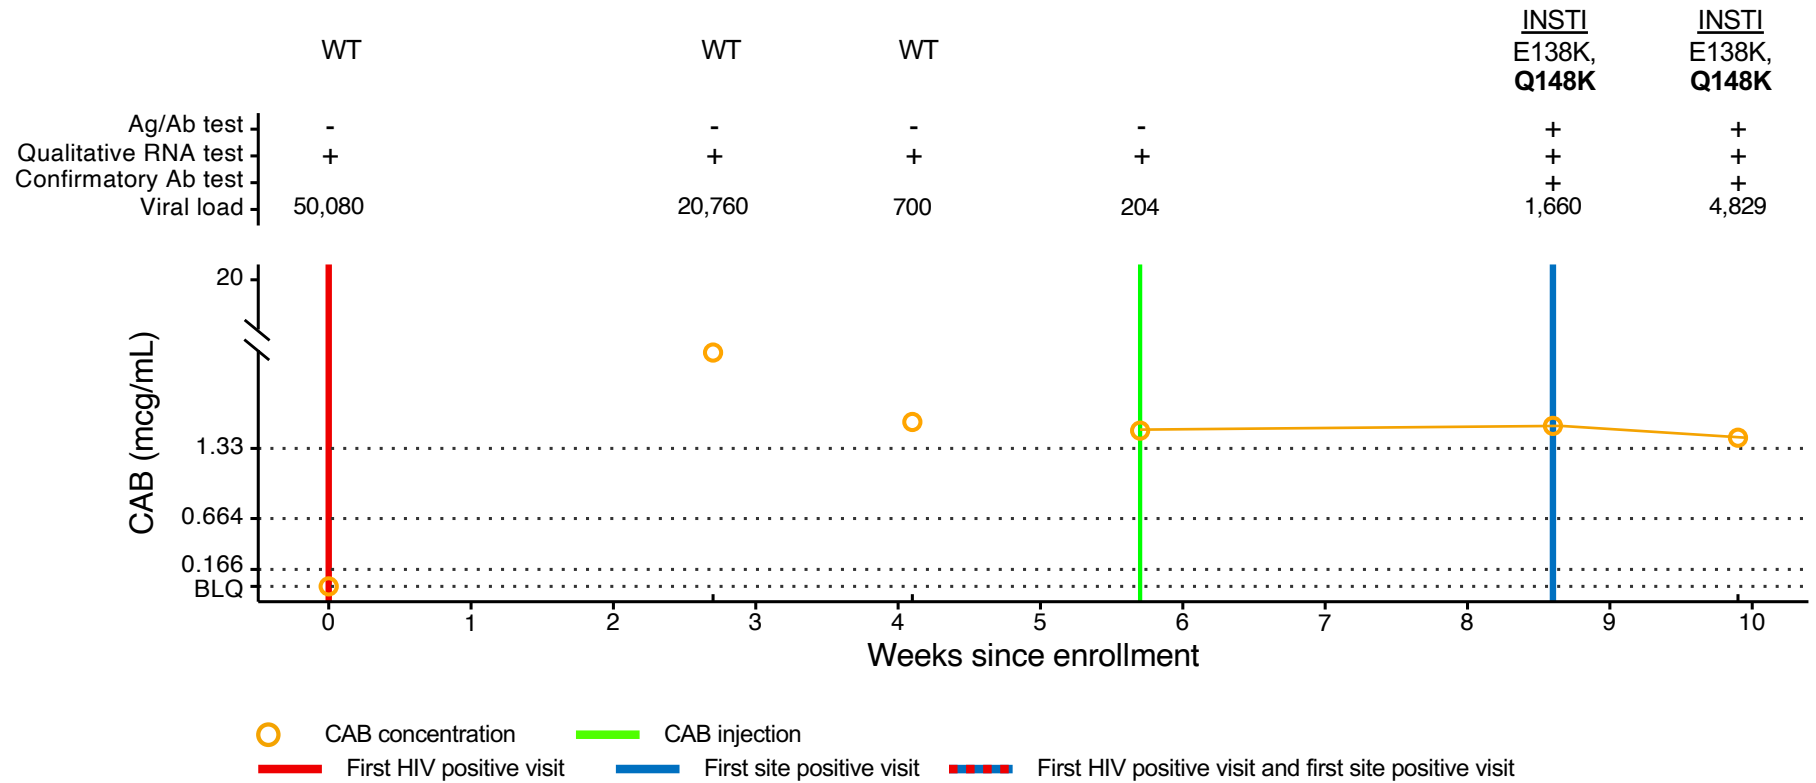

# Case A3

|         | Visit type    | Diagnosis visit type | Site Testing |            |               |            | HPTN LC Testing      |            |                      |                      |            |            |
|---------|---------------|----------------------|--------------|------------|---------------|------------|----------------------|------------|----------------------|----------------------|------------|------------|
|         |               |                      | Rapid 1 test | Ag/Ab test | DNA test      | Viral load | Confirmatory Ab test | Ag/Ab test | Qualitative RNA test | Confirmatory Ab test | Viral load | Resistance |
| 72 days | Enrollment    | 1st HIV pos          | NR           | NR         |               |            |                      | NR         | R                    |                      | 1,360      | WT         |
|         | Week 2        |                      | NR           | NR         |               |            |                      | R          | R                    | NEG                  | <40        |            |
|         | Week 4        |                      | NR           | NR         |               |            |                      | NR         | NR                   |                      |            |            |
|         | Week 5*       |                      | NR           | NR         |               |            |                      | NR         | NR                   |                      |            |            |
|         | Week 6        |                      | NR           | NR         |               |            |                      | NR         | R                    |                      | ND         |            |
|         | Week 9*       |                      | NR           | NR         |               |            |                      | NR         | NR                   |                      |            |            |
|         | Week 10       | 1st SITE pos         | NR           | R          |               | ND         | NEG                  | NR         | NR                   |                      |            |            |
|         | Week 10       |                      | NR           | R          | Detect, <LLOD | ND         | NEG                  | NR         | NR                   |                      |            |            |
|         | Week 10       |                      | NR           | NR         | Detect, 5.3   | ND         |                      | NR         | NR                   |                      |            |            |
|         | F/U Week 12   |                      |              |            |               |            |                      | R          | R                    | INDET                | 1,440      | WT         |
|         | F/U Week 24** |                      |              |            |               |            | 87,171               | R          | R                    | POS                  | 76,090     | WT         |

\*\*Started ART 6 months later with TDF/FTC/EFV; viral load 142 after 1 month on ART

HIV subtype B

|                      | WT    |     |   |   |    | WT |   |   |   |   | WT |   |   |   |   |   |   |   |
|----------------------|-------|-----|---|---|----|----|---|---|---|---|----|---|---|---|---|---|---|---|
| Ag/Ab test           | -     | +   | - | - | -  | -  | - | - | - | - | -  | - | - | - | - | - | - | - |
| Qualitative RNA test | +     | +   | - | - | +  | -  | - | - | - | - | -  | - | - | - | - | - | - | - |
| Confirmatory Ab test | -     | -   | - | - | -  | -  | - | - | - | - | -  | - | - | - | - | - | - | - |
| Viral load           | 1,360 | <40 |   |   | ND |    |   |   |   |   |    |   |   |   |   |   |   |   |

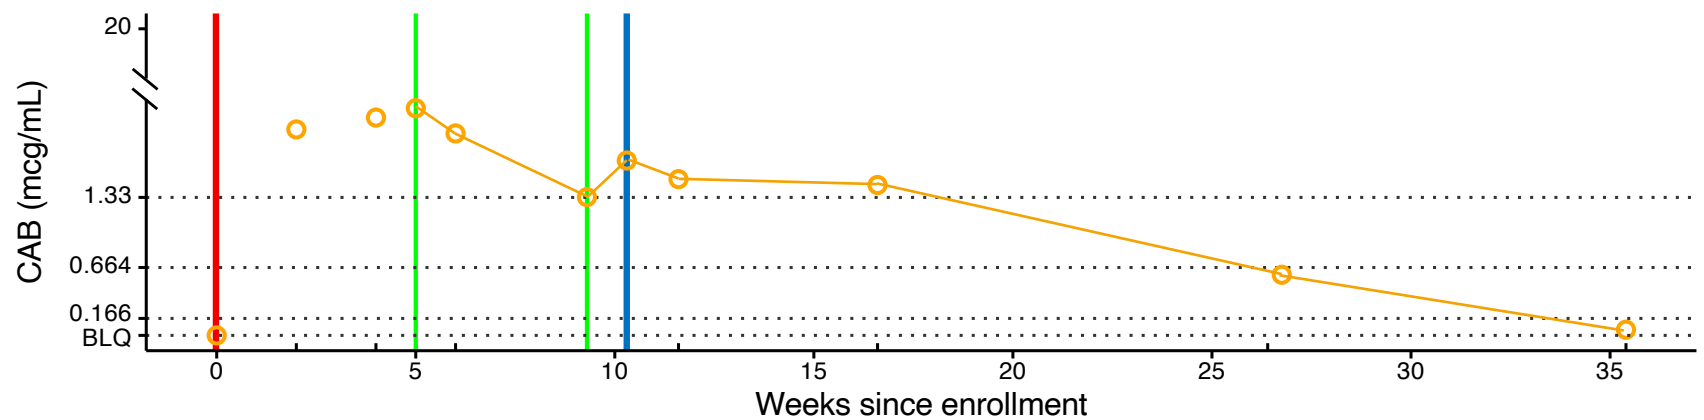

- CAB concentration
- CAB injection
- First HIV positive visit
- First site positive visit
- — First HIV positive visit and first site positive visit

# Case A4

|         | Visit type  | Diagnosis visit type | Site Testing |            |            |              | HPTN LC Testing |                      |                      |            |            |
|---------|-------------|----------------------|--------------|------------|------------|--------------|-----------------|----------------------|----------------------|------------|------------|
|         |             |                      | Rapid 1 test | Ag/Ab test | Viral load | DNA test     | Ag/Ab test      | Qualitative RNA test | Confirmatory Ab test | Viral load | Resistance |
| 63 days | Enrollment  | 1st HIV pos          | NR           | NR         |            |              | R               | R                    | NEG                  | 44,180     | WT         |
|         | Week 2      |                      | NR           | NR         |            |              | NR              | R                    |                      | <40        |            |
|         | Week 4      |                      | NR           | NR         |            |              | NR              | NR                   |                      |            |            |
|         | Week 5*     |                      | NR           | NR         |            |              | NR              | NR                   |                      |            |            |
|         | Week 6      |                      | NR           | NR         |            |              | NR              | R                    |                      | <40        |            |
|         | Week 9*     | 1st SITE pos         | NR           | R          | ND         |              | NR              | NR                   |                      |            |            |
|         | Week 10     |                      | NR           | R          | ND         | Detect, 97.8 | R               | NR                   | NEG                  |            |            |
|         | Interim**   |                      | NR           | NR         | ND         | Detect, 8.6  | NR              | NR                   | NEG                  |            |            |
|         | F/U Week 12 |                      |              |            |            |              | NR              | NR                   |                      |            |            |
|         | Interim     |                      | NR           |            |            |              | NR              | NR                   |                      |            |            |
|         | F/U Week 24 |                      |              |            |            |              | NR              | NR                   |                      |            |            |
|         | F/U Week 36 |                      |              |            |            |              | NR              | NR                   |                      |            |            |
|         | F/U Week 48 |                      |              |            |            |              | NR              | NR                   |                      |            |            |

\*\*Started ART with TDF/FTC/DRVr

HIV subtype B

WT

|                      |        |     |   |     |   |   |   |   |   |   |
|----------------------|--------|-----|---|-----|---|---|---|---|---|---|
| Ag/Ab test           | +      | -   | - | -   | + | - | - | - | - | - |
| Qualitative RNA test | +      | +   | - | +   | - | - | - | - | - | - |
| Confirmatory Ab test | -      |     |   |     | - |   |   |   |   | - |
| Viral load           | 44,180 | <40 |   | <40 |   |   |   |   |   |   |

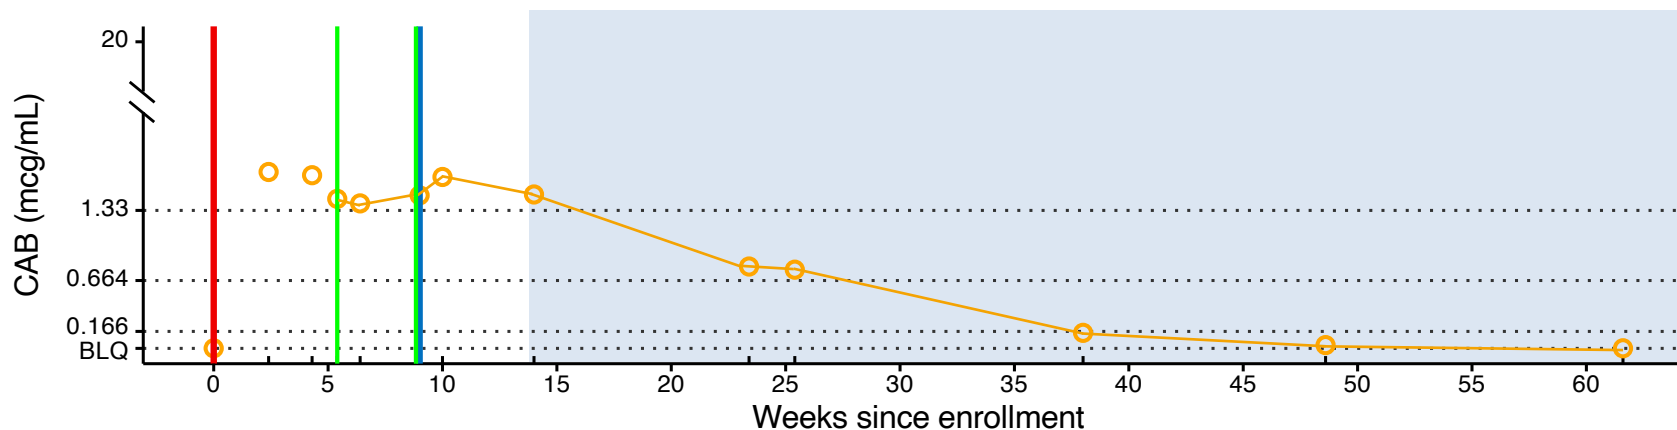

- CAB concentration
- CAB injection
- First HIV positive visit
- First site positive visit
- — First HIV positive visit and first site positive visit

# Case B1

| Visit type       | Diagnosis visit type | Site Testing |            |            |                      | HPTN LC Testing |                      |                      |            |             |
|------------------|----------------------|--------------|------------|------------|----------------------|-----------------|----------------------|----------------------|------------|-------------|
|                  |                      | Rapid 1 test | Ag/Ab test | Viral load | Confirmatory Ab test | Ag/Ab test      | Qualitative RNA test | Confirmatory Ab test | Viral load | Resistance  |
| Enrollment       |                      | NR           | NR         |            |                      | NR              | NR                   |                      |            |             |
| Week 2           |                      | NR           | NR         |            |                      |                 | NR                   |                      |            |             |
| Week 4           |                      | NR           | NR         |            |                      |                 | NR                   |                      |            |             |
| Week 5*          |                      | NR           | NR         |            |                      | NR              | NR                   |                      |            |             |
| Week 6           |                      | NR           | NR         |            |                      | NR              | NR                   |                      |            |             |
| Week 17*         |                      | NR           | NR         |            |                      | NR              | NR                   |                      |            |             |
| F/U Day 0        |                      | NR           | NR         |            |                      | NR              | NR                   |                      |            |             |
| F/U Week 12      |                      | NR           | NR         |            |                      | NR              | NR                   |                      |            |             |
| F/U Week 24      |                      | NR           | NR         |            |                      | NR              | NR                   |                      |            |             |
| F/U Week 36      |                      |              |            |            |                      | NR              | NR                   |                      |            |             |
| F/U Week 48      |                      | NR           | NR         |            |                      | NR              | NR                   |                      |            |             |
| Yearly visit 1** | 1st HIV/SITE pos     | R            | R          | 103,000    |                      | R               | R                    | POS                  | 65,530     | Y181C+H221Y |
| Yearly visit 1   |                      | R            | R          | 80,600     | POS                  | R               | R                    | POS                  | 46,230     |             |

\*\*Started ART with TAF/FTC/DRVc; viral load 608 after 3 months on ART

HIV subtype B

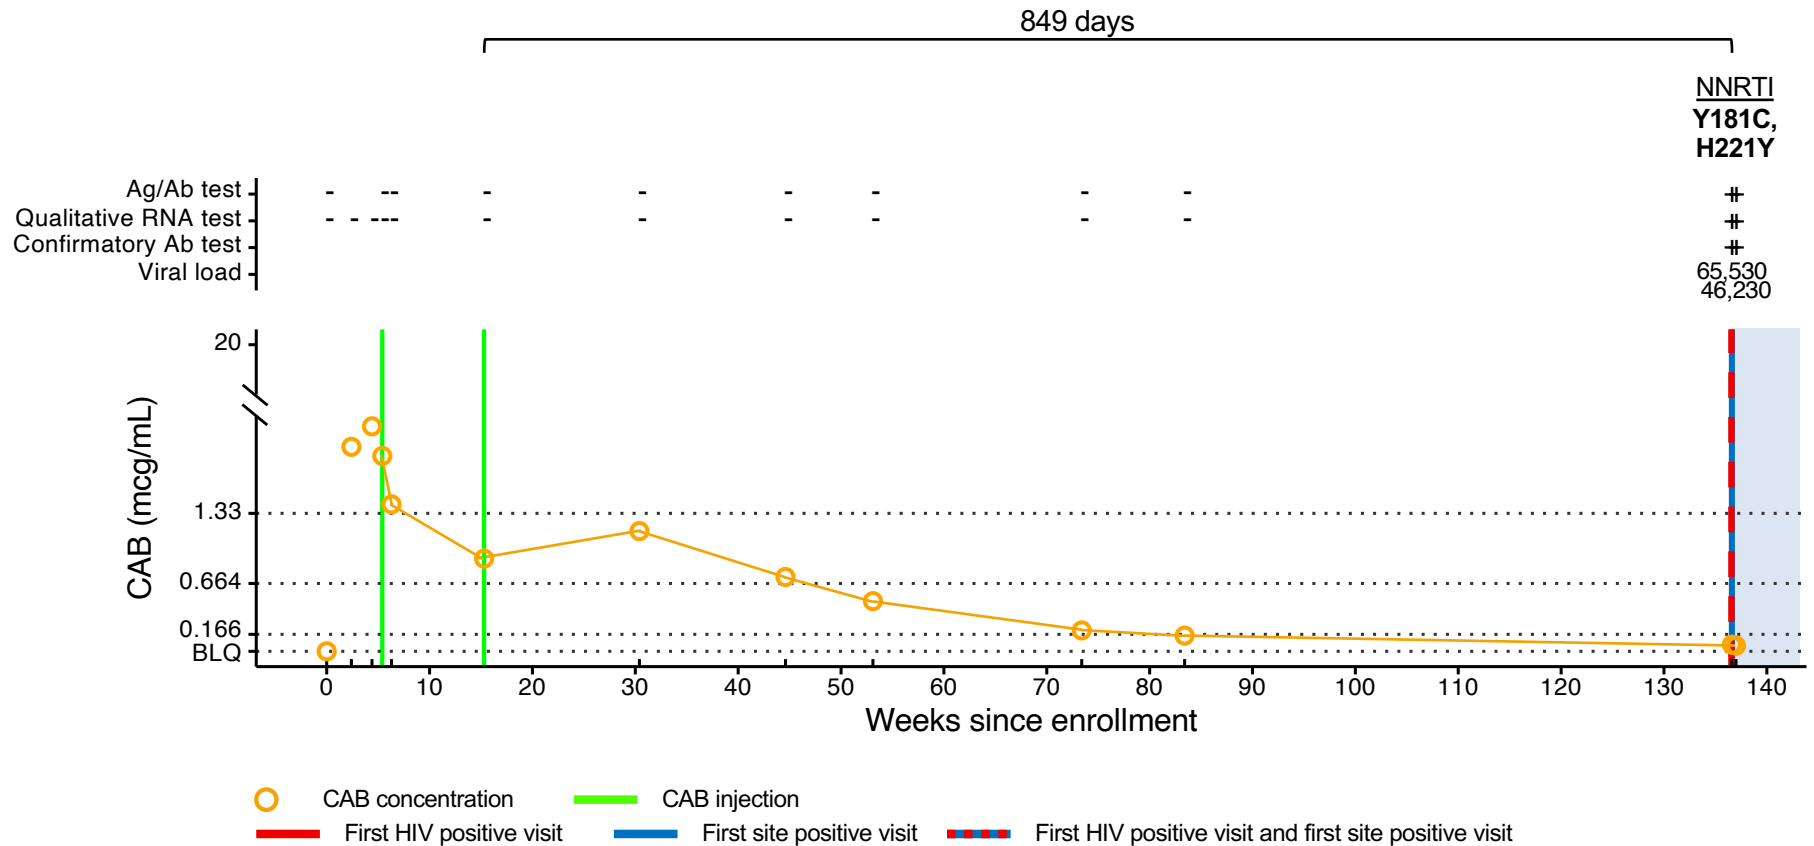

# Case B2

| Visit type       | Diagnosis visit type | Site Testing |              |            |            | HPTN LC Testing |                      |                      |            |            |
|------------------|----------------------|--------------|--------------|------------|------------|-----------------|----------------------|----------------------|------------|------------|
|                  |                      | Rapid 1 test | Rapid 2 test | Ag/Ab test | Viral load | Ag/Ab test      | Qualitative RNA test | Confirmatory Ab test | Viral load | Resistance |
| Enrollment       |                      | NR           |              | NR         |            | NR              | NR                   |                      |            |            |
| Week 2           |                      | NR           |              | NR         |            | NR              | NR                   |                      |            |            |
| Yearly visit 1   |                      | NR           |              | NR         |            | NR              | NR                   |                      |            |            |
| Yearly visit 2** | 1st HIV/SITE pos     | R            | R            | R          | 47,742     | R               | R                    | POS                  | 53220      | WT         |

\*\*Started ART 1 day later (TDF/FTC/EFV→TDF/FTC/RPV); viral load <20 after 5 months on ART

HIV subtype A/B

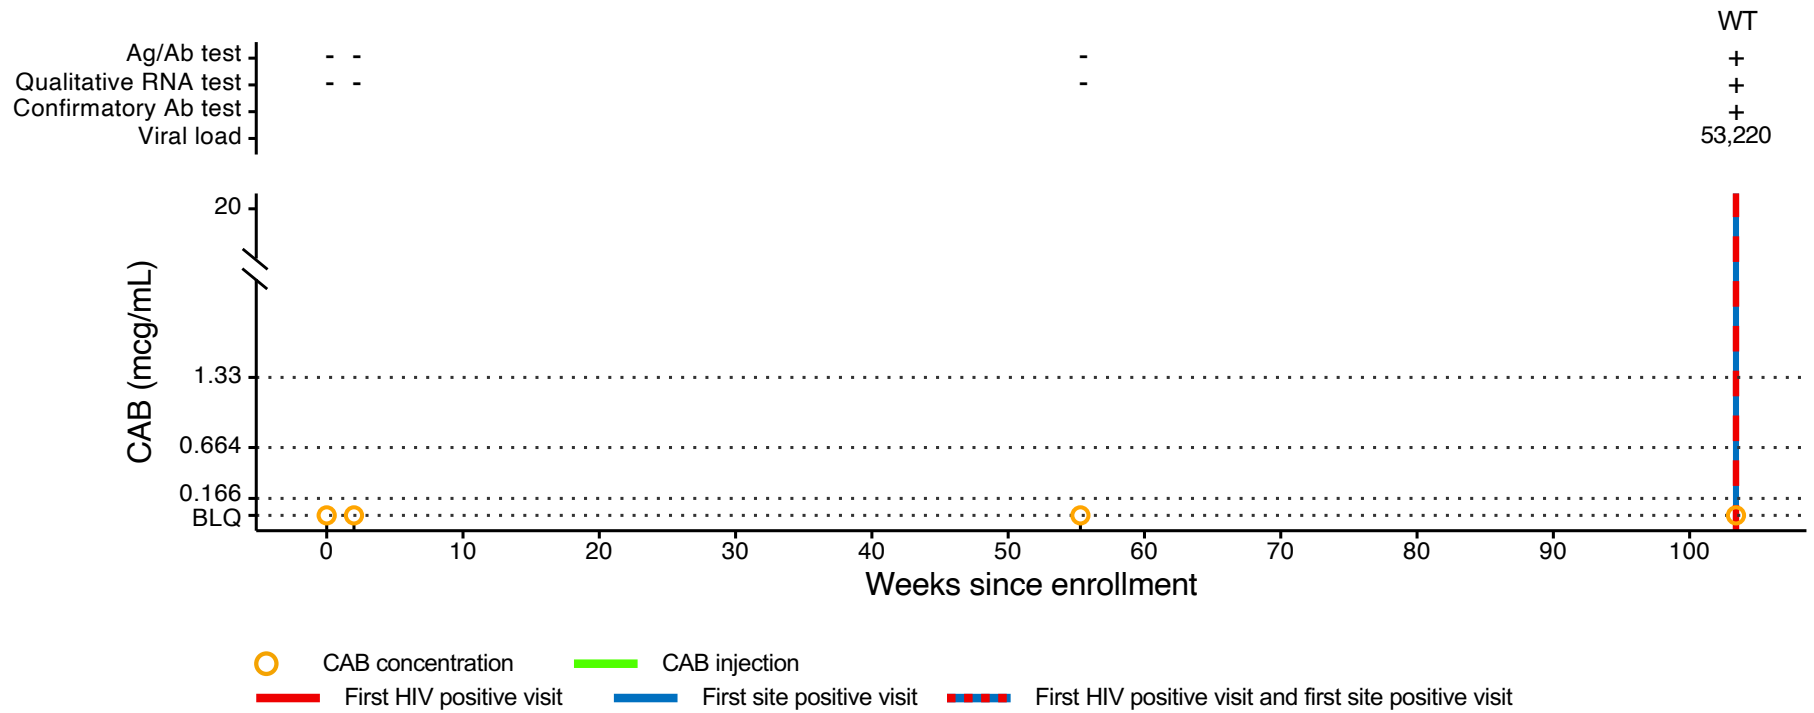

# Case B3

| Visit type | Diagnosis visit type | Site Testing |            |            | HPTN LC Testing |                      |                      |            |            |
|------------|----------------------|--------------|------------|------------|-----------------|----------------------|----------------------|------------|------------|
|            |                      | Rapid 1 test | Ag/Ab test | Viral load | Ag/Ab test      | Qualitative RNA test | Confirmatory Ab test | Viral load | Resistance |
| Enrollment |                      | NR           | NR         |            | NR              | NR                   |                      |            |            |
| Week 2     |                      | NR           | NR         |            |                 | NR                   |                      |            |            |
| Week 4     |                      | NR           | NR         |            |                 | NR                   |                      |            |            |
| Week 5*    |                      | NR           | NR         |            |                 | NR                   |                      |            |            |
| Week 6     |                      | NR           | NR         |            |                 | NR                   |                      |            |            |
| Week 9*    |                      | NR           | NR         |            |                 | NR                   |                      |            |            |
| Week 10    |                      | NR           | NR         |            |                 | NR                   |                      |            |            |
| Week 17*   |                      | NR           | NR         |            |                 | NR                   |                      |            |            |
| Week 19    |                      | NR           | NR         |            | NR              | NR                   |                      |            |            |
| Week 25*   |                      | NR           | NR         |            | NR              | NR                   |                      |            |            |
| Week 27    |                      | NR           | NR         |            | NR              | NR                   |                      |            |            |
| Interim    | 1st HIV/SITE pos     | R            | R          | 48500      | R               | R                    | INDET                | 50,440     | WT         |
| Interim**  |                      | R            | R          | 69200      | R               | R                    | POS                  | 93,510     |            |

\*\*Started ART with TDF/3TC/EFV

HIV subtype A/E

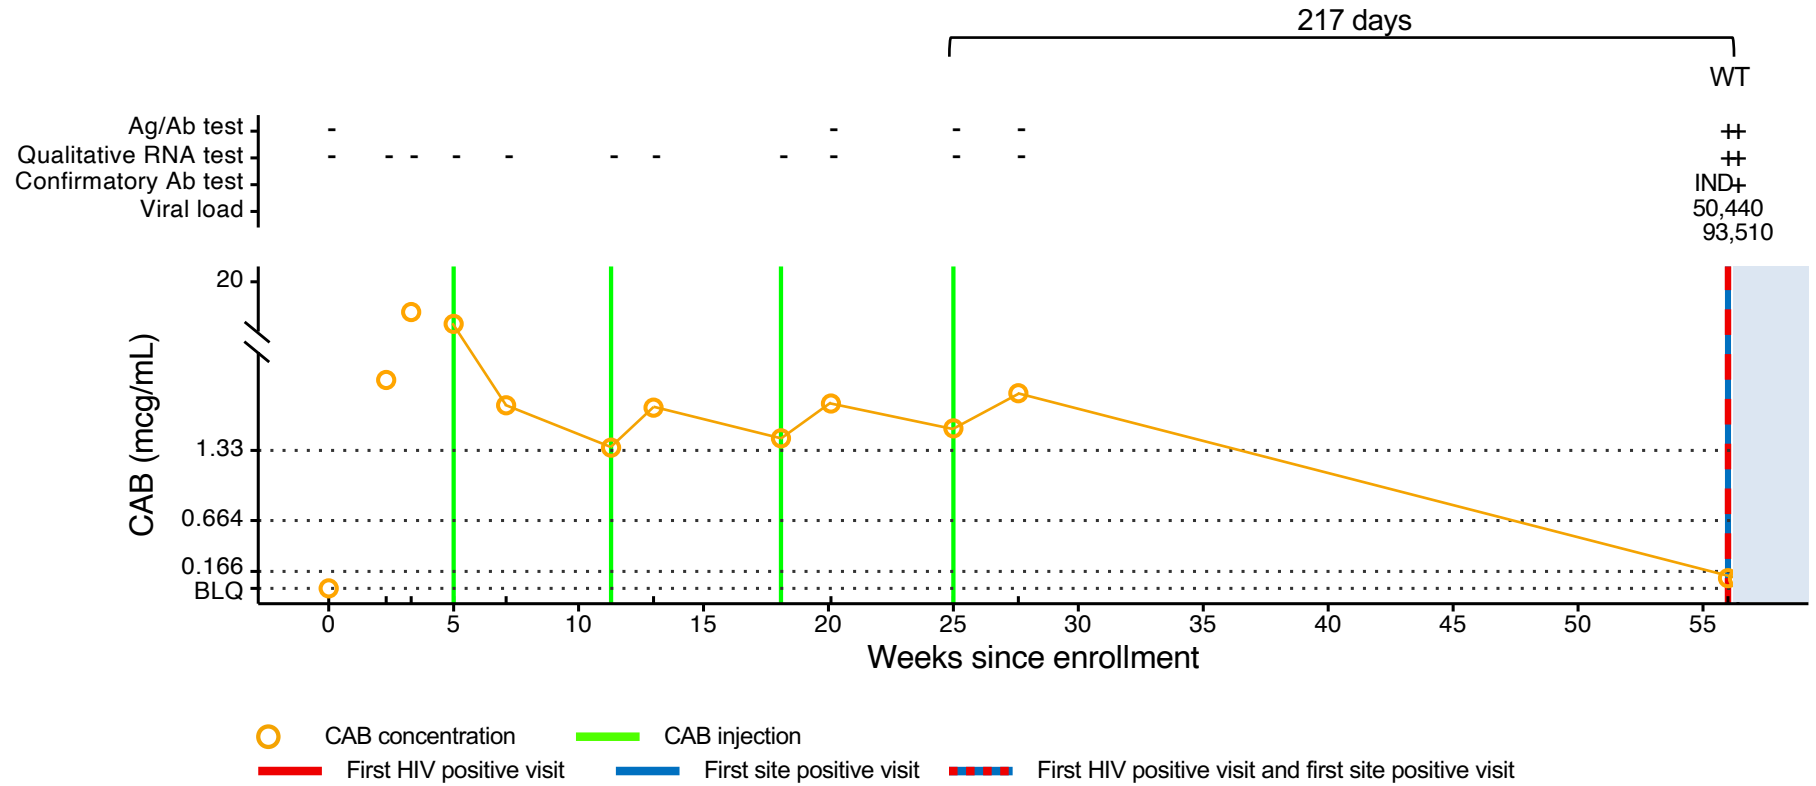

# Case B4

| Visit type  | Diagnosis visit type | Site Testing |            |          |              |            | HPTN LC Testing |                      |                      |            |                |
|-------------|----------------------|--------------|------------|----------|--------------|------------|-----------------|----------------------|----------------------|------------|----------------|
|             |                      | Rapid 1 test | Ag/Ab test | RNA test | DNA test     | Viral load | Ag/Ab test      | Qualitative RNA test | Confirmatory Ab test | Viral load | Resistance     |
| Enrollment  |                      | NR           | NR         |          |              |            | NR              | NR                   |                      |            |                |
| Week 2      |                      | NR           | NR         |          |              |            |                 | NR                   |                      |            |                |
| Week 4      |                      | NR           | NR         |          |              |            |                 | NR                   |                      |            |                |
| Week 5*     |                      | NR           | NR         |          |              |            |                 | NR                   |                      |            |                |
| Week 6      |                      | NR           | NR         |          |              |            |                 | NR                   |                      |            |                |
| Week 9*     |                      | NR           | NR         |          |              |            |                 | NR                   |                      |            |                |
| Week 10     |                      | NR           | NR         |          |              |            |                 | NR                   |                      |            |                |
| Week 17*    |                      | NR           | NR         |          |              |            |                 | NR                   |                      |            |                |
| Week 19     |                      | NR           | NR         |          |              |            |                 | NR                   |                      |            |                |
| F/U Day 0   |                      | NR           | NR         |          |              |            | NR              | NR                   |                      |            |                |
| F/U Week 12 |                      | NR           | NR         |          |              |            | NR              | NR                   |                      |            |                |
| F/U Week 24 |                      | NR           | NR         |          |              |            | NR              | NR                   |                      |            |                |
| Interim**   | 1st HIV/SITE pos     | R            | R          |          |              | 828        | R               | R                    | POS                  | 770        | Failed testing |
| Interim     |                      | R            | R          |          | Detect, >100 | 244        | R               | R                    | POS                  | 410        |                |
| F/U Week 36 |                      |              |            |          |              |            |                 |                      |                      | ND         |                |
| F/U Week 48 |                      |              | R          | R        |              | 26         |                 |                      |                      | <40        |                |

\*\*Started ART 10 days earlier with TAF/FTC/BIC; viral load 26 after 5 months on ART

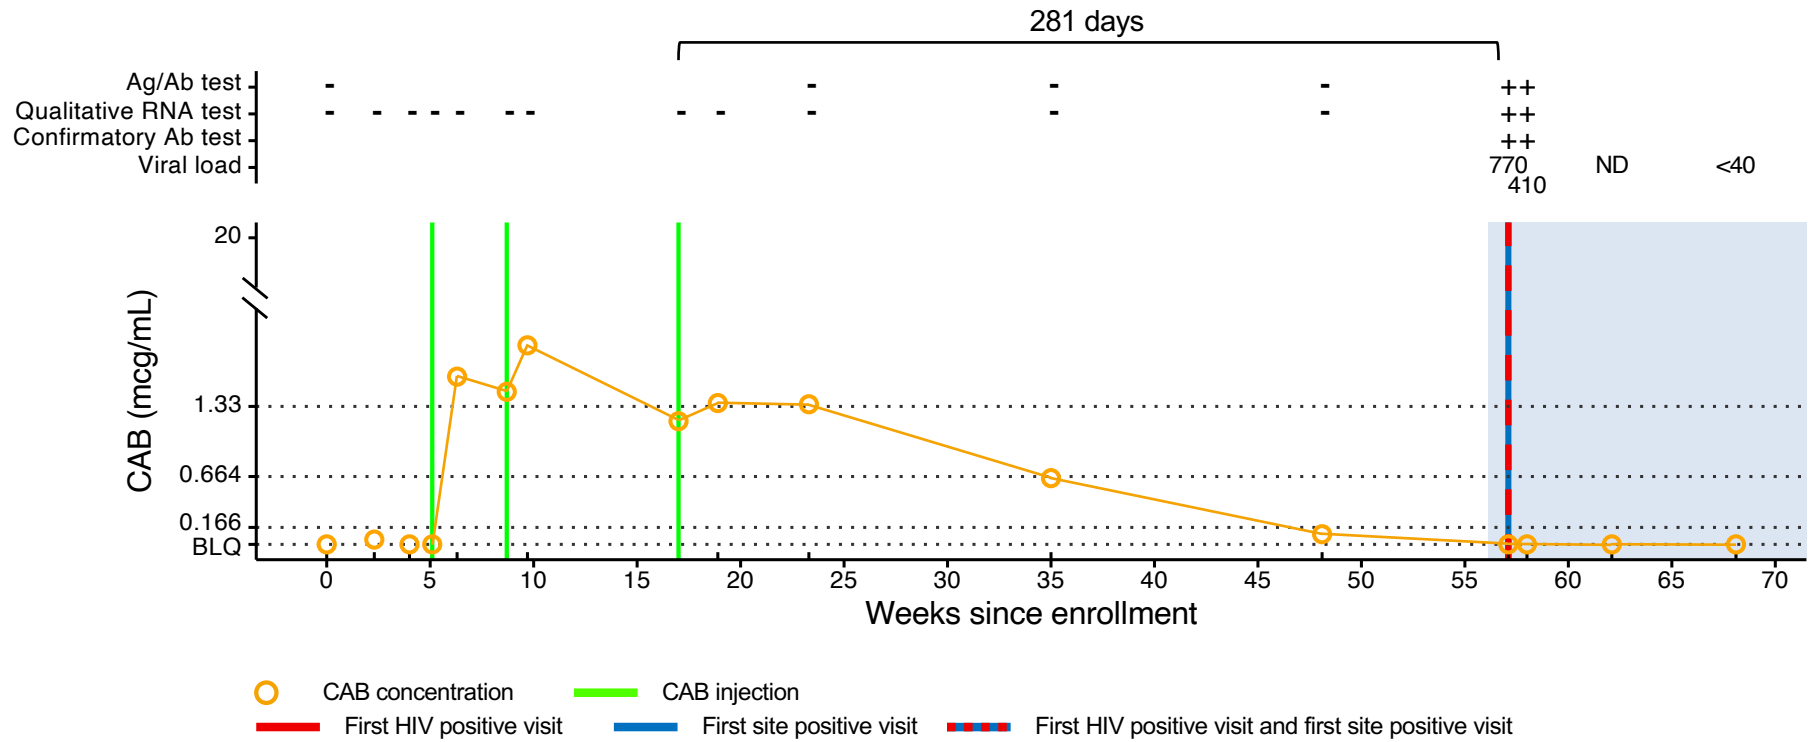

# Case B5

| Visit type | Diagnosis visit type | Site Testing |            |            |                      | HPTN LC Testing |                      |                      |            |            |
|------------|----------------------|--------------|------------|------------|----------------------|-----------------|----------------------|----------------------|------------|------------|
|            |                      | Rapid 1 test | Ag/Ab test | Viral load | Confirmatory Ab test | Ag/Ab test      | Qualitative RNA test | Confirmatory Ab test | Viral load | Resistance |
| Enrollment |                      | NR           | NR         |            |                      | NR              | NR                   |                      |            |            |
| Week 2     |                      | NR           | NR         |            |                      | NR              | NR                   |                      |            |            |
| Week 4     |                      | NR           | NR         |            |                      | NR              | NR                   |                      |            |            |
| Interim**  | 1st HIV/SITE pos     |              | R          | 3,300      | POS                  | R               | R                    | POS                  | 2,559      | WT         |

\*\*Started ART with TAF/FTC/BIC; viral load <20 after 1 month on ART

HIV subtype B

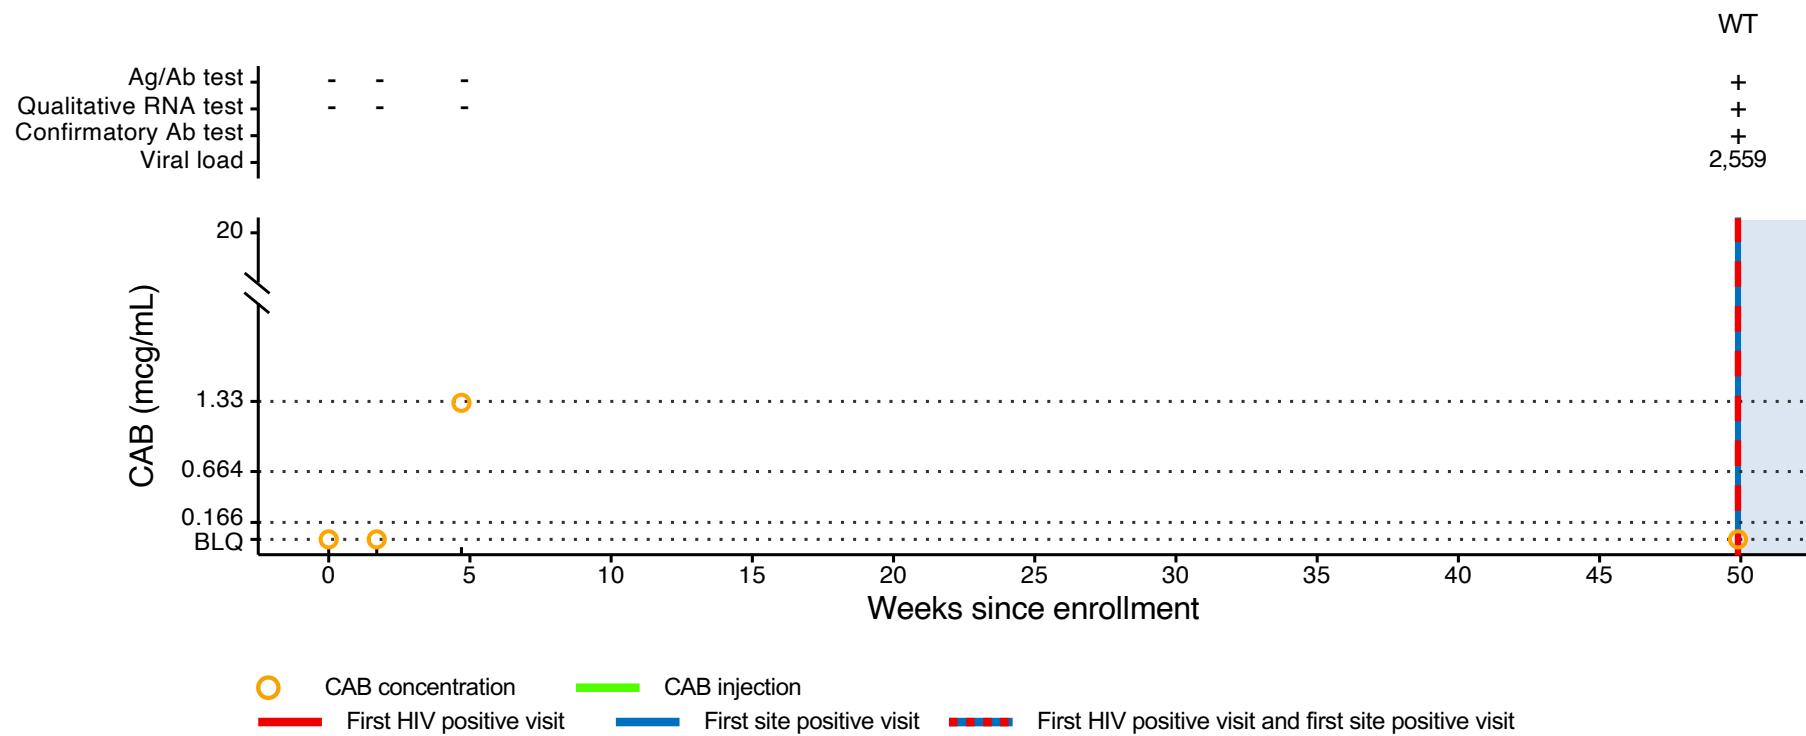



# Case C1

|         | Visit type | Diagnosis visit type | Site Testing |            |              |            | HPTN LC Testing      |            |                      |                      |            |                                    |
|---------|------------|----------------------|--------------|------------|--------------|------------|----------------------|------------|----------------------|----------------------|------------|------------------------------------|
|         |            |                      | Rapid 1 test | Ag/Ab test | DNA test     | Viral load | Confirmatory Ab test | Ag/Ab test | Qualitative RNA test | Confirmatory Ab test | Viral load | Resistance                         |
|         | Enrollment |                      | NR           | NR         |              |            |                      | NR         | Inconclusive         |                      | SCA NEG    |                                    |
|         | Week 2     |                      | NR           | NR         |              |            |                      | NR         | NR                   |                      |            |                                    |
| 47 days | Week 4     | 1st HIV POS          | NR           | NR         |              |            |                      | NR         | R                    |                      | 120        |                                    |
|         | Week 5*    |                      | NR           | NR         |              |            |                      | NR         | R                    |                      | 161        |                                    |
|         | Week 6     |                      | NR           | NR         |              |            |                      | NR         | R                    |                      | 137        |                                    |
|         | Week 9*    |                      | NR           | NR         |              |            |                      | NR         | R                    |                      | 2,174      | L74I+Q148R                         |
|         | Week 10    | 1st SITE POS         | NR           | R          |              | 1,139      |                      | R          | R                    | NEG                  | 1,373      | L74I+E138E/K+<br>G140G/S+<br>Q148R |
|         | Week 10    |                      | NR           | R          | Detect, 81.5 | 1,911      | NEG                  | NR         | R                    | NEG                  | 2,549      |                                    |

ART status not known HIV subtype B

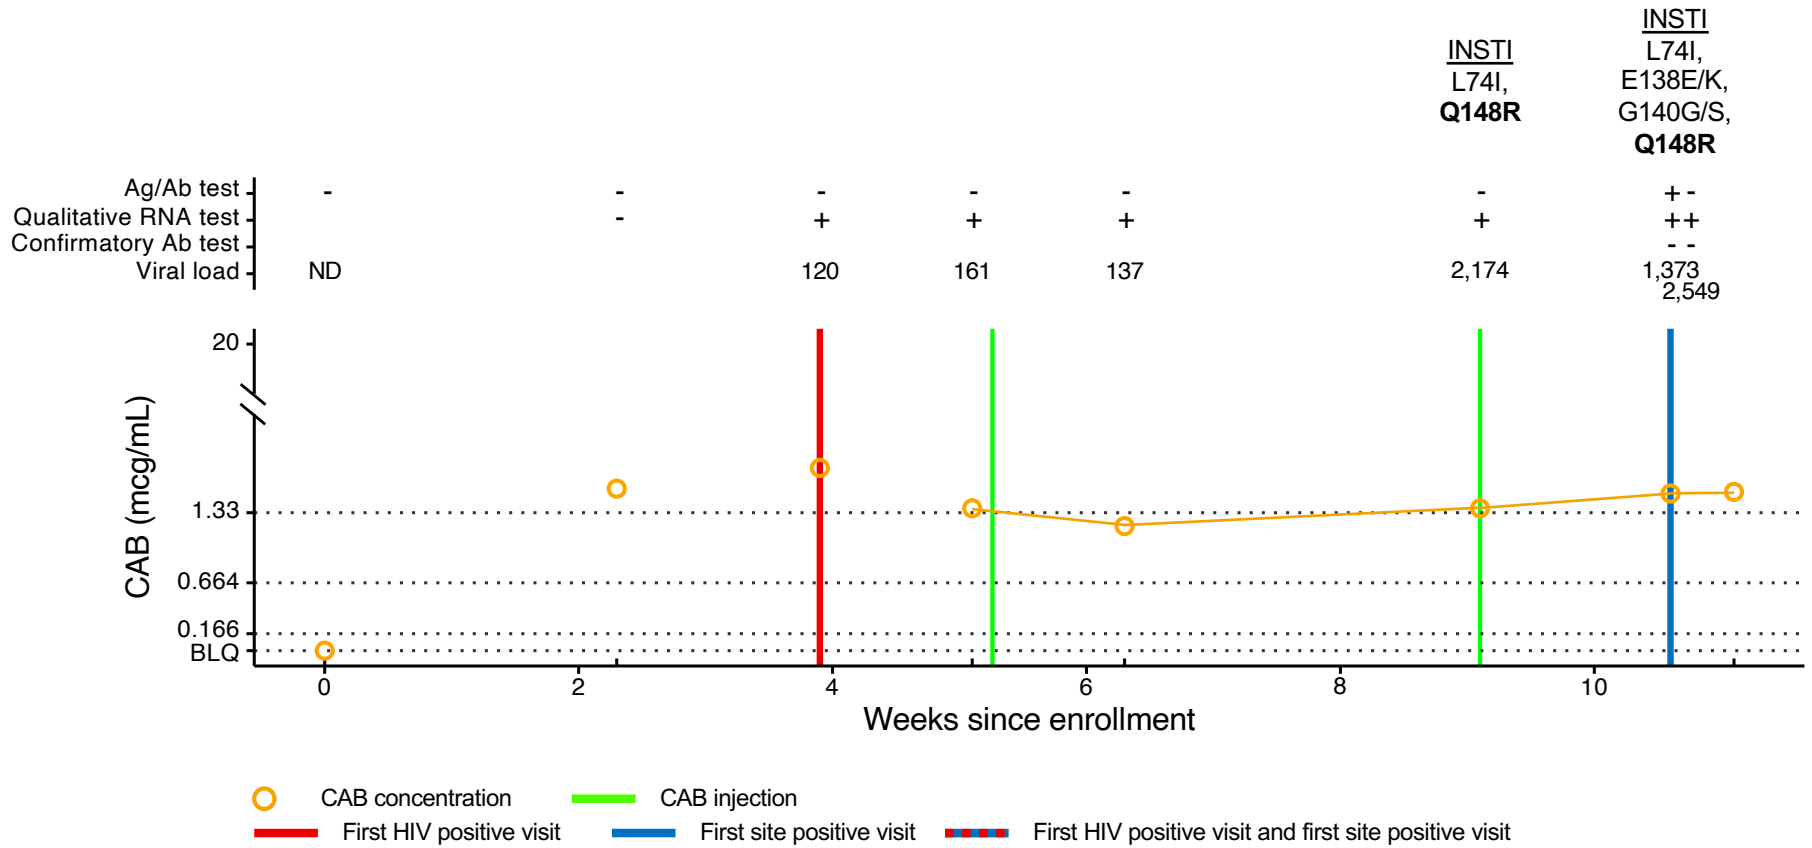

# Case C2

|          | Visit type | Diagnosis visit type | Site Testing |            |            | HPTN LC Testing      |            |                      |                      |            |            |
|----------|------------|----------------------|--------------|------------|------------|----------------------|------------|----------------------|----------------------|------------|------------|
|          |            |                      | Rapid 1 test | Ag/Ab test | Viral load | Confirmatory Ab test | Ag/Ab test | Qualitative RNA test | Confirmatory Ab test | Viral load | Resistance |
| 185 days | Enrollment |                      | NR           | NR         |            |                      | NR         | NR                   |                      | SCA NEG    |            |
|          | Week 2     |                      | NR           | NR         |            |                      | NR         | NR                   |                      |            |            |
|          | Week 4     | 1st HIV pos          | NR           | NR         |            |                      | NR         | R                    |                      | 494        |            |
|          | Interim    | 1st SITE pos         | R            | R          | 574,646    | POS                  | R          | R                    | POS                  | 229,810    | WT         |
|          | Interim**  |                      | R            | R          | 326,823    |                      | R          | R                    | POS                  | 207,810    |            |

\*\*Started ART 1 day later with TDF/FTC/EFV; viral load 78 after 7 months on ART

HIV subtype B/F

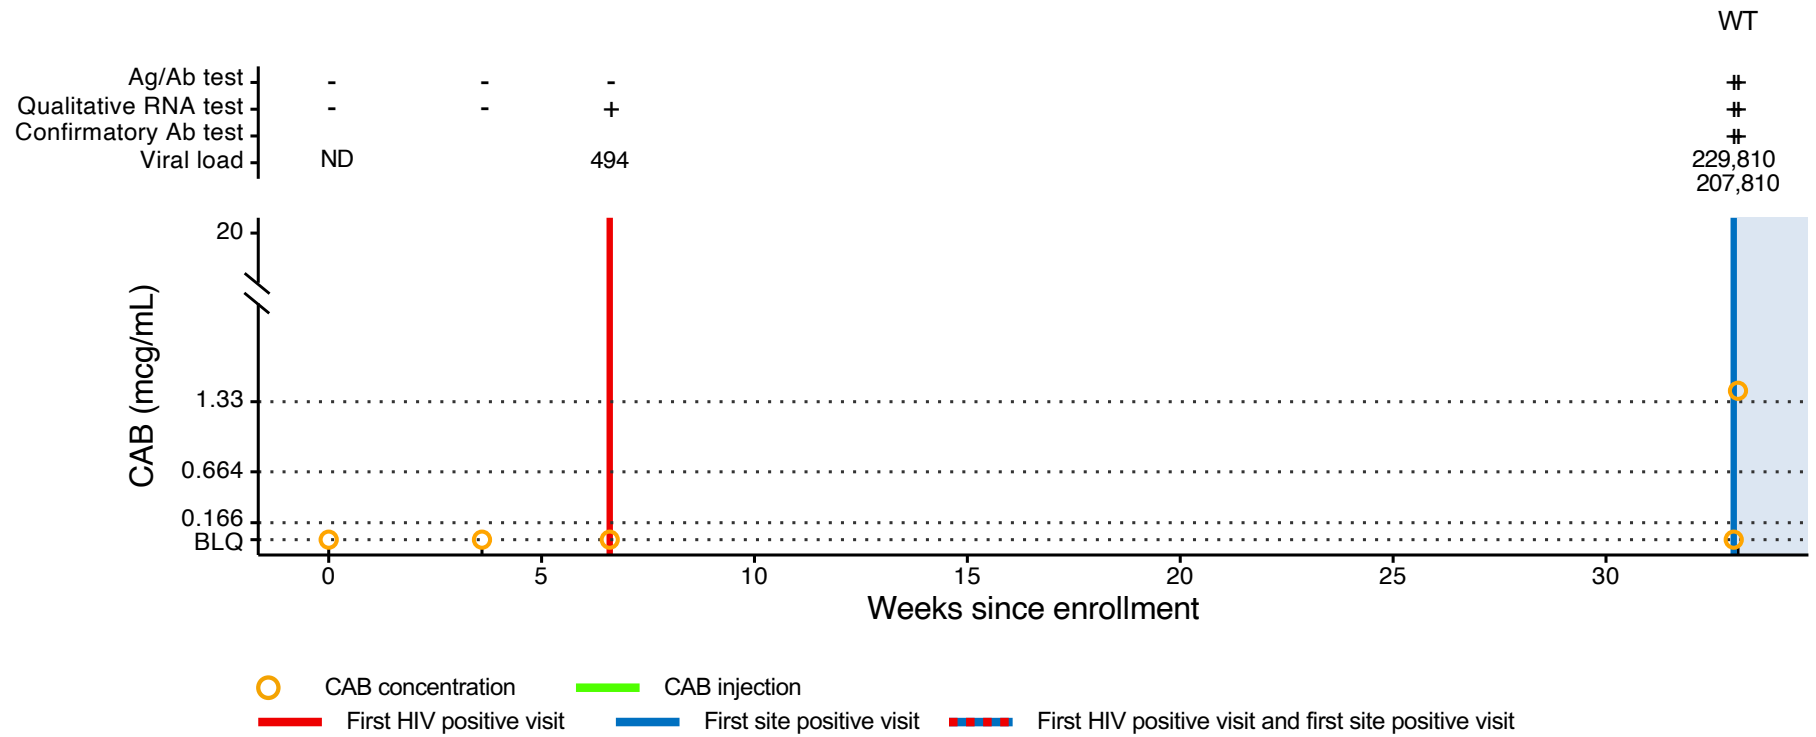

# Case C3

|         | Visit type  | Diagnosis visit type | Site Testing |              |            |            | HPTN LC Testing |                      |                      |            |             |
|---------|-------------|----------------------|--------------|--------------|------------|------------|-----------------|----------------------|----------------------|------------|-------------|
|         |             |                      | Rapid 1 test | Rapid 2 test | Ag/Ab test | Viral load | Ag/Ab test      | Qualitative RNA test | Confirmatory Ab test | Viral load | Resistance  |
| 35 days | Enrollment  |                      | NR           | NR           | NR         |            | NR              | NR                   |                      | SCA NEG    |             |
|         | Interim     | 1st HIV pos          | NR           | NR           | NR         |            | NR              | R                    |                      | SCA 15.3   |             |
|         | Week 4      |                      | NR           | NR           | NR         |            | NR              | R                    |                      | <40        |             |
|         | Week 5*     |                      | NR           | NR           | NR         |            | NR              | NR                   |                      | ND         |             |
|         | Week 6      |                      | NR           | NR           | NR         |            | NR              | R                    |                      | 99         |             |
|         | Week 9      | 1st SITE pos         | R            | R            | R          |            | R               | R                    | INDET                | 102,329    | E138A+Q148R |
|         | Interim**   |                      | R            | R            | R          | 379,978    | R               | R                    | POS                  | 218,776    |             |
|         | F/U Week 12 |                      |              |              |            |            |                 |                      |                      | 375        |             |
|         | F/U Week 24 |                      |              |              |            | ND         |                 |                      |                      | <40        |             |
|         | Interim     |                      |              |              |            |            |                 |                      |                      | ND         |             |
|         | F/U Week 48 |                      |              |              |            | ND         |                 |                      |                      | ND         |             |

\*\*Started ART start 9 days later with TDF/FTC/EFV HIV subtype B

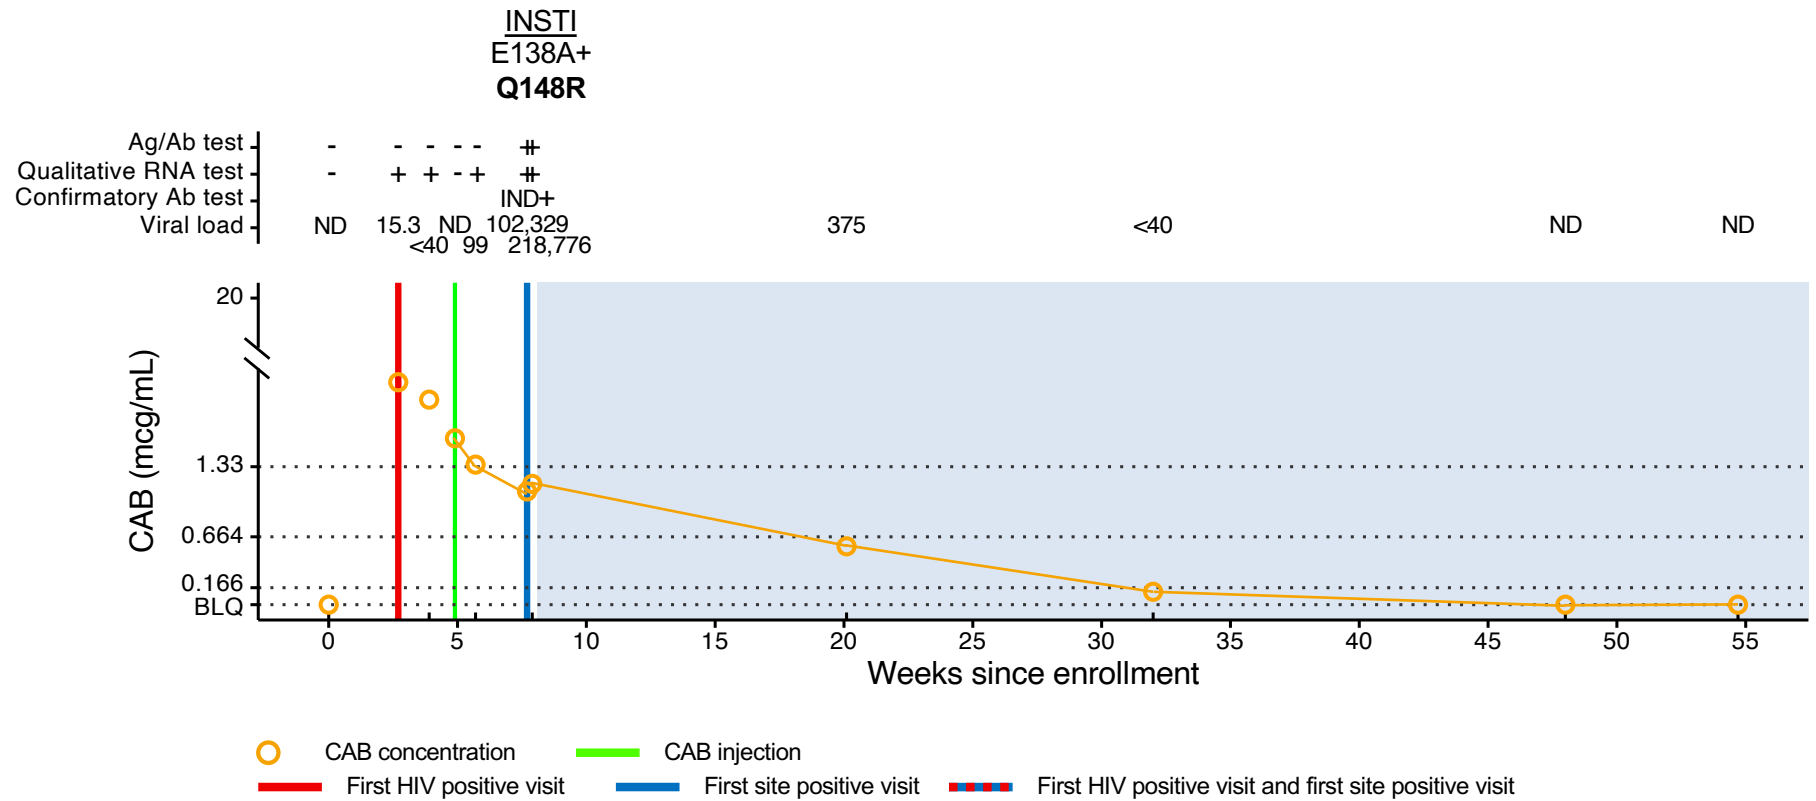

# Case D1

| Visit type  | Diagnosis visit type | Site Testing |            |            | HPTN LC Testing |                      |                      |            |
|-------------|----------------------|--------------|------------|------------|-----------------|----------------------|----------------------|------------|
|             |                      | Rapid 1 test | Ag/Ab test | Viral load | Ag/Ab test      | Qualitative RNA test | Confirmatory Ab test | Viral load |
| Enrollment  |                      | NR           | NR         |            | NR              | NR                   |                      |            |
| Week 2      |                      | NR           | NR         |            |                 | NR                   |                      |            |
| Week 4      |                      | NR           | NR         |            |                 | NR                   |                      |            |
| Week 5*     |                      | NR           | NR         |            |                 | NR                   |                      |            |
| Week 6      |                      | NR           | NR         |            |                 | NR                   |                      |            |
| Week 9*     |                      | NR           | NR         |            |                 | NR                   |                      |            |
| Week 10     |                      | NR           | NR         |            |                 | NR                   |                      |            |
| Week 17*    |                      | NR           | NR         |            |                 | NR                   |                      |            |
| Week 19     |                      | NR           | NR         |            |                 | NR                   |                      |            |
| Week 25*    |                      | NR           | NR         |            |                 | NR                   |                      |            |
| Week 27     |                      | NR           | NR         |            |                 | NR                   |                      |            |
| Week 33*    |                      | NR           | NR         |            |                 | NR                   |                      |            |
| Week 35     |                      | NR           | NR         |            |                 | NR                   |                      |            |
| Week 41*    |                      | NR           | NR         |            |                 | NR                   |                      |            |
| Week 43     |                      | NR           | NR         |            | NR              | NR                   |                      |            |
| Week 49*    |                      | NR           | NR         |            | NR              | NR                   |                      |            |
| Week 51     |                      | NR           | NR         |            | NR              | NR                   |                      |            |
| Week 57*    | 1st HIV pos          | NR           | NR         |            | NR              | R                    |                      | 130        |
| Week 59     |                      | NR           | NR         |            | NR              | R                    |                      | 163        |
| Week 65*    |                      | NR           | NR         |            | NR              | R                    |                      | 87         |
| Week 67     |                      | NR           | NR         |            | NR              | R                    |                      | 71         |
| Week 73***  | 1st SITE pos         | NR           | R          |            | R               | R                    | POS                  | <40        |
| F/U Day 0** |                      |              | R          | 48         | R               | R                    | POS                  | <40        |
| F/U Week 12 |                      |              |            |            |                 |                      |                      | ND         |
| F/U Week 48 |                      |              |            | ND         |                 |                      |                      | ND         |

112 days

\*\*Started ART 4 days later with TAF/FTC/DRVc

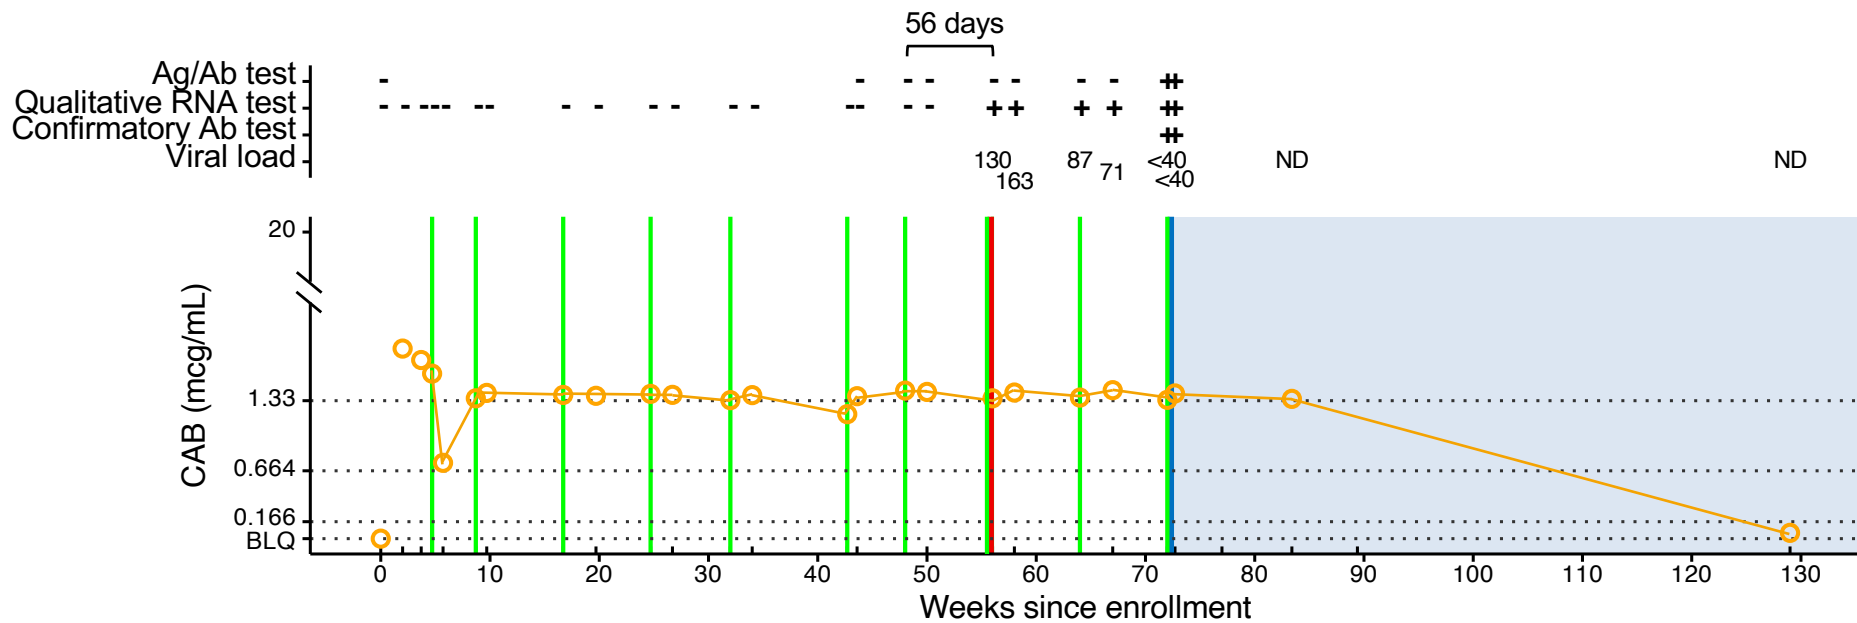

# Case D2

| Visit type    | Diagnosis visit type | Site Testing |            |               |            |                      | HPTN LC Testing |                      |                      |            |  |
|---------------|----------------------|--------------|------------|---------------|------------|----------------------|-----------------|----------------------|----------------------|------------|--|
|               |                      | Rapid 1 test | Ag/Ab test | DNA test      | Viral load | Confirmatory Ab test | Ag/Ab test      | Qualitative RNA test | Confirmatory Ab test | Viral load |  |
| Enrollment    |                      | NR           | NR         |               |            |                      | NR              | NR                   |                      |            |  |
| Week 2        |                      | NR           | NR         |               |            |                      |                 | NR                   |                      |            |  |
| Week 4        |                      | NR           | NR         |               |            |                      |                 | NR                   |                      |            |  |
| Week 5*       |                      | NR           | NR         |               |            |                      |                 | NR                   |                      |            |  |
| Week 6        |                      | NR           | NR         |               |            |                      |                 | NR                   |                      |            |  |
| Week 9*       |                      | NR           | NR         |               |            |                      |                 | NR                   |                      |            |  |
| Week 10       |                      | NR           | NR         |               |            |                      |                 | NR                   |                      |            |  |
| Week 17*      |                      | NR           | NR         |               |            |                      | NR              | NR                   |                      |            |  |
| Week 19       |                      | NR           | NR         |               |            |                      | NR              | NR                   |                      |            |  |
| Week 25*      |                      | NR           | NR         |               |            |                      | NR              | NR                   |                      |            |  |
| Week 27       | 1st HIV POS          | NR           | NR         |               |            |                      | NR              | R                    |                      | SCA 6.1    |  |
| Week 33*      |                      | NR           | NR         |               |            |                      | NR              | NR                   |                      |            |  |
| Week 35       |                      | NR           | NR         |               |            |                      | NR              | R                    |                      | ND         |  |
| Week 41*      | 1st SITE POS         | NR           | R          |               | ND         |                      | NR              | NR                   |                      |            |  |
| Interim visit |                      | R            | R          | Detect, <LLOD | ND         |                      | R               | NR                   | NEG                  |            |  |
| Interim visit |                      | NR           | R          |               |            |                      | R               | NR                   | NEG                  |            |  |
| Week 43       |                      | NR           | R          |               |            |                      | NR              | NR                   |                      |            |  |
| Interim       |                      | NR           | R          | ND            | ND         |                      | R               | NR                   | INDET                |            |  |
| Interim**     |                      | R            | R          | Detect, <LLOD | ND         |                      | NR              | NR                   |                      |            |  |
| Interim       |                      | NR           | R          |               |            |                      | R               | NR                   | INDET                |            |  |
| Interim       |                      | NR           | R          | Detect, 5.8   | 23         | POS                  | R               | R                    | NEG                  | <40        |  |
| Interim       |                      | R            | R          |               | 23         |                      | R               | R                    | INDET                | <40        |  |

\*\*Started a 30-day course of TDF/3TC/DRVr 7 days later for PEP; later started ART with TDF/3TC/DRVr with a viral load of 1700

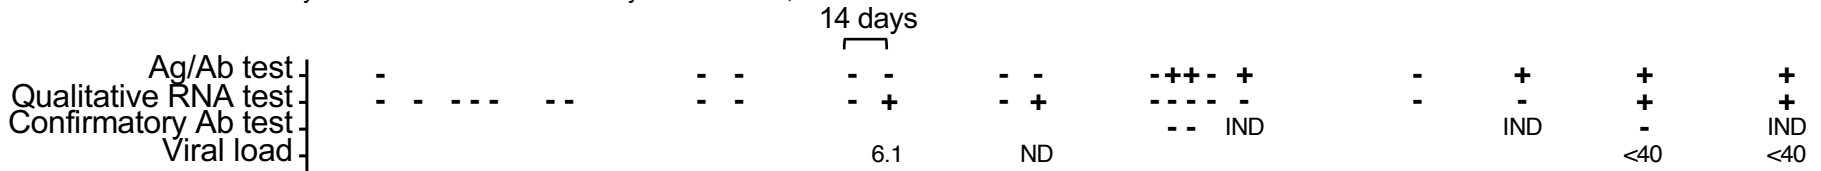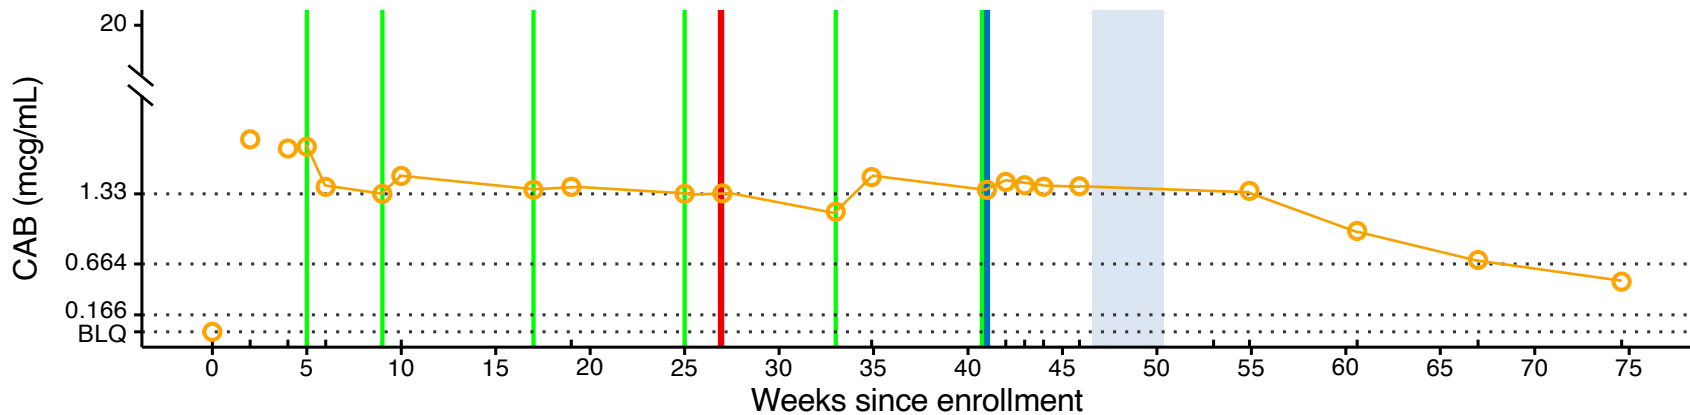

# Case D3

| Visit type | Diagnosis visit type    | Site Testing |            |            | HPTN LC Testing |                      |                      |            |              |
|------------|-------------------------|--------------|------------|------------|-----------------|----------------------|----------------------|------------|--------------|
|            |                         | Rapid 1 test | Ag/Ab test | Viral load | Ag/Ab test      | Qualitative RNA test | Confirmatory Ab test | Viral load | Resistance   |
| Enrollment |                         | NR           | NR         |            | NR              | NR                   |                      |            |              |
| Week 2     |                         | NR           | NR         |            |                 | NR                   |                      |            |              |
| Week 4     |                         | NR           | NR         |            |                 | NR                   |                      |            |              |
| Week 5*    |                         | NR           | NR         |            |                 | NR                   |                      |            |              |
| Week 6     |                         | NR           | NR         |            | NR              | NR                   |                      |            |              |
| Week 9*    |                         | NR           | NR         |            | NR              | NR                   |                      |            |              |
| Week 10    |                         | NR           | NR         |            | NR              | NR                   |                      |            |              |
| Week 17*   | 1 <sup>st</sup> HIV pos | NR           | NR         |            | NR              | R                    |                      | 860        | K103N        |
| Week 19    |                         | NR           | NR         |            | NR              | R                    |                      | ND         |              |
| Week 25*   |                         | NR           | NR         |            | NR              | R                    |                      | <40        |              |
| Week 27    |                         | NR           | NR         |            | NR              | R                    |                      | 112        |              |
| Week 33*   |                         | NR           | INDET      |            | R               | R                    | NEG                  | 7160       | K103N, R263K |
| Week 33**  | 1st SITE pos            | R            | INDET      | 4,628      | R               | R                    | INDET                | 5,510      |              |
| Interim    |                         |              |            | ND         |                 |                      |                      |            |              |

117 days

\*\*Started ART with TDF/3TC/DRVr; virally suppressed after 1 month on ART

HIV subtype B/F

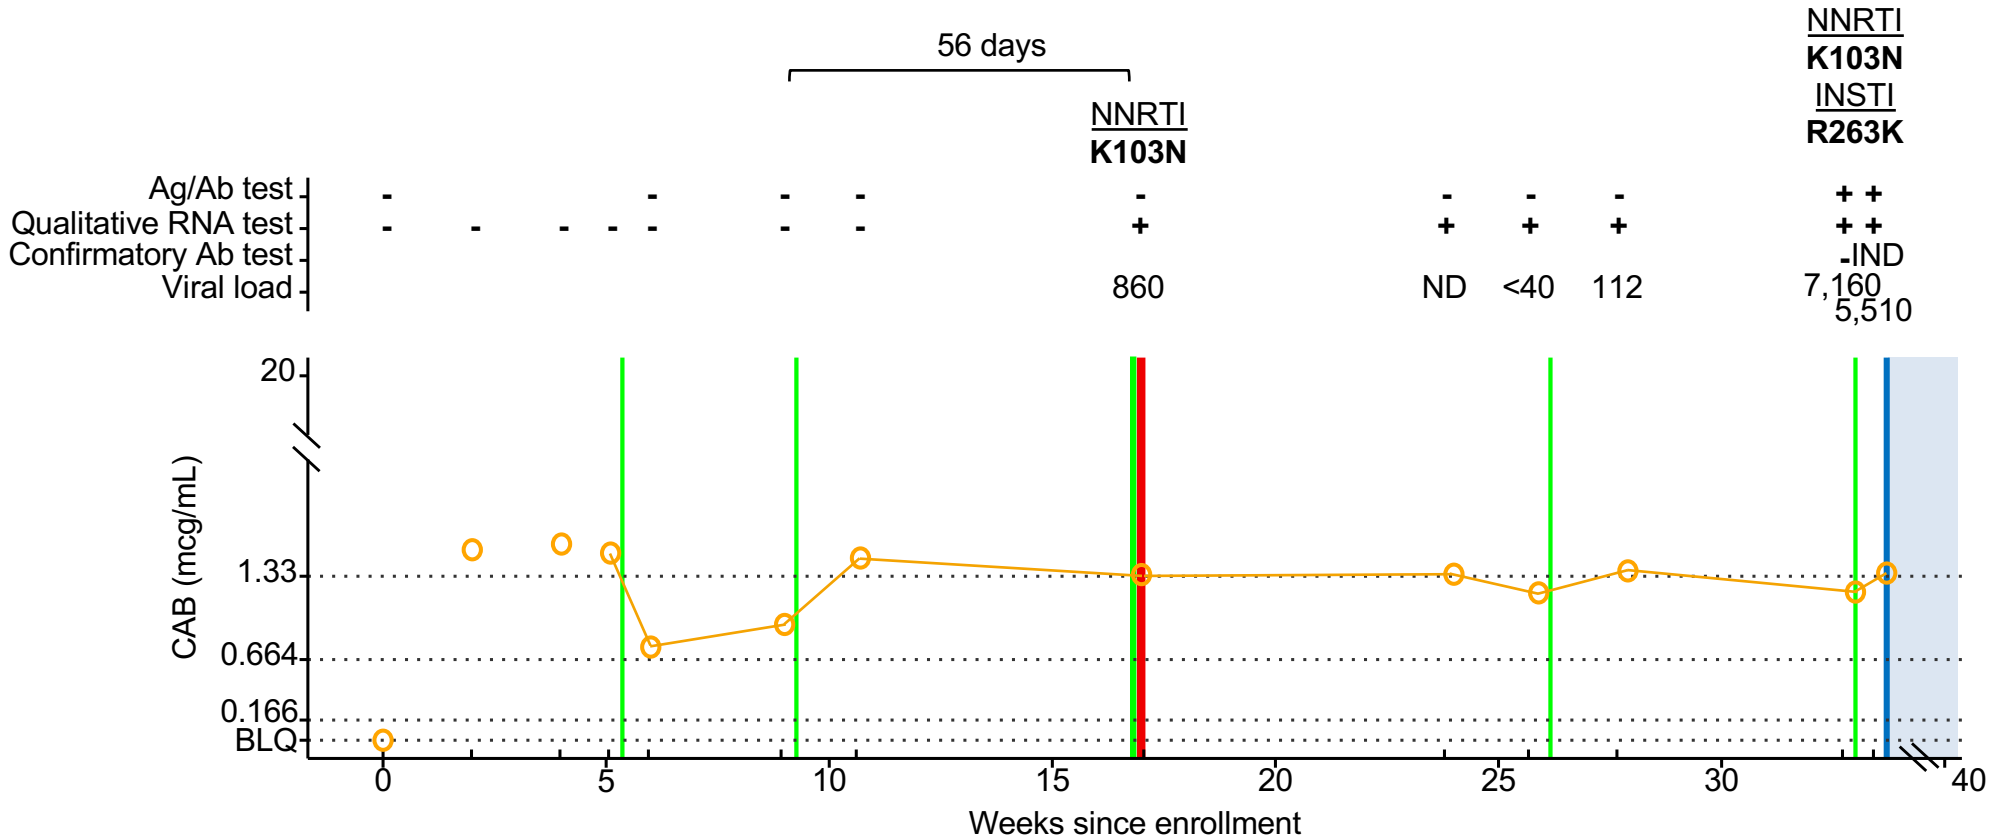

# Case D4

| Visit type        | Diagnosis visit type | Site Testing |            |          |            | HPTN LC Testing |                      |                      |            |              |
|-------------------|----------------------|--------------|------------|----------|------------|-----------------|----------------------|----------------------|------------|--------------|
|                   |                      | Rapid 1 test | Ag/Ab test | RNA test | Viral load | Ag/Ab test      | Qualitative RNA test | Confirmatory Ab test | Viral load | Resistance   |
| Enrollment        |                      | NR           | NR         |          |            | NR              | NR                   |                      |            |              |
| Week 2            |                      | NR           | NR         |          |            |                 | NR                   |                      |            |              |
| Week 4            |                      | NR           | NR         |          |            |                 | NR                   |                      |            |              |
| Week 5*           |                      | NR           | NR         |          |            |                 | NR                   |                      |            |              |
| Week 6            |                      | NR           | NR         |          |            |                 | NR                   |                      |            |              |
| Week 9*           |                      | NR           | NR         |          |            | NR              | NR                   |                      |            |              |
| Week 10           |                      | NR           | NR         |          |            | NR              | NR                   |                      |            |              |
| Week 17*          |                      | NR           | NR         |          |            | NR              | NR                   |                      |            |              |
| 45 days [ Week 19 | 1st HIV pos          | NR           | NR         |          |            | NR              | R                    |                      | <40        |              |
| Week 25*          | 1st SITE pos         | NR           | R          | R        | 174        | R               | R                    | INDET                | 158        |              |
| Interim           |                      | NR           | R          | NR       | 298        | R               | R                    | INDET                | 263        |              |
| F/U Week 12**     |                      |              |            |          |            | R               | R                    | POS                  | 152,730    | G140A, Q148R |
| F/U Week 24       |                      |              |            |          | 40         | R               | R                    | POS                  | <40        |              |
| F/U Week 36       |                      |              |            |          |            | R               | R                    | POS                  | <40        |              |
| F/U Week 48       |                      |              |            |          | ND         |                 |                      |                      |            |              |

\*\*Started ART with TDF/FTC/EFV

HIV subtype C

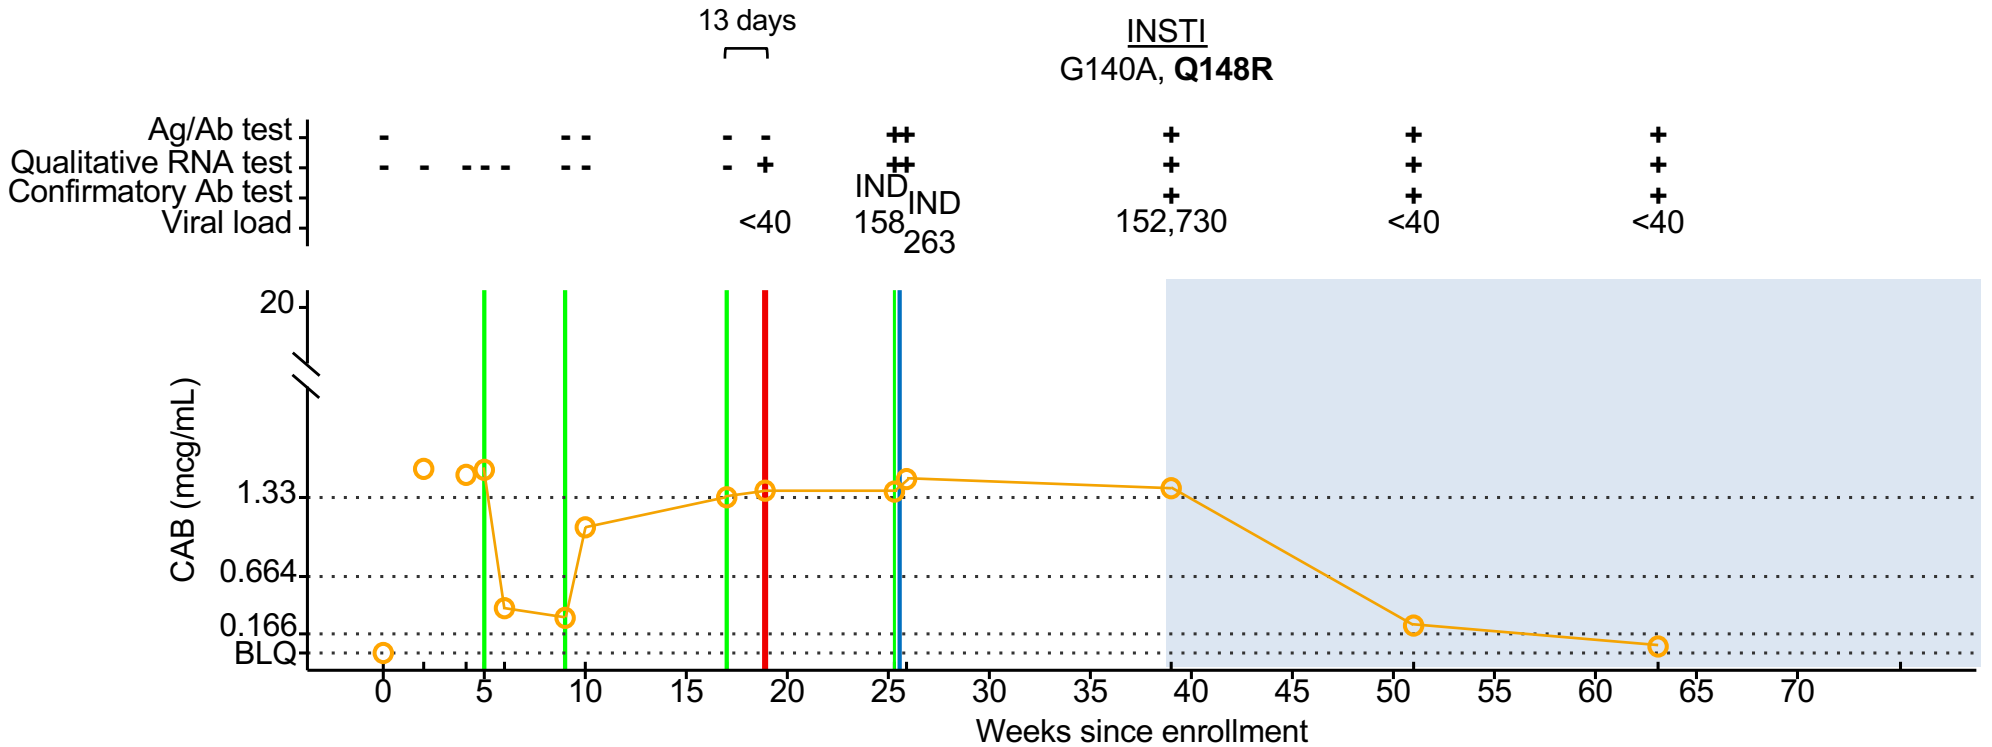

### **Supplementary File 6. Case Summaries, TDF/FTC arm (group E)**

This file shows a summary of laboratory results and key events for participants in the tenofovir disoproxil fumarate/emtricitabine (TDF/FTC) study arm at visits near the time of HIV infection. Each panel shows the results for one participant. Additional information for case E16 is provided in Figure 3.

Annotations above each graph show results obtained from testing performed at the HPTN Laboratory Center. A plus sign (+) indicates a reactive or positive test result. A minus sign (-) indicates a non-reactive or negative test result. IND indicates an indeterminate test result. Viral load values indicate the number of HIV RNA copies/mL. Major drug resistance mutations are shown. Graphs show tenofovir (TFV) and tenofovir diphosphate (TFV-DP) concentrations and key events as a function of time (weeks since enrollment, based on calendar dates). A red vertical line indicates the first HIV positive visit; a blue vertical line indicates the first site positive visit; a red/blue dashed line indicates that the first HIV positive visit and first site positive visit occurred on the same date. Light blue filled circles indicate TFV plasma concentrations. Dark blue open circles indicate TFV-DP concentrations in dried blood spots. Black dashed horizontal lines indicate TFV concentrations of 10 and 40 ng/mL; these concentrations correspond to 4 and 7 doses/week, respectively. Gray dashed lines indicate TFV-DP concentrations of 350, 700, and 1,250 fmol/punch; these concentrations correspond to 2, 4, and 7 doses/week, respectively. BLQ indicates that the drug concentration was below the limit of quantification (TFV: 0.31 ng/mL; TFV-DP: 31.3 fmol/punch).

Abbreviations: Ag/Ab: antigen/antibody; ND: not detected; ng: nanograms; mL: milliliter; fmol: femtomole; BLQ: below the limit of quantification; WT: wild type (no major resistance mutations detected).



# Case E1

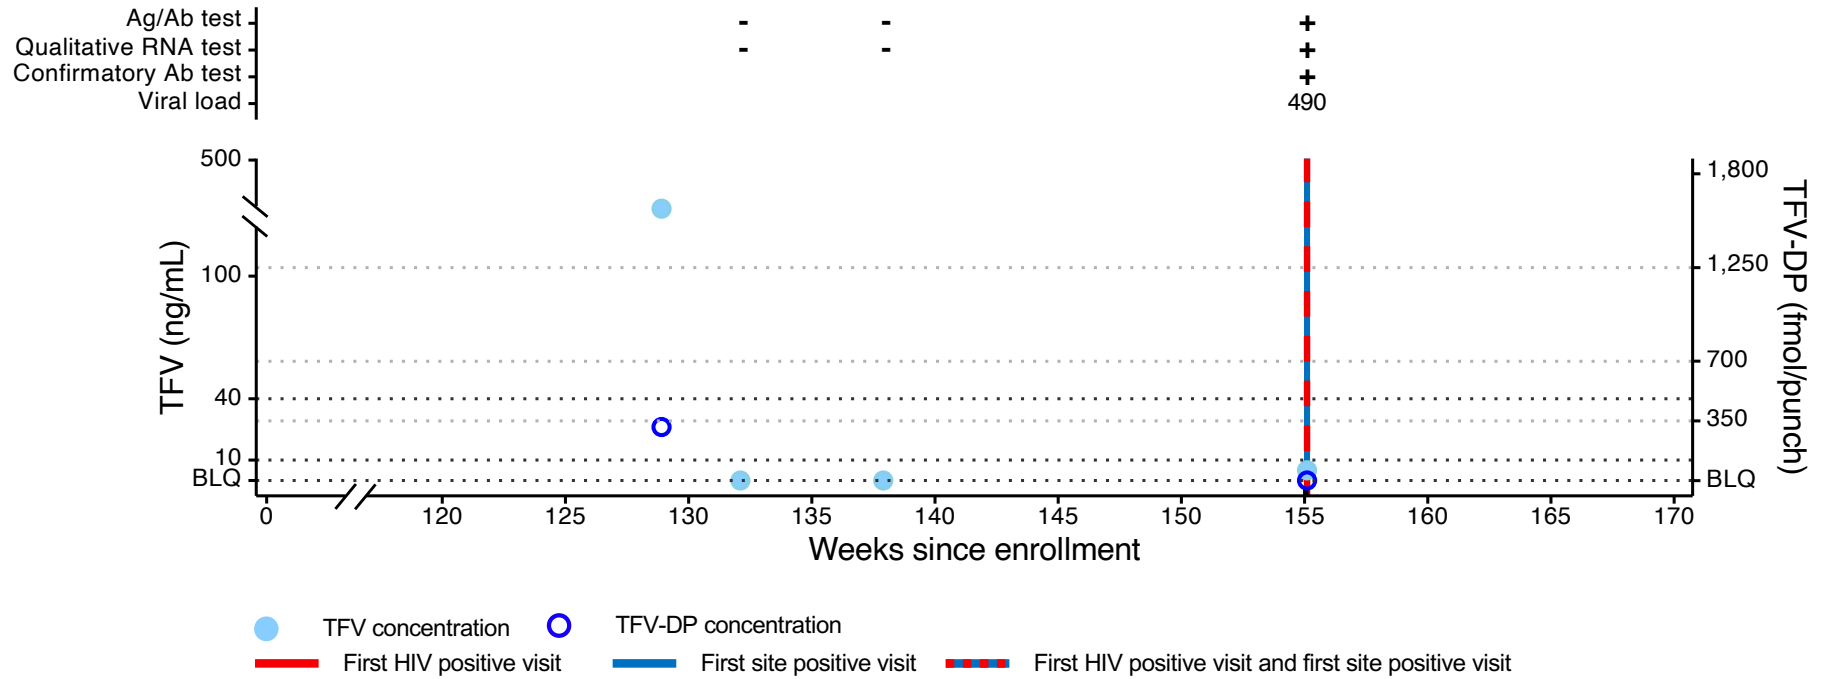

# Case E2

WT

Ag/Ab test  
Qualitative RNA test  
Confirmatory Ab test  
Viral load

-      +  
-      +  
+      +  
34,180

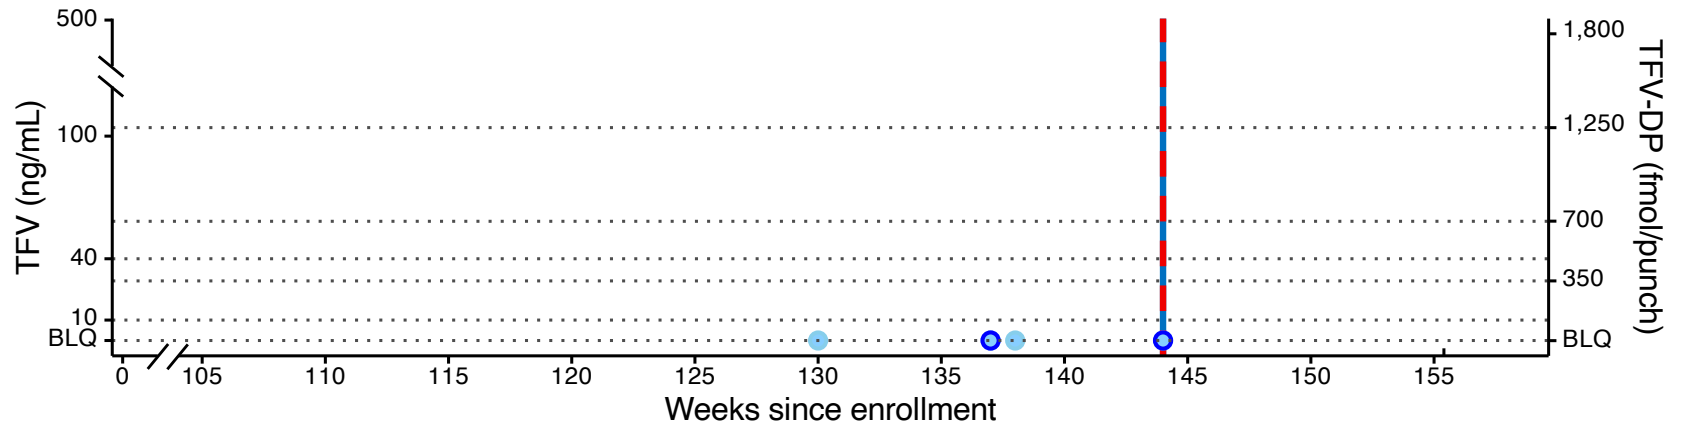

● TFV concentration      ○ TFV-DP concentration  
— First HIV positive visit      — First site positive visit      — First HIV positive visit and first site positive visit

# Case E3

M184I

Ag/Ab test  
 Qualitative RNA test  
 Confirmatory Ab test  
 Viral load

|   |         |
|---|---------|
| - | +       |
| - | +       |
|   | +       |
|   | 211,570 |

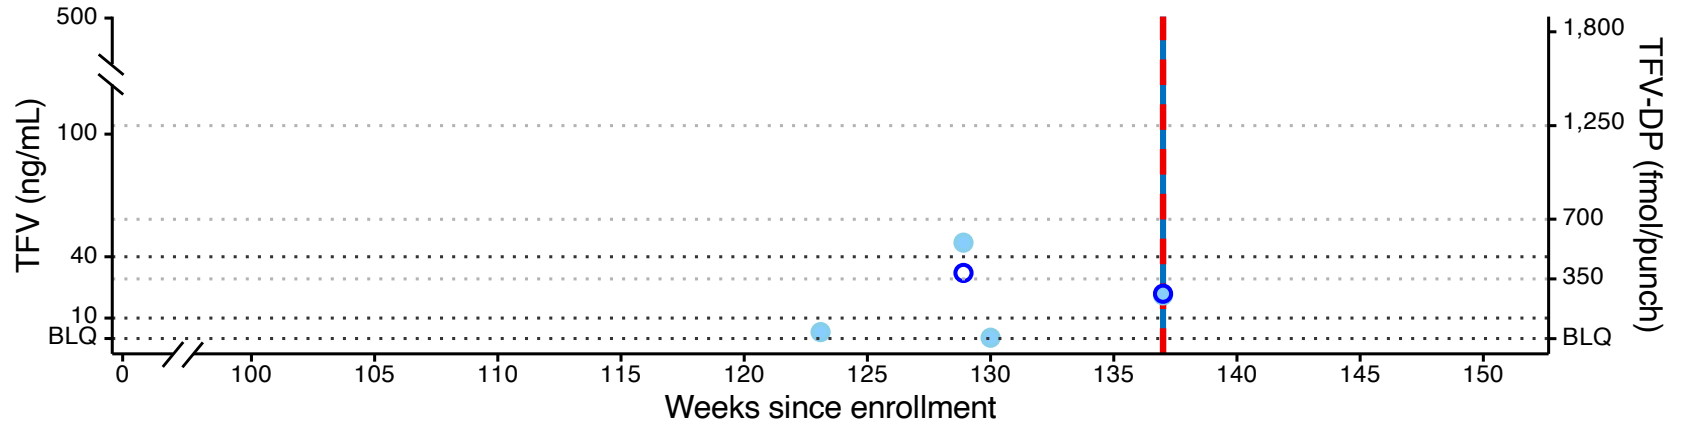

● TFV concentration    ○ TFV-DP concentration  
— First HIV positive visit    — First site positive visit    — — First HIV positive visit and first site positive visit

# Case E4

WT

Ag/Ab test  
Qualitative RNA test  
Confirmatory Ab test  
Viral load

|            |   |
|------------|---|
| -          | + |
| -          | + |
| -          | + |
| 53,021,030 |   |

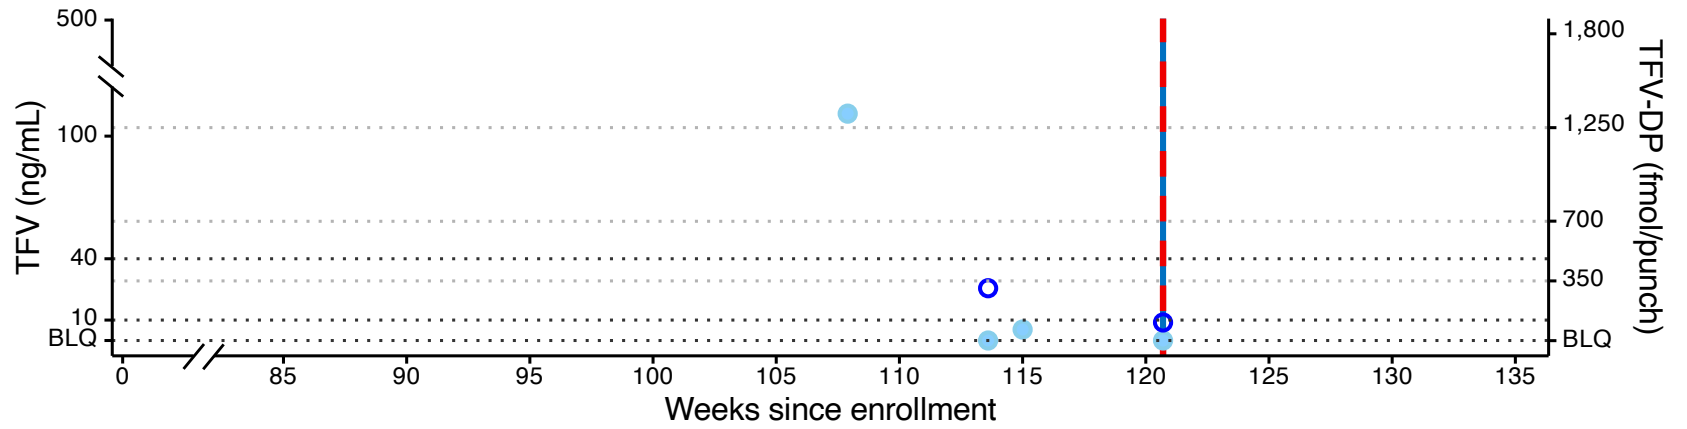

● TFV concentration    ○ TFV-DP concentration  
— First HIV positive visit    — First site positive visit    — First HIV positive visit and first site positive visit

# Case E5

WT

Ag/Ab test  
Qualitative RNA test  
Confirmatory Ab test  
Viral load

1,680

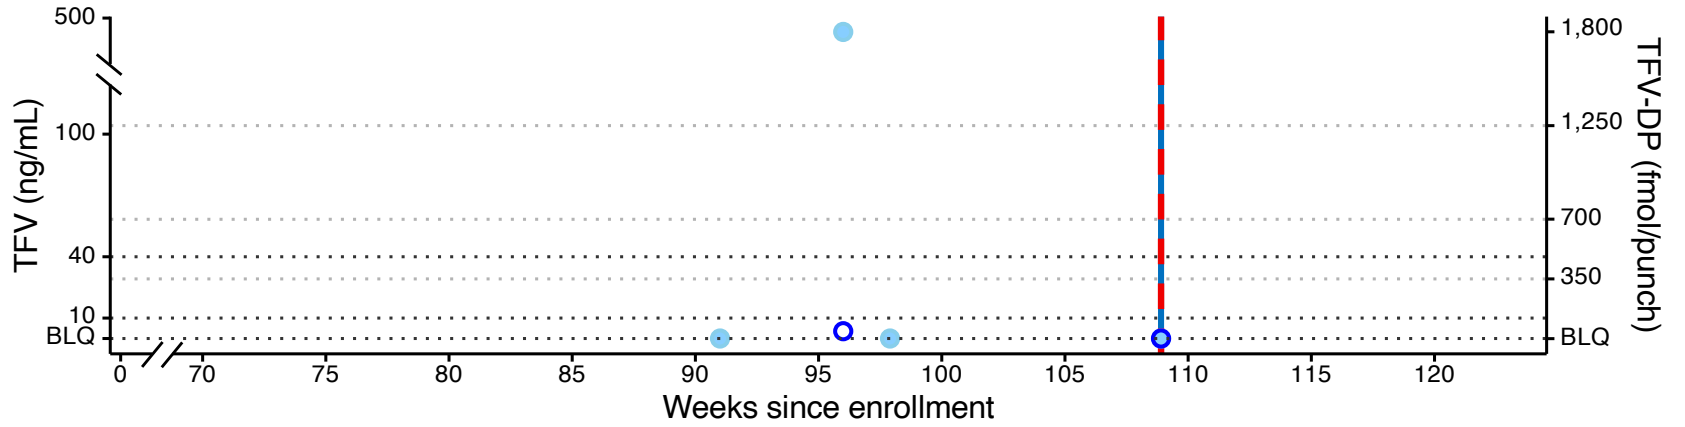

● TFV concentration    ○ TFV-DP concentration  
— First HIV positive visit    — First site positive visit    — First HIV positive visit and first site positive visit

# Case E6

K103N

Ag/Ab test  
Qualitative RNA test  
Confirmatory Ab test  
Viral load

- +  
- +  
- -  
476,020

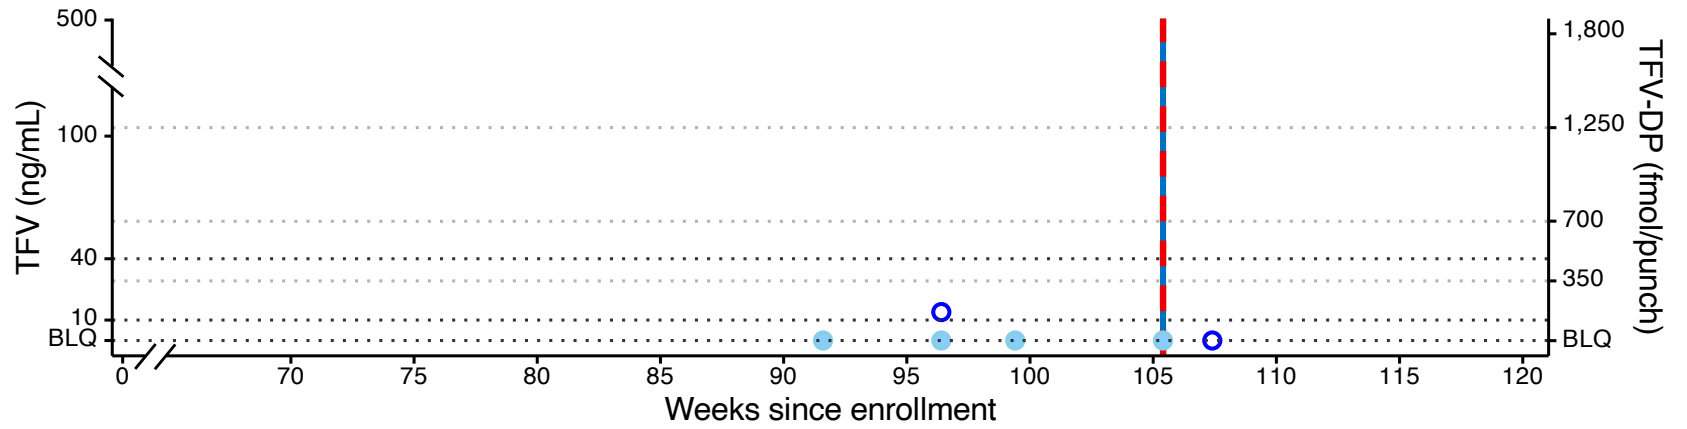

● TFV concentration    ○ TFV-DP concentration  
— First HIV positive visit    — First site positive visit    — First HIV positive visit and first site positive visit

# Case E7

K103N

Ag/Ab test  
Qualitative RNA test  
Confirmatory Ab test  
Viral load

- +  
- +  
- -  
1,023,293

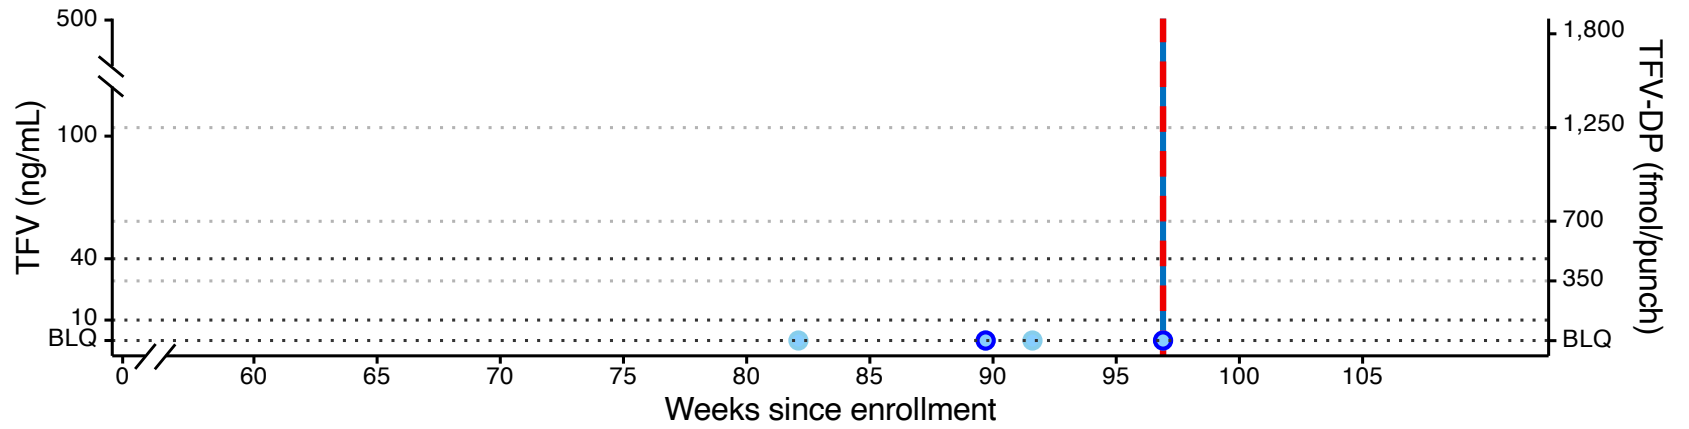

● TFV concentration    ○ TFV-DP concentration  
— First HIV positive visit    — First site positive visit    — First HIV positive visit and first site positive visit

# Case E8

WT

Ag/Ab test  
 Qualitative RNA test  
 Confirmatory Ab test  
 Viral load

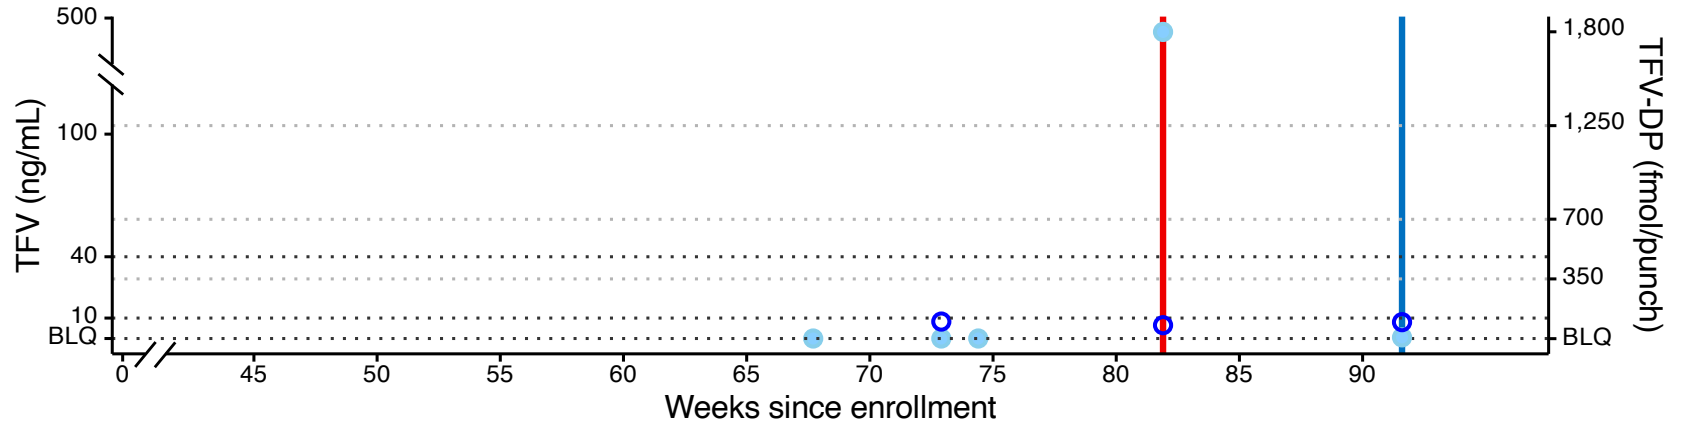

- TFV concentration    ○ TFV-DP concentration
- First HIV positive visit    — First site positive visit    — First HIV positive visit and first site positive visit

|                      |   |                 |    |
|----------------------|---|-----------------|----|
| Ag/Ab test           | - | -               | +  |
| Qualitative RNA test | - | +               | +  |
| Confirmatory Ab test |   |                 | +  |
| Viral load           |   | 20,350<br>7,630 | ND |



# Case E9

WT

Ag/Ab test  
Qualitative RNA test  
Confirmatory Ab test  
Viral load

- +  
- +  
-  
505,690

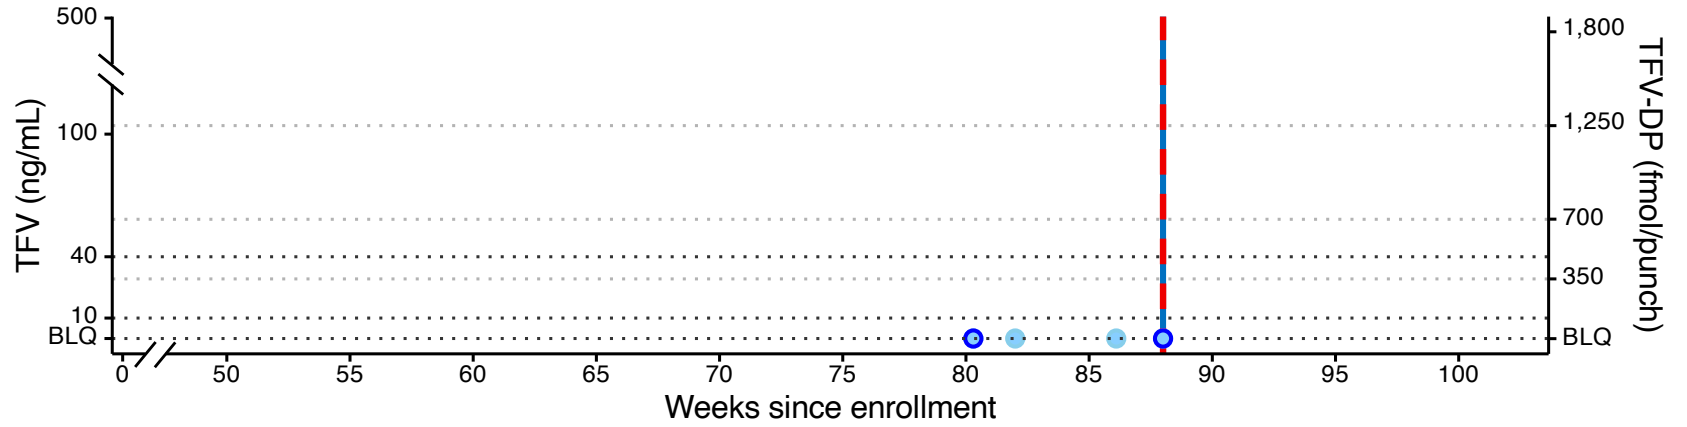

● TFV concentration    ○ TFV-DP concentration  
— First HIV positive visit    — First site positive visit    — First HIV positive visit and first site positive visit

# Case E10

WT

Ag/Ab test  
 Qualitative RNA test  
 Confirmatory Ab test  
 Viral load

-        +  
 -        +  
 +        +  
 906,900

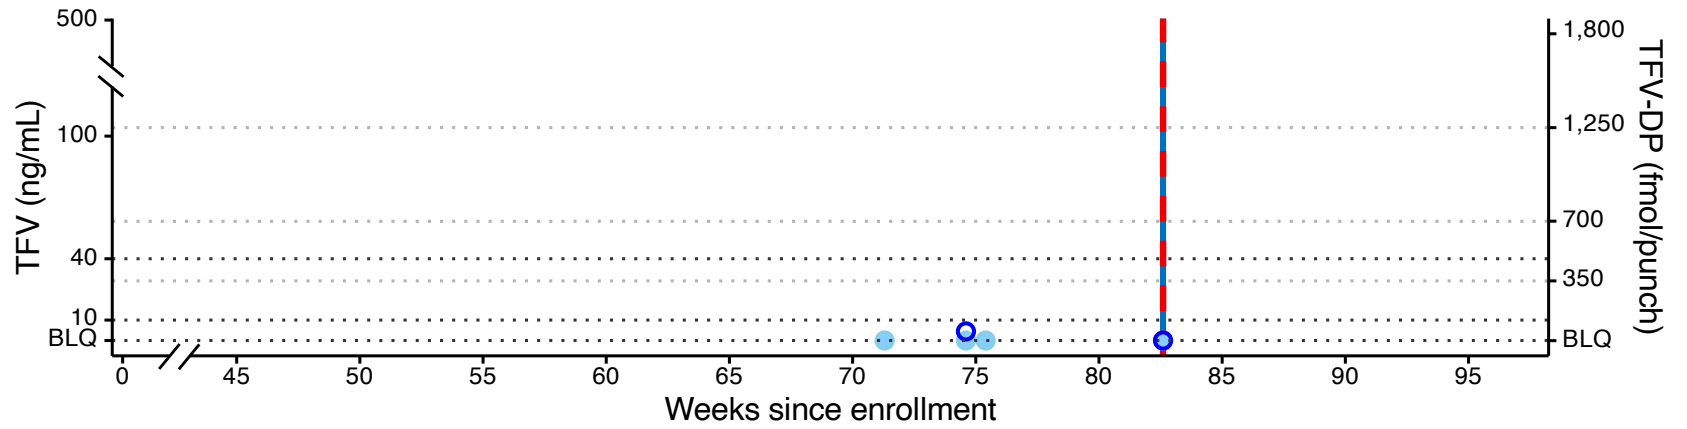

● TFV concentration    ○ TFV-DP concentration  
 — First HIV positive visit    — First site positive visit    — First HIV positive visit and first site positive visit

# Case E11

K103N

Ag/Ab test  
 Qualitative RNA test  
 Confirmatory Ab test  
 Viral load

|   |         |
|---|---------|
| - | +       |
| - | +       |
|   | +       |
|   | 154,470 |

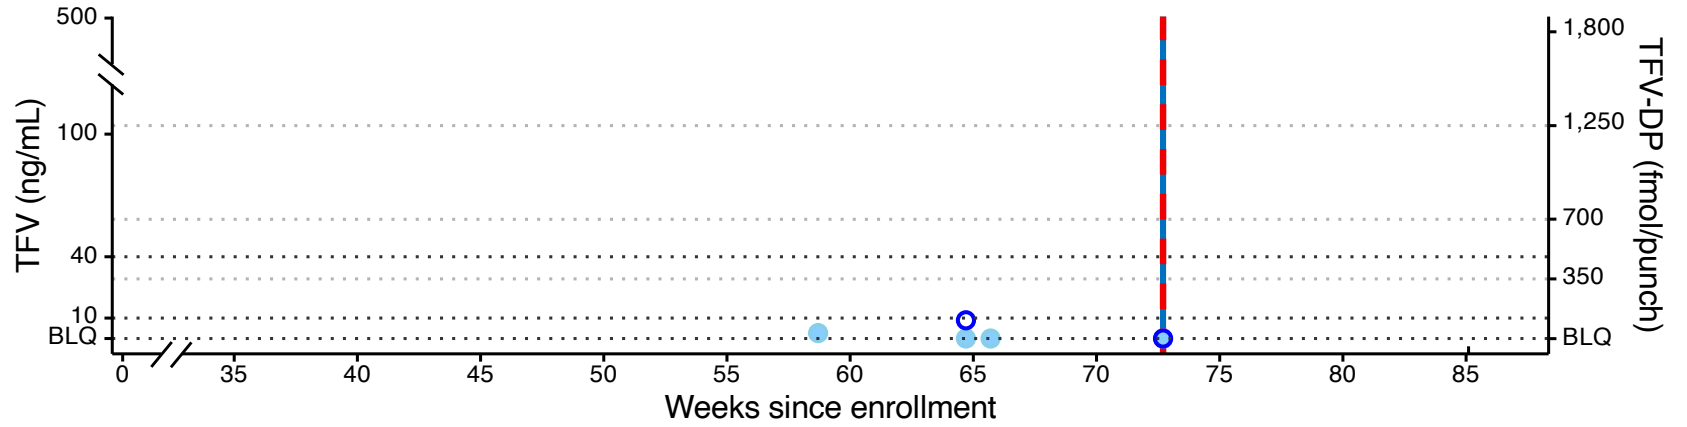

● TFV concentration    ○ TFV-DP concentration  
 — First HIV positive visit    — First site positive visit    — First HIV positive visit and first site positive visit

# Case E12

WT

Ag/Ab test  
Qualitative RNA test  
Confirmatory Ab test  
Viral load

-  
-

+  
+  
+  
813,790

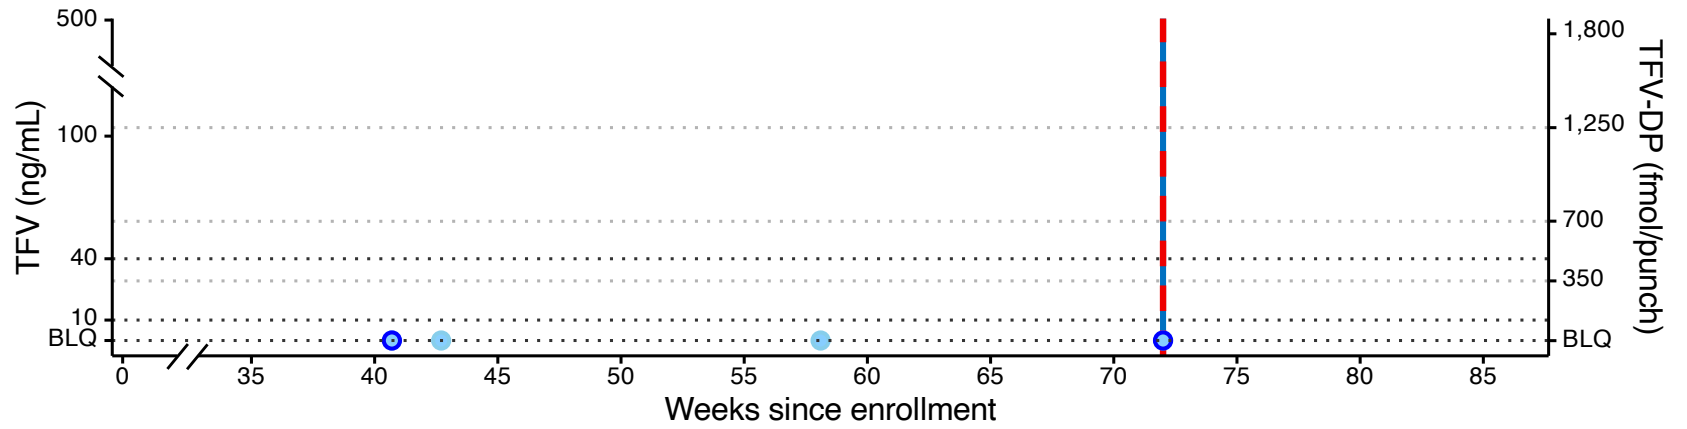

● TFV concentration    ○ TFV-DP concentration  
— First HIV positive visit    — First site positive visit    — First HIV positive visit and first site positive visit

# Case E13

M184V,  
K103N

Ag/Ab test  
Qualitative RNA test  
Confirmatory Ab test  
Viral load

-        +  
-        +  
          IND  
          9,120

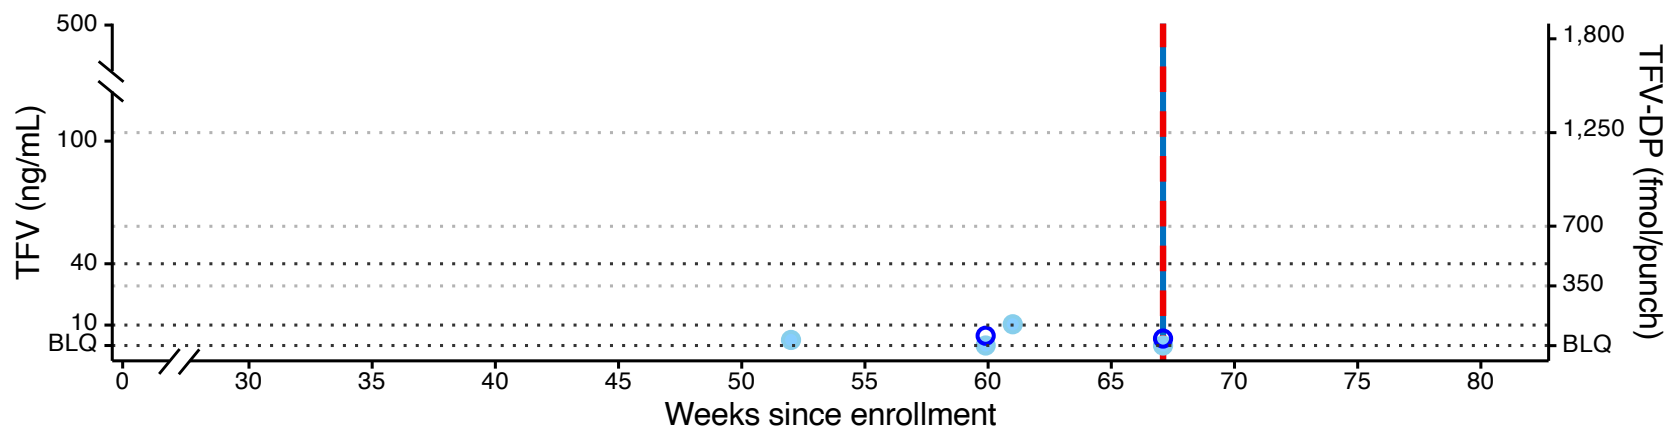

● TFV concentration    ○ TFV-DP concentration  
— First HIV positive visit    — First site positive visit    — First HIV positive visit and first site positive visit

# Case E14

K103N

Ag/Ab test  
Qualitative RNA test  
Confirmatory Ab test  
Viral load

-            +  
-            +  
              IND  
              143,510

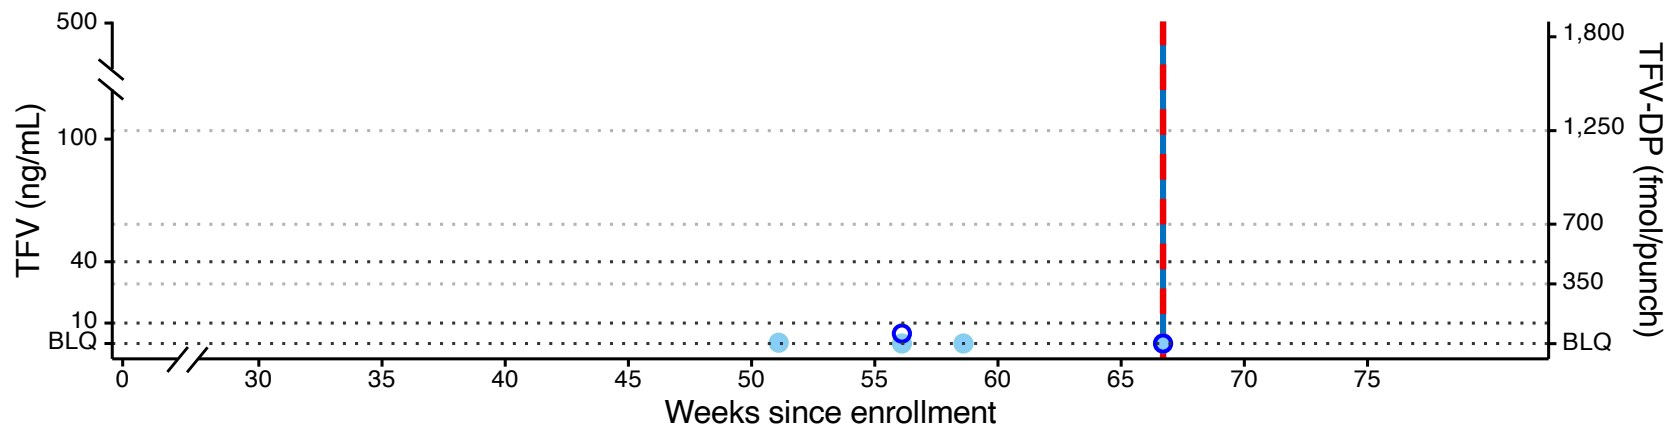

● TFV concentration    ○ TFV-DP concentration  
— First HIV positive visit    — First site positive visit    — First HIV positive visit and first site positive visit

# Case E15

G190S

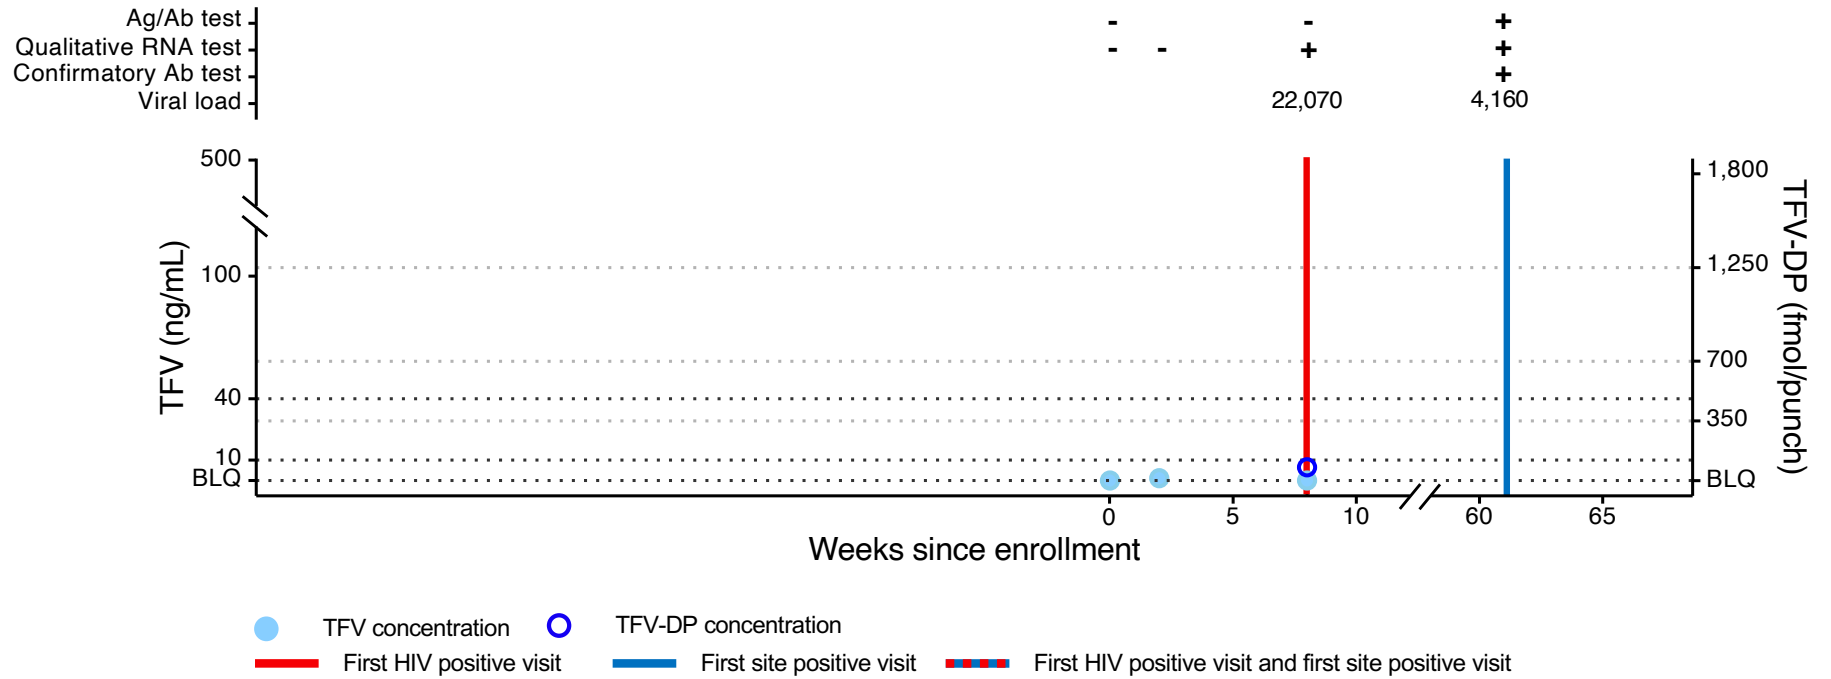

# Case E16

K65R, Y181C,  
G190A, H221Y

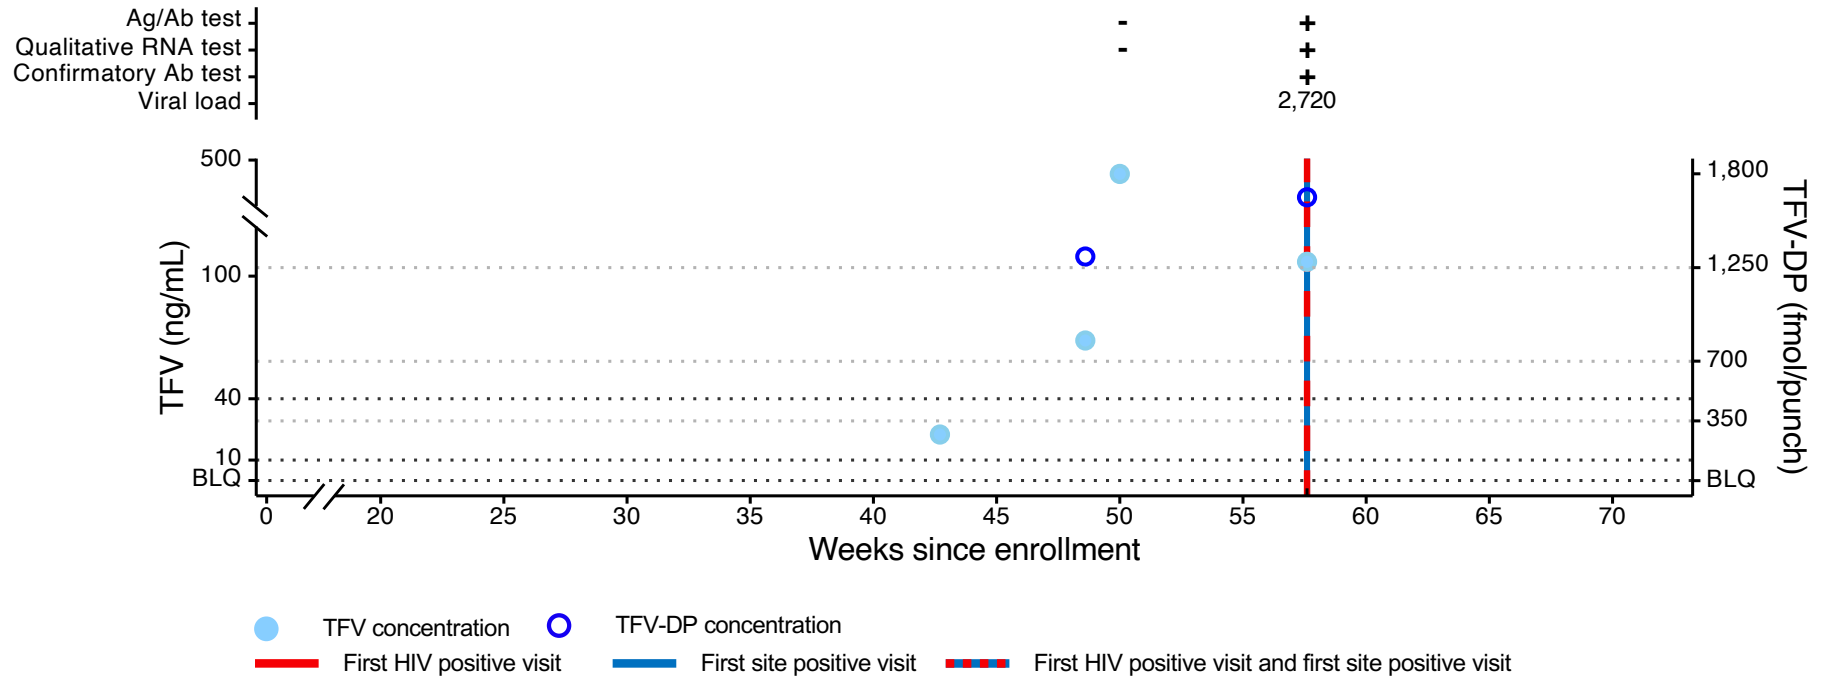



# Case E17

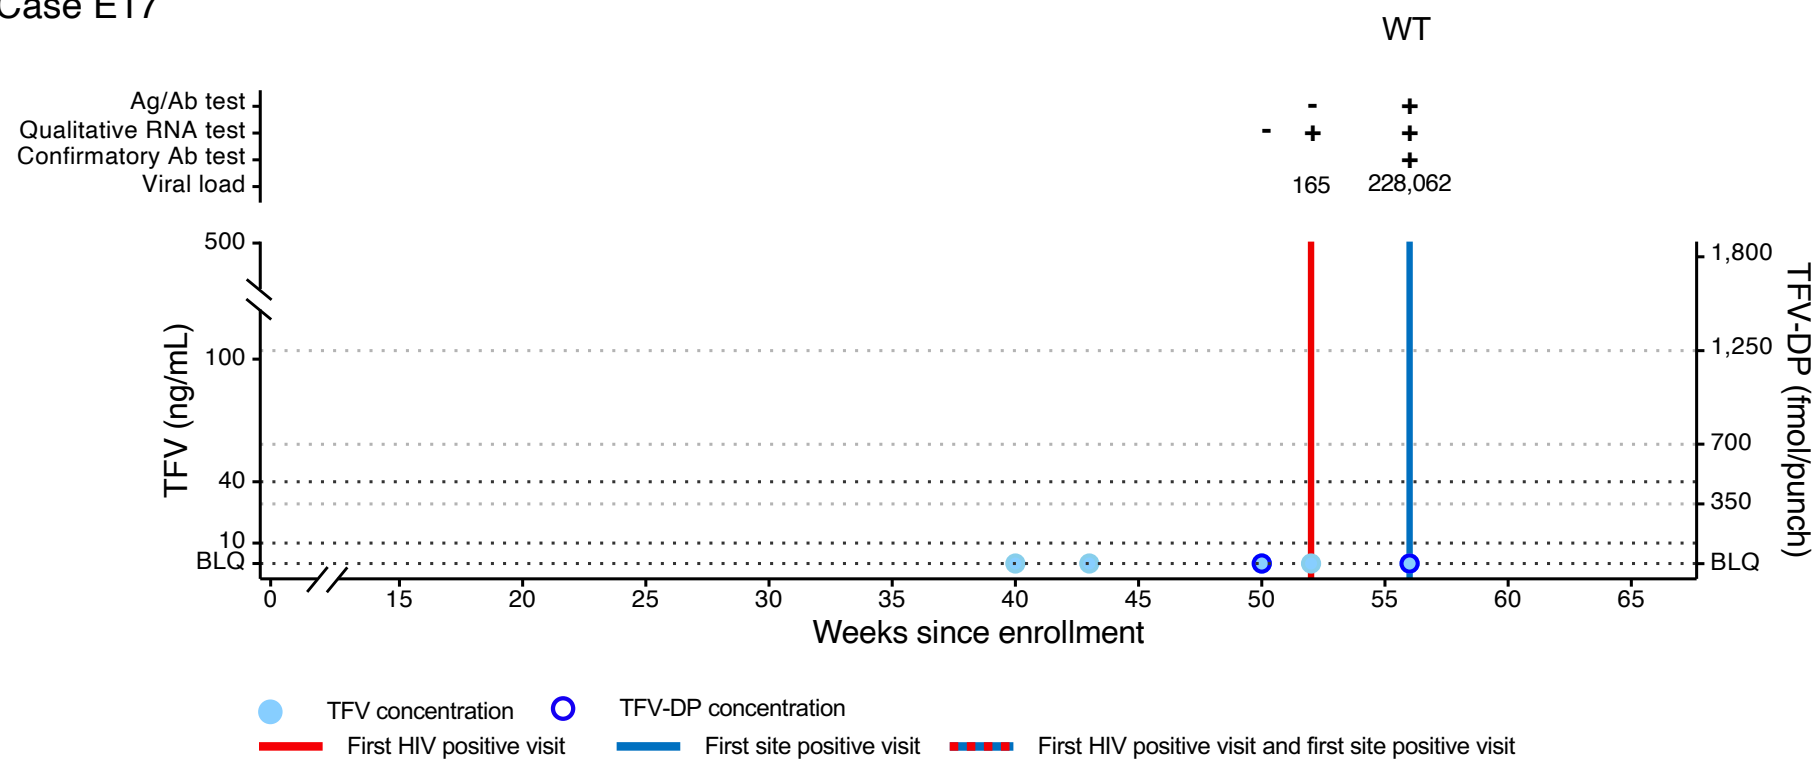

# Case E18

WT

Ag/Ab test  
Qualitative RNA test  
Confirmatory Ab test  
Viral load

-

-

+

+

+

52,900

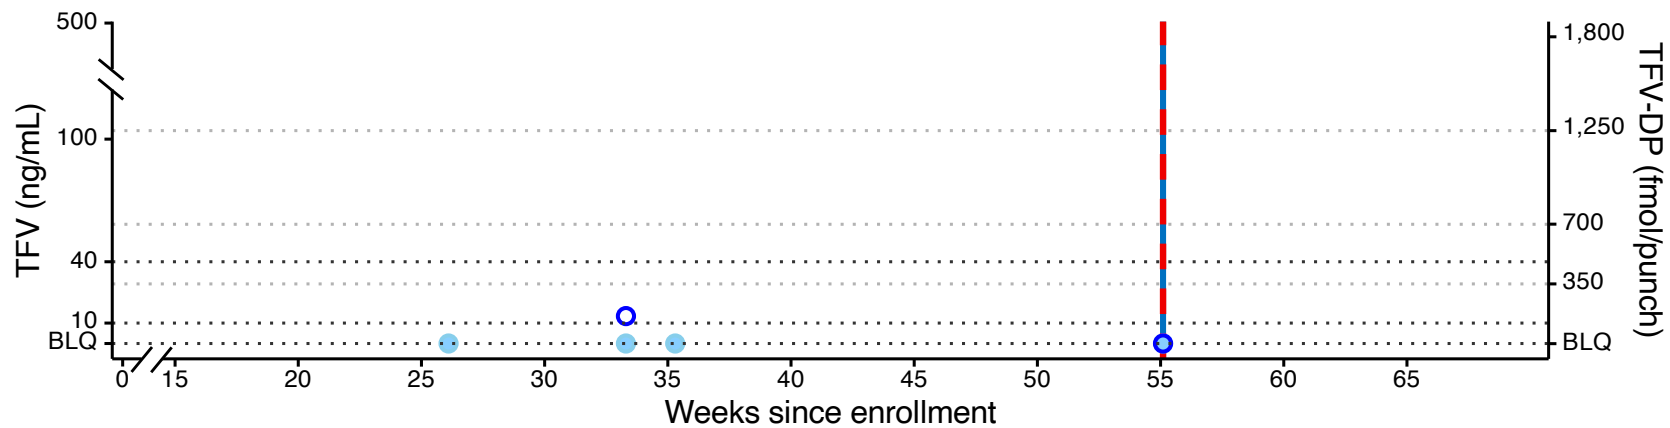

- TFV concentration
- TFV-DP concentration
- First HIV positive visit
- First site positive visit
- First HIV positive visit and first site positive visit

# Case E19

WT

Ag/Ab test  
Qualitative RNA test  
Confirmatory Ab test  
Viral load

- +  
- +  
+  
745,110

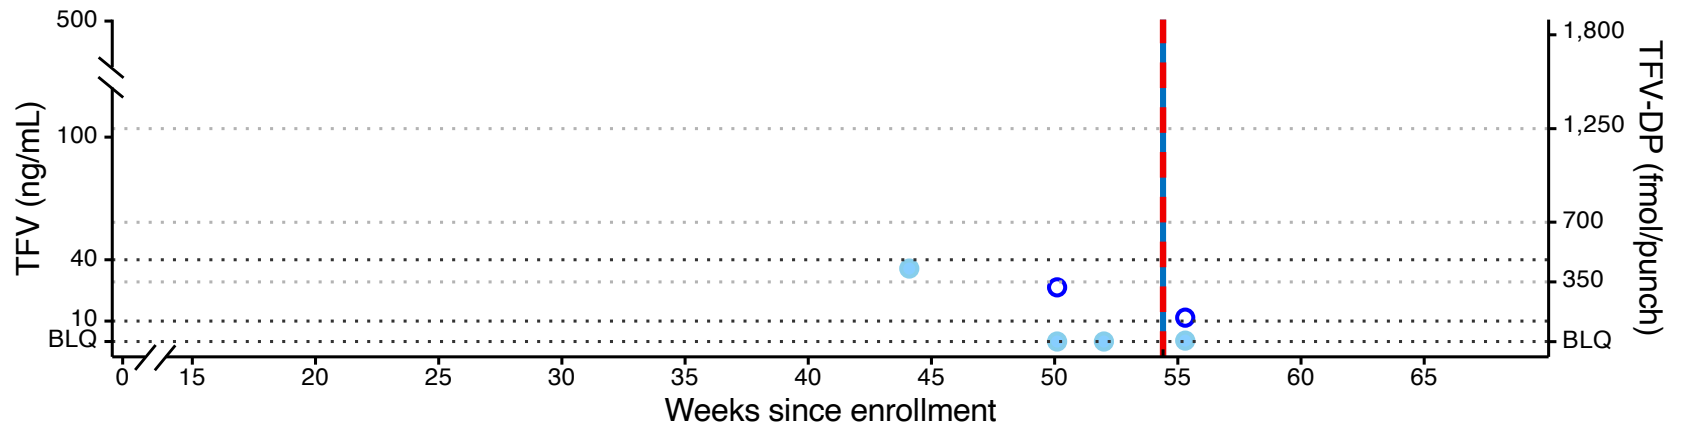

- TFV concentration
- TFV-DP concentration
- First HIV positive visit
- First site positive visit
- First HIV positive visit and first site positive visit

# Case E20

WT

Ag/Ab test  
Qualitative RNA test  
Confirmatory Ab test  
Viral load

-        +  
-        +  
          +  
543,020

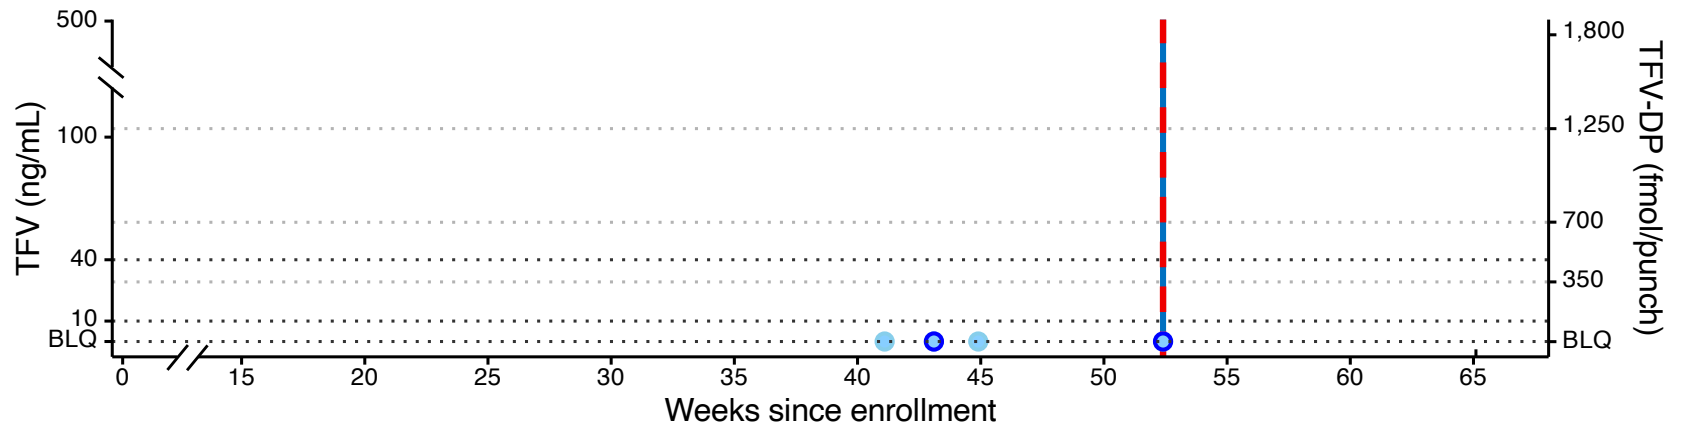

● TFV concentration    ○ TFV-DP concentration  
— First HIV positive visit    — First site positive visit    — First HIV positive visit and first site positive visit

# Case E21

WT

Ag/Ab test  
Qualitative RNA test  
Confirmatory Ab test  
Viral load

-                    +  
-                    +  
                      IND  
28,637,470

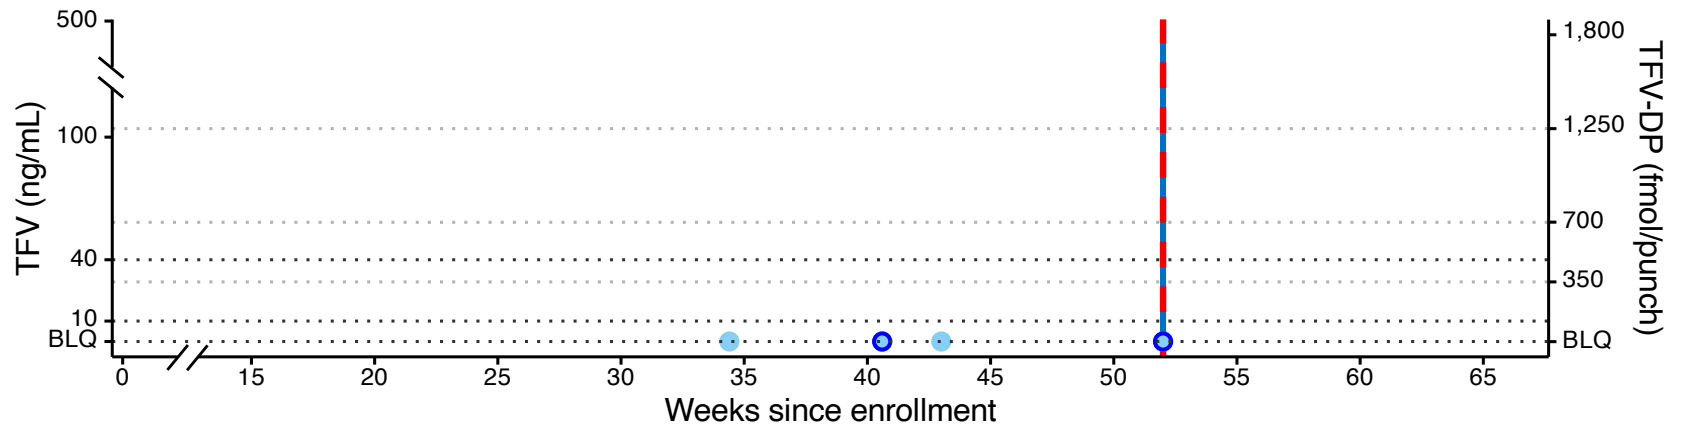

● TFV concentration    ○ TFV-DP concentration  
— First HIV positive visit    — First site positive visit    — First HIV positive visit and first site positive visit

# Case E22

WT

Ag/Ab test  
Qualitative RNA test  
Confirmatory Ab test  
Viral load

-        +  
-        +  
         +  
9,751,430

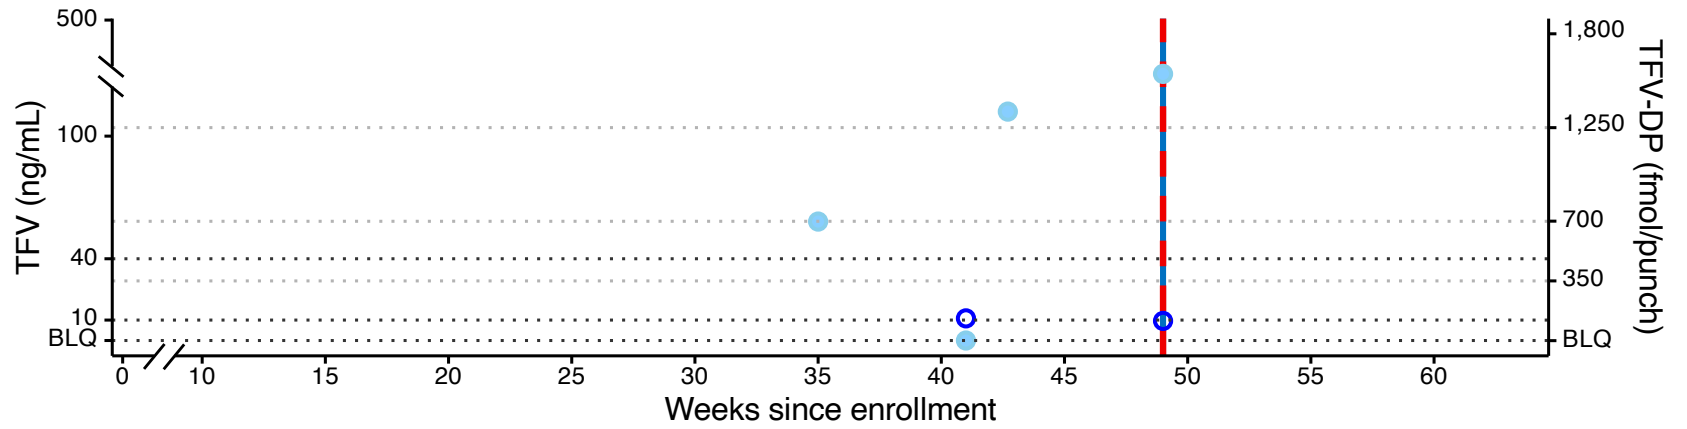

● TFV concentration    ○ TFV-DP concentration  
— First HIV positive visit    — First site positive visit    - - First HIV positive visit and first site positive visit

# Case E23

WT

Ag/Ab test  
Qualitative RNA test  
Confirmatory Ab test  
Viral load

-     +  
-     +  
+     +  
146,260

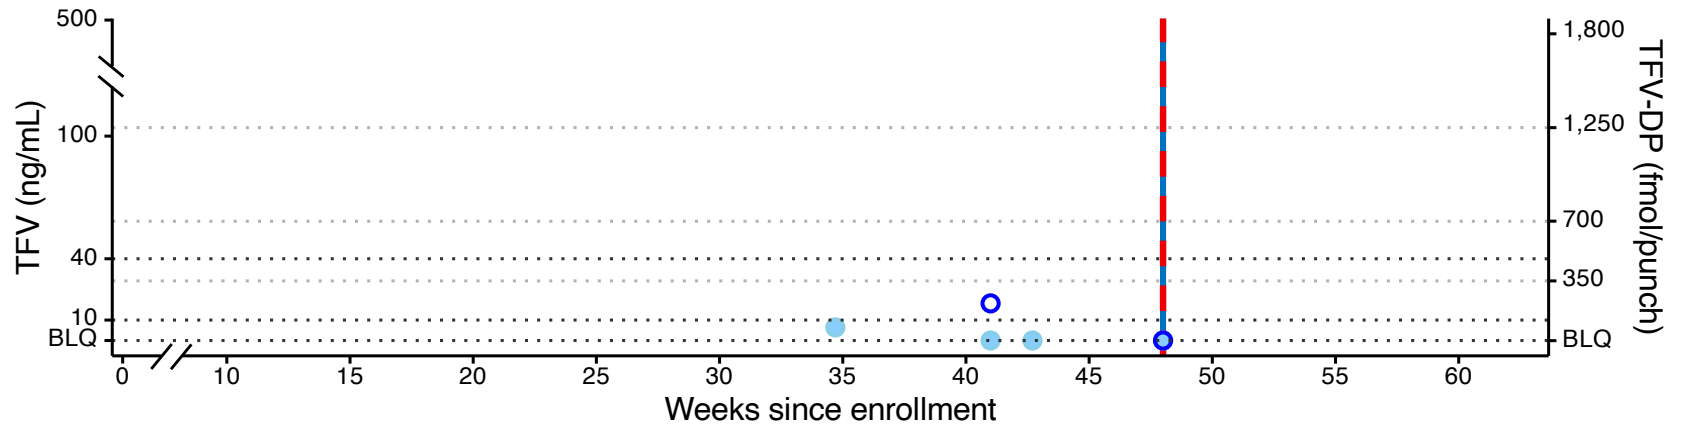

● TFV concentration   ○ TFV-DP concentration  
— First HIV positive visit   — First site positive visit   — First HIV positive visit and first site positive visit

# Case E24

WT

Ag/Ab test  
Qualitative RNA test  
Confirmatory Ab test  
Viral load

- +  
- +  
-  
2,112,430

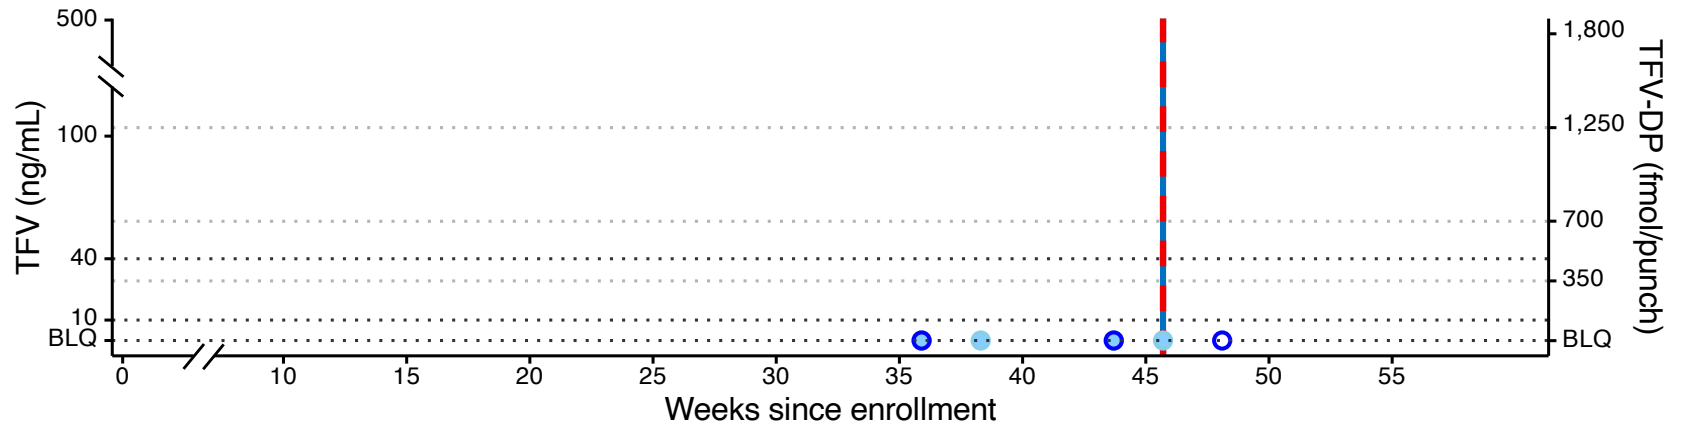

● TFV concentration    ○ TFV-DP concentration  
— First HIV positive visit    — First site positive visit    — First HIV positive visit and first site positive visit



# Case E25

M184V  
K103N, P225H

Ag/Ab test  
Qualitative RNA test  
Confirmatory Ab test  
Viral load

- +  
- +  
- -  
36,976,550

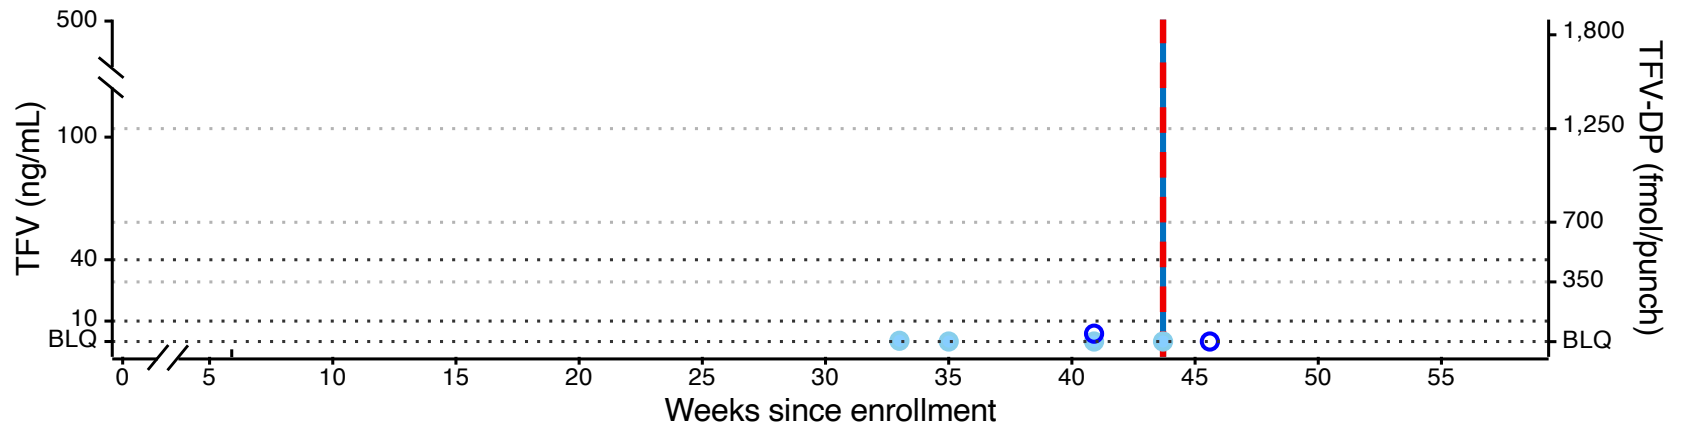

● TFV concentration    ○ TFV-DP concentration  
— First HIV positive visit    — First site positive visit    — First HIV positive visit and first site positive visit

# Case E26

WT

Ag/Ab test  
Qualitative RNA test  
Confirmatory Ab test  
Viral load

- +  
- +  
- -  
19,507,790

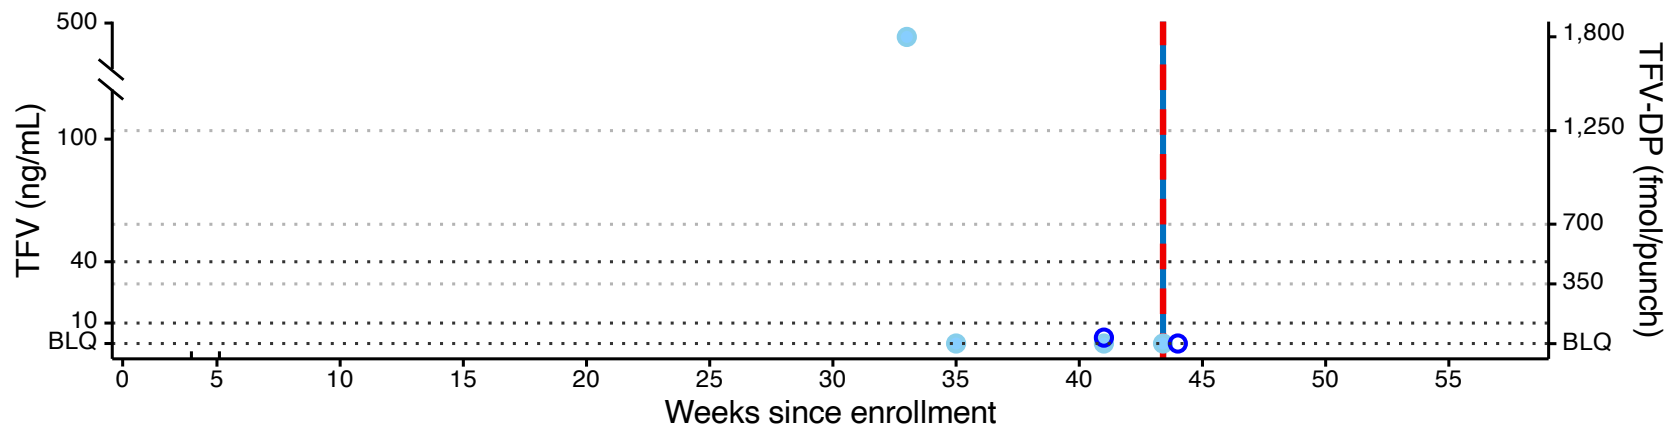

- TFV concentration
- TFV-DP concentration
- First HIV positive visit
- First site positive visit
- First HIV positive visit and first site positive visit

# Case E27

WT

Ag/Ab test  
 Qualitative RNA test  
 Confirmatory Ab test  
 Viral load

|   |        |        |
|---|--------|--------|
| - | - -    | +      |
| - | ++     | +      |
|   |        | +      |
|   | <40    | 19,260 |
|   | 26,910 |        |

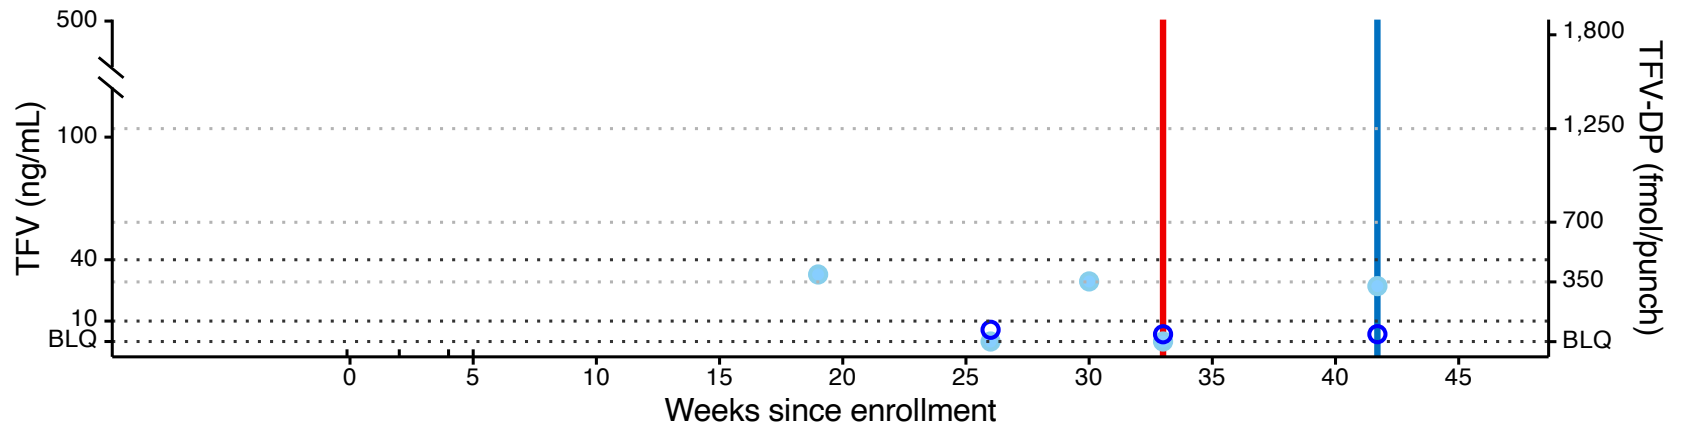

● TFV concentration    ○ TFV-DP concentration  
 — First HIV positive visit    — First site positive visit    — First HIV positive visit and first site positive visit

# Case E28

WT

Ag/Ab test  
Qualitative RNA test  
Confirmatory Ab test  
Viral load

- +  
- +  
+  
111,820

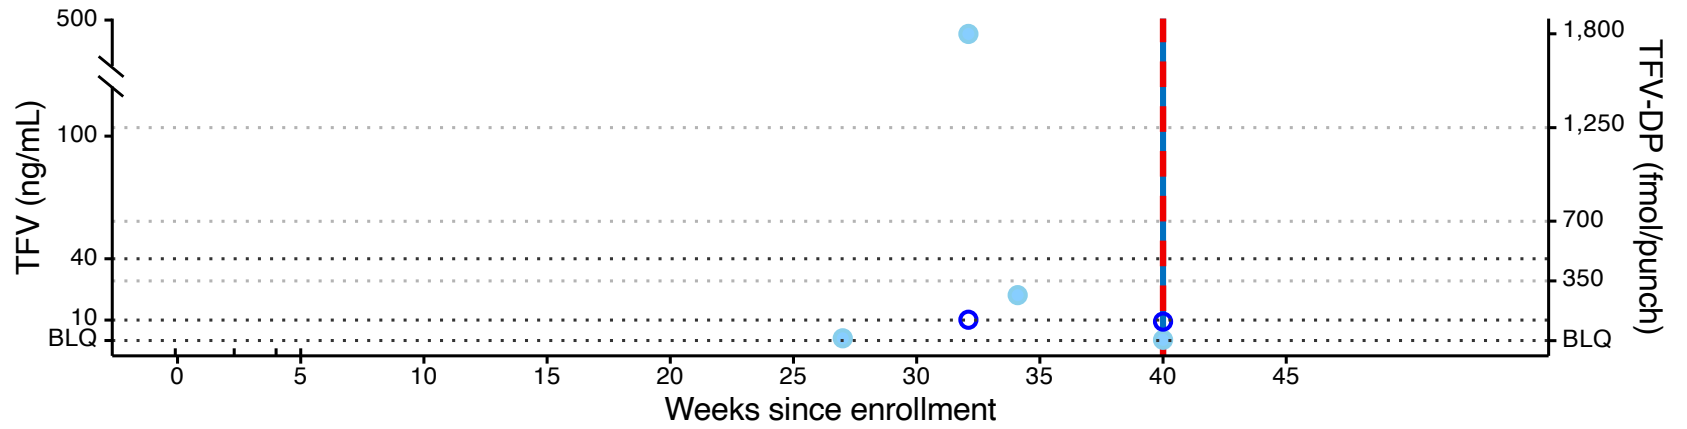

● TFV concentration    ○ TFV-DP concentration  
— First HIV positive visit    — First site positive visit    — First HIV positive visit and first site positive visit

# Case E29

WT

Ag/Ab test  
Qualitative RNA test  
Confirmatory Ab test  
Viral load

+

+

+

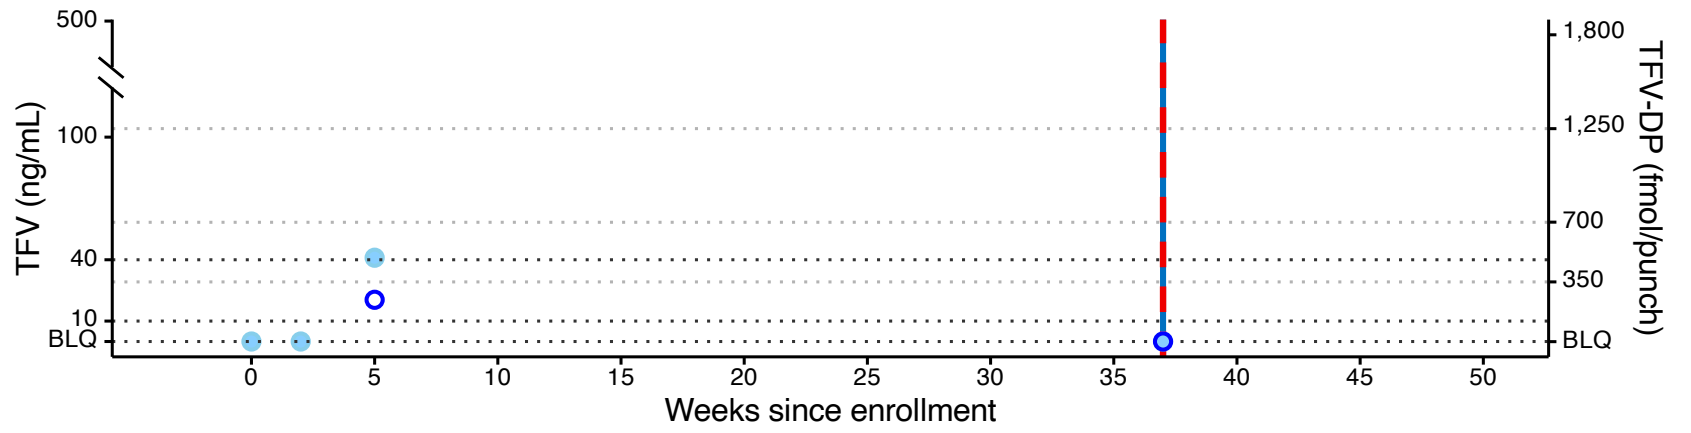

● TFV concentration    ○ TFV-DP concentration  
— First HIV positive visit    — First site positive visit    — First HIV positive visit and first site positive visit

# Case E30

WT

Ag/Ab test  
Qualitative RNA test  
Confirmatory Ab test  
Viral load

|   |        |         |
|---|--------|---------|
| - | -      | +       |
| - | +      | +       |
|   |        | +       |
|   | 13,230 | 375,210 |

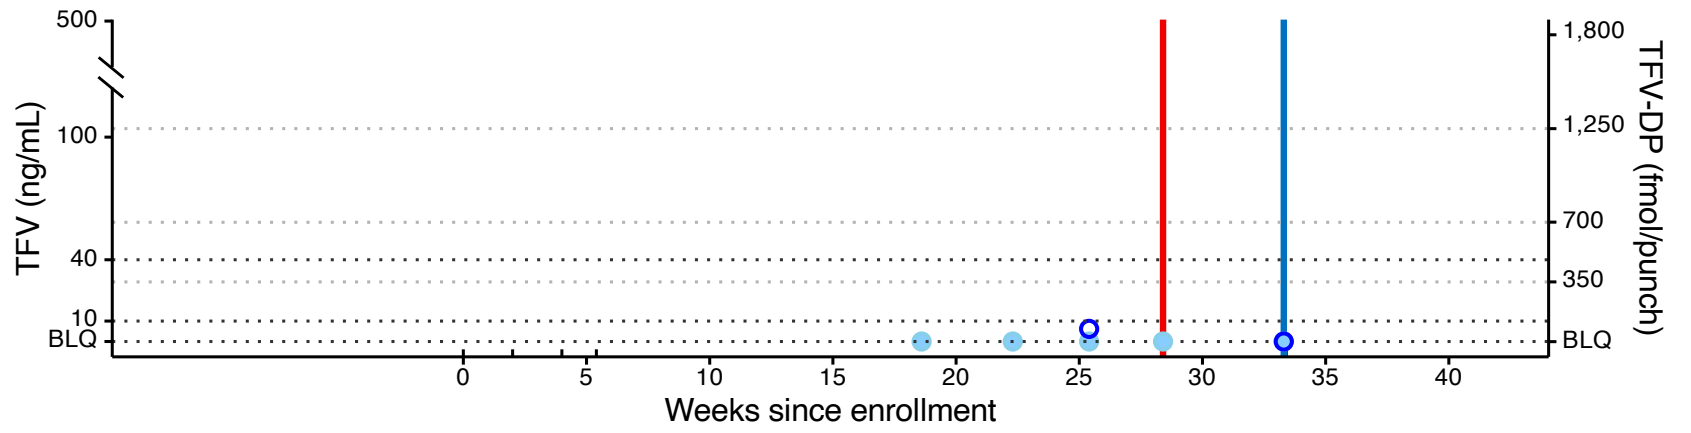

- TFV concentration
- TFV-DP concentration
- First HIV positive visit
- First site positive visit
- First HIV positive visit and first site positive visit

# Case E31

WT

Ag/Ab test  
Qualitative RNA test  
Confirmatory Ab test  
Viral load

7,820

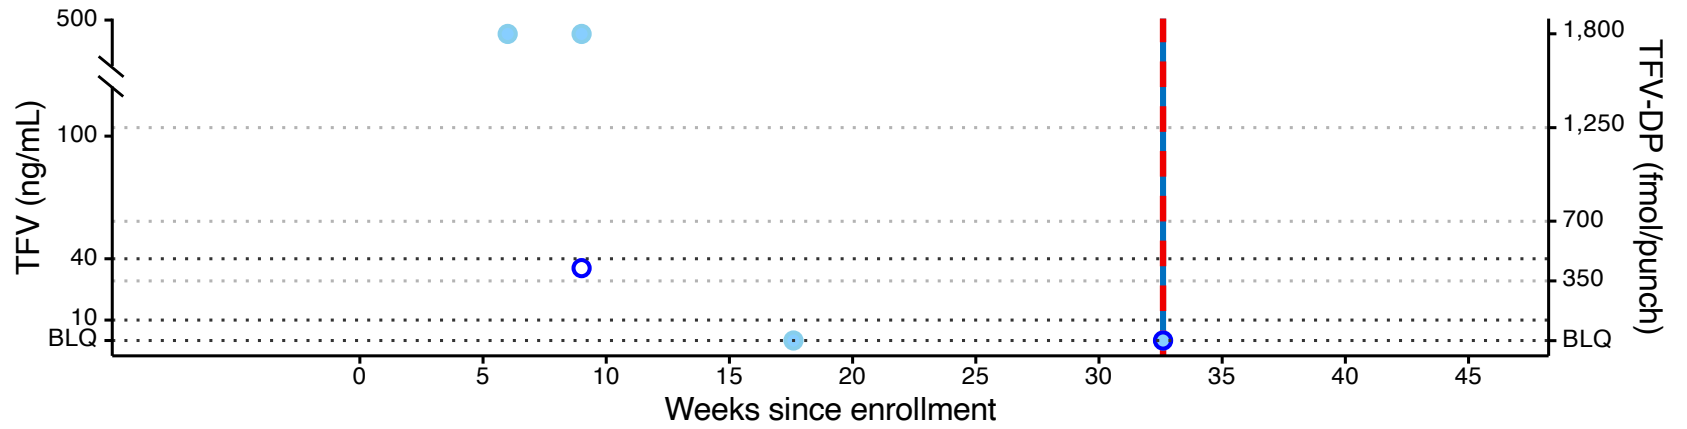

● TFV concentration    ○ TFV-DP concentration  
— First HIV positive visit    — First site positive visit    — First HIV positive visit and first site positive visit

# Case E32

K103N

Ag/Ab test  
Qualitative RNA test  
Confirmatory Ab test  
Viral load

- -  
+ +  
11,310

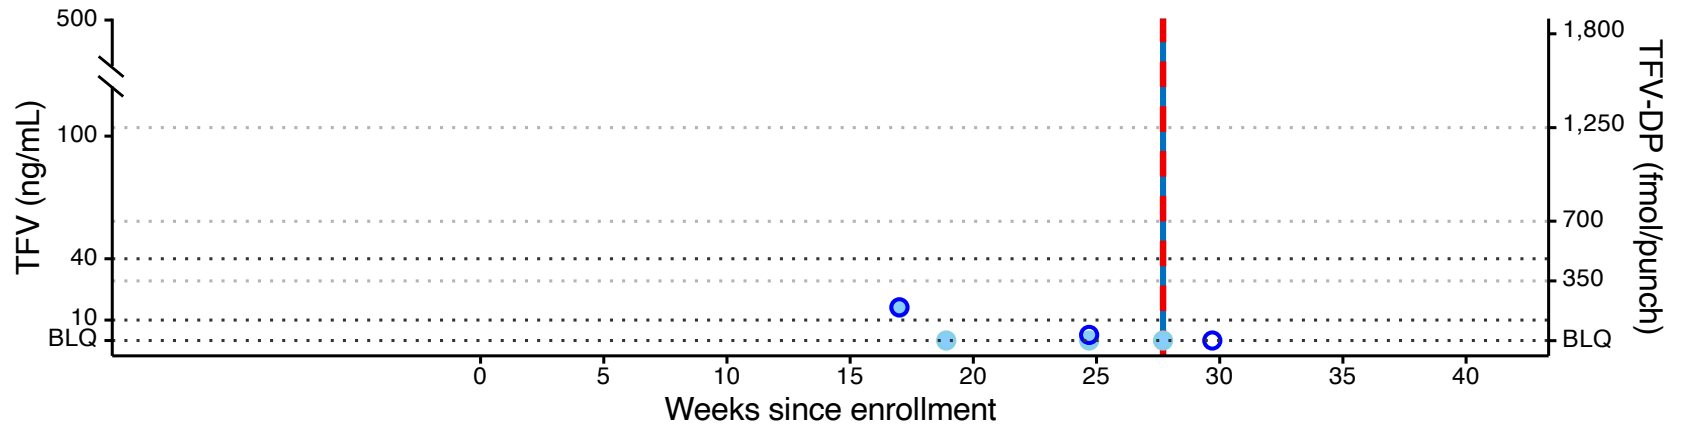

- TFV concentration
- TFV-DP concentration
- First HIV positive visit
- First site positive visit
- First HIV positive visit and first site positive visit



# Case E33

WT

Ag/Ab test  
Qualitative RNA test  
Confirmatory Ab test  
Viral load

- +  
- +  
+  
4,510

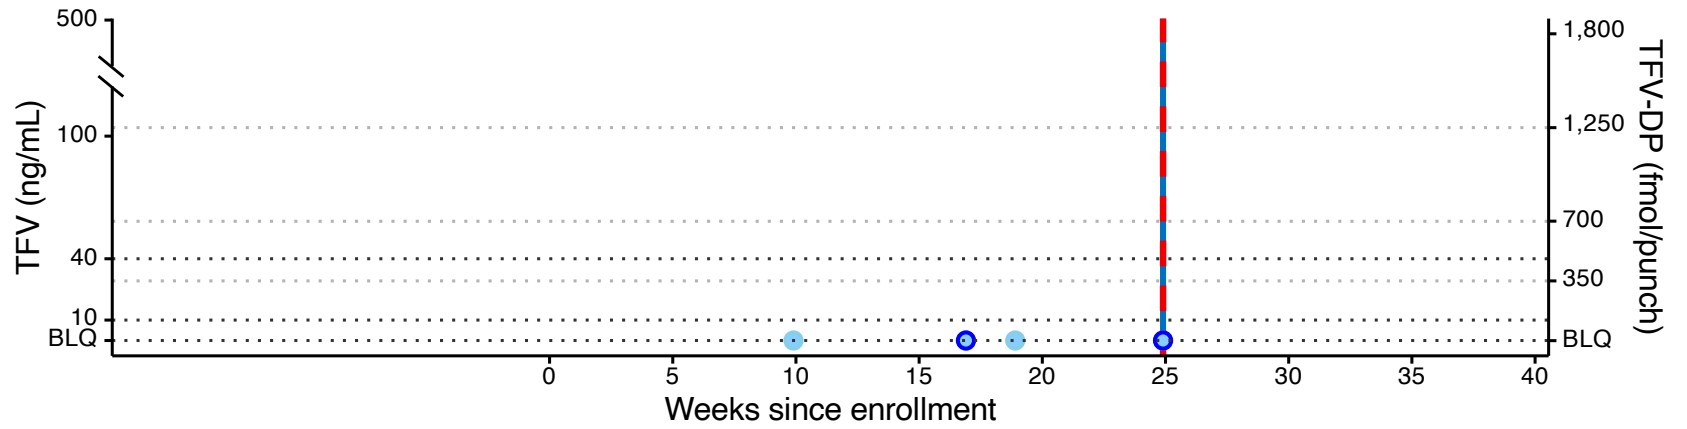

● TFV concentration    ○ TFV-DP concentration  
— First HIV positive visit    — First site positive visit    — First HIV positive visit and first site positive visit

# Case E34

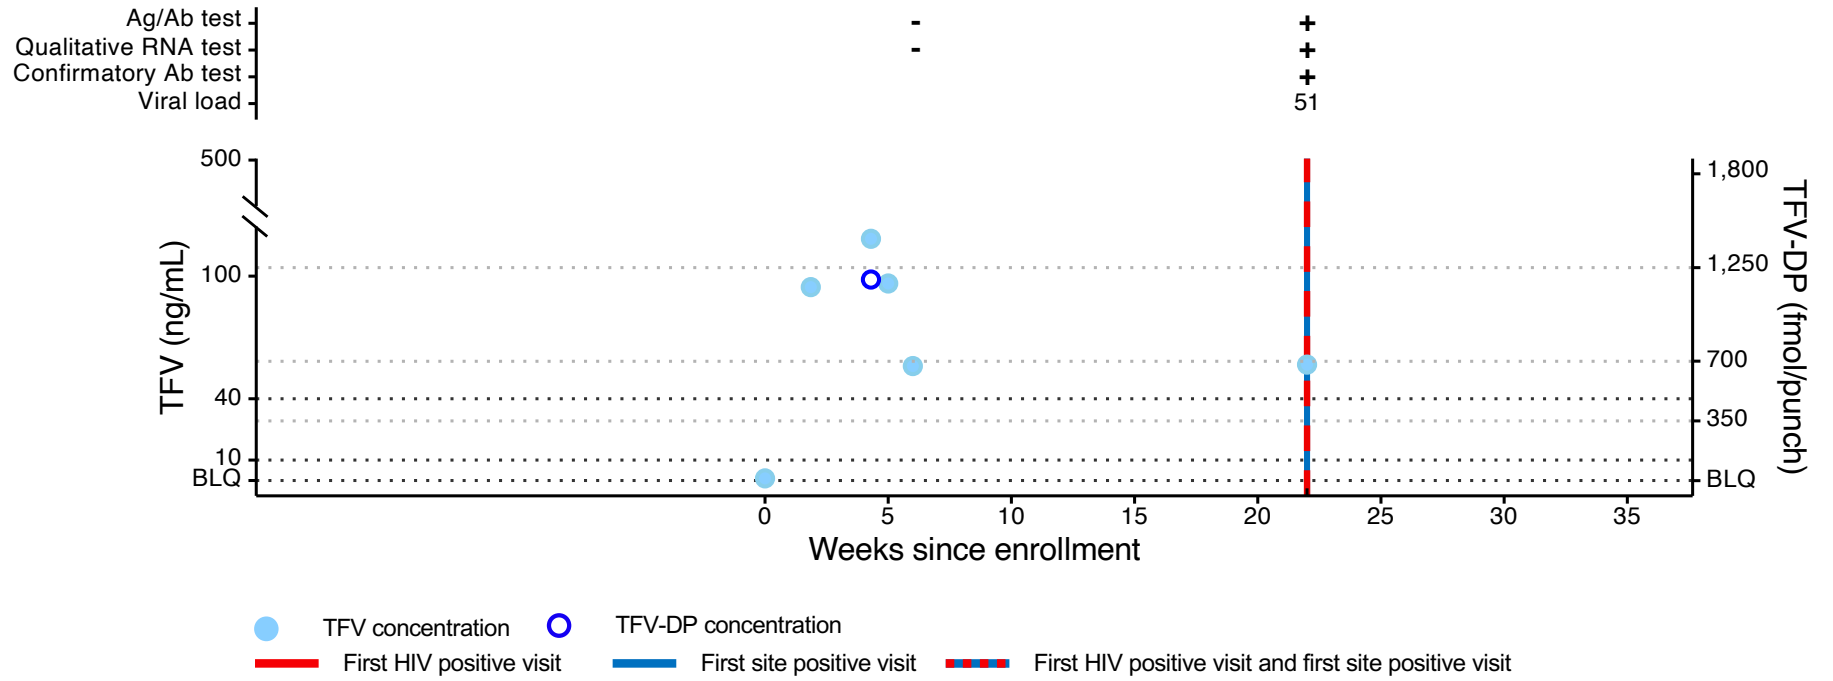

# Case E35

WT

Ag/Ab test  
Qualitative RNA test  
Confirmatory Ab test  
Viral load

- +  
- +  
- -  
204,580

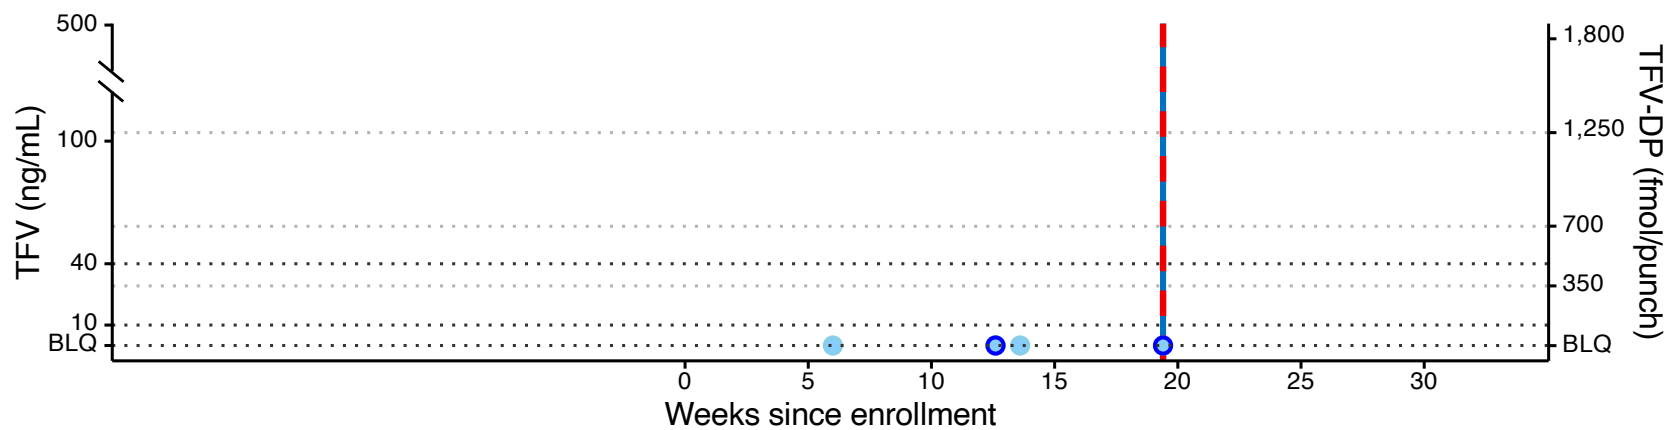

- TFV concentration
- TFV-DP concentration
- First HIV positive visit
- First site positive visit
- First HIV positive visit and first site positive visit

# Case E36

WT

Ag/Ab test  
Qualitative RNA test  
Confirmatory Ab test  
Viral load

ND  
14,886,030

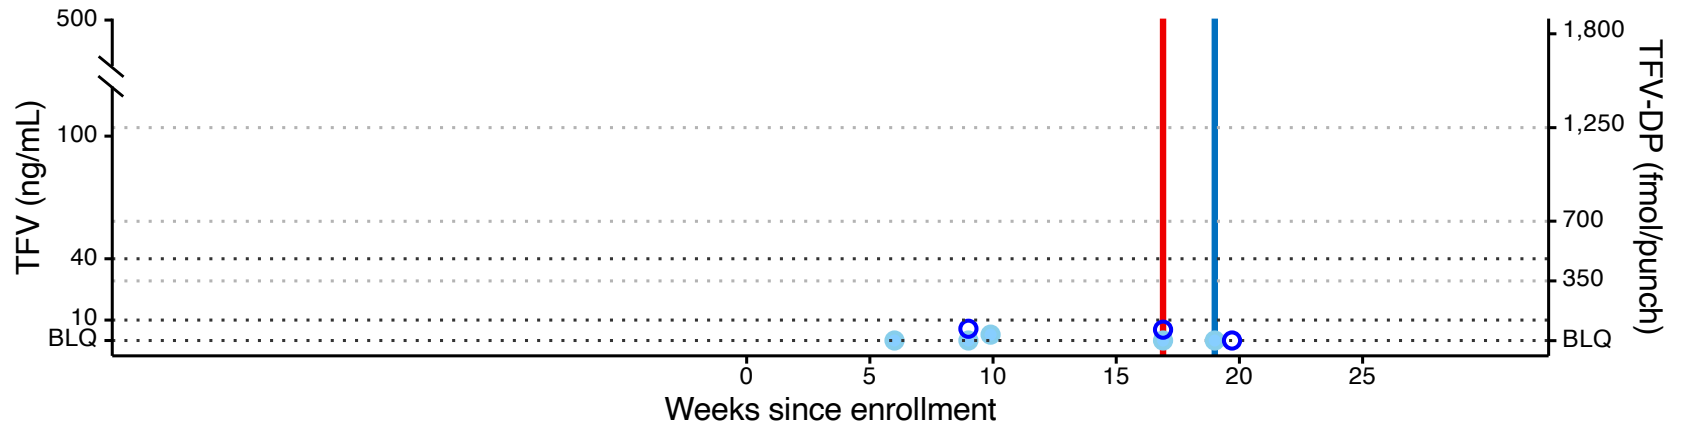

- TFV concentration
- TFV-DP concentration
- First HIV positive visit
- First site positive visit
- First HIV positive visit and first site positive visit

# Case E37

WT

Ag/Ab test  
Qualitative RNA test  
Confirmatory Ab test  
Viral load

-        +  
-        +  
+        +  
882,100

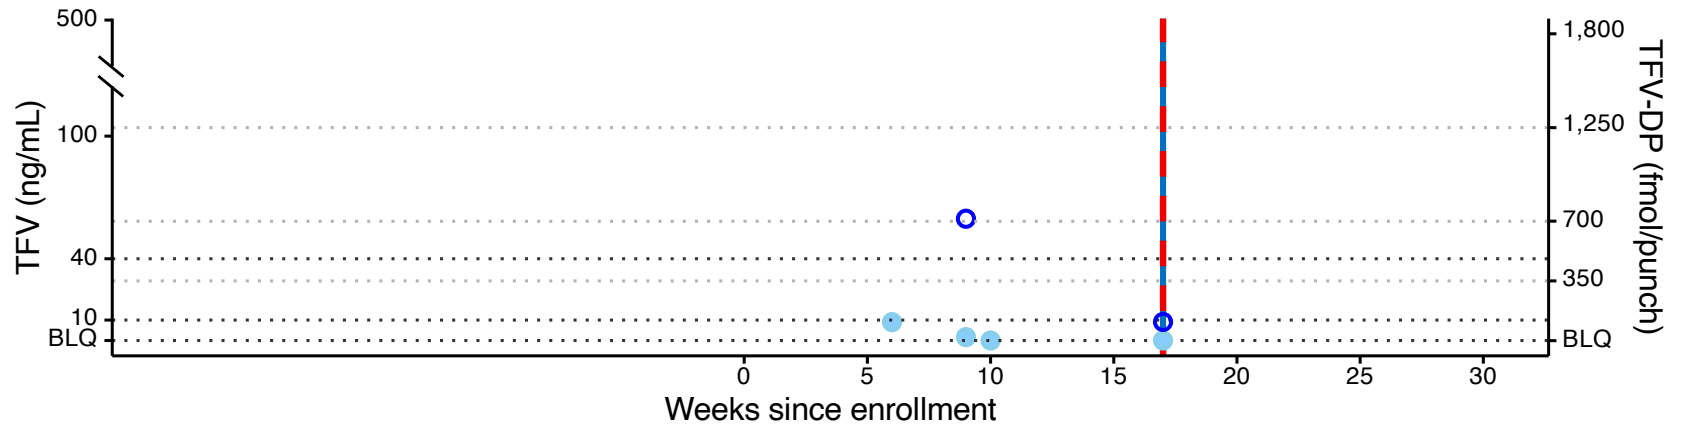

● TFV concentration    ○ TFV-DP concentration  
— First HIV positive visit    — First site positive visit    — First HIV positive visit and first site positive visit

# Case E38

WT

Ag/Ab test  
 Qualitative RNA test  
 Confirmatory Ab test  
 Viral load

-      +  
 -      +  
 +      2,110

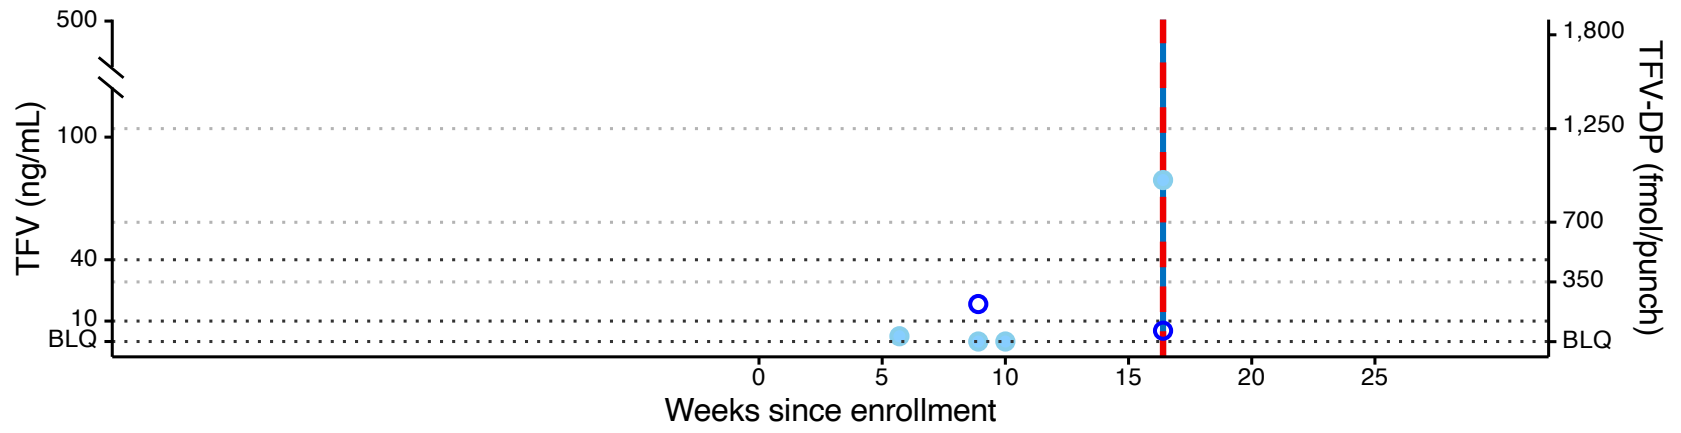

- TFV concentration
- TFV-DP concentration
- First HIV positive visit
- First site positive visit
- — First HIV positive visit and first site positive visit

# Case E39

K103S

Ag/Ab test  
Qualitative RNA test  
Confirmatory Ab test  
Viral load

- - +  
- ++  
-  
2,420  
1,943,850

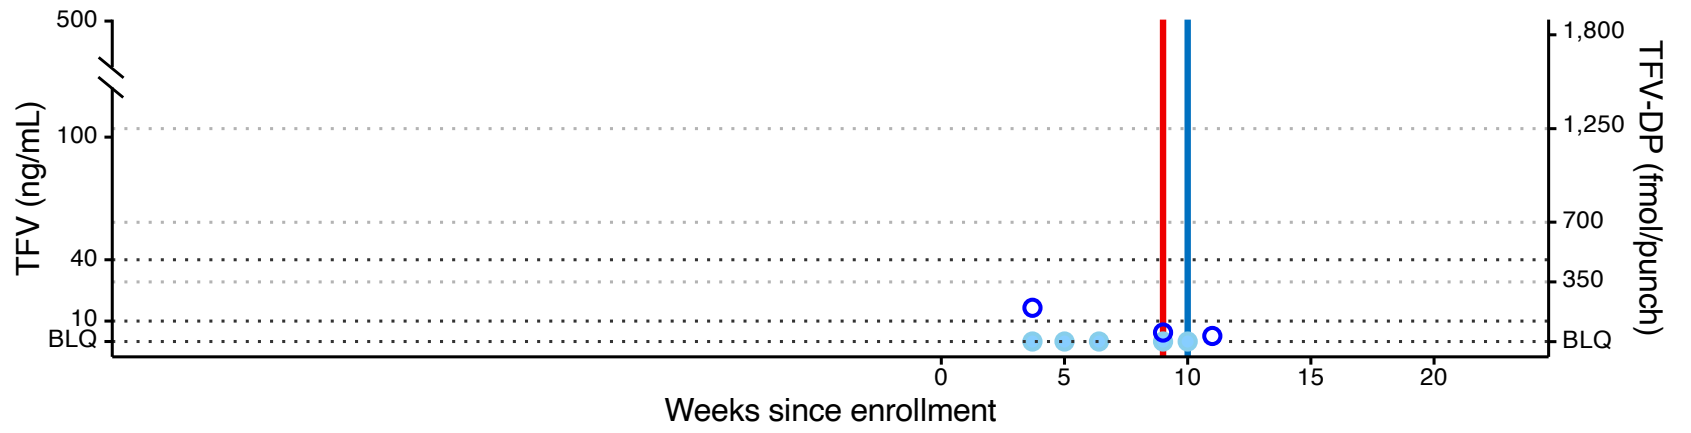

- TFV concentration
- TFV-DP concentration
- First HIV positive visit
- First site positive visit
- First HIV positive visit and first site positive visit

# Case E40

WT

|                      |     |    |       |        |
|----------------------|-----|----|-------|--------|
| Ag/Ab test           | -   | -  | -     | +      |
| Qualitative RNA test | +   | +  | +     | +      |
| Confirmatory Ab test |     |    |       | Ind    |
| Viral load           | 124 | ND | 2,930 | 13,169 |

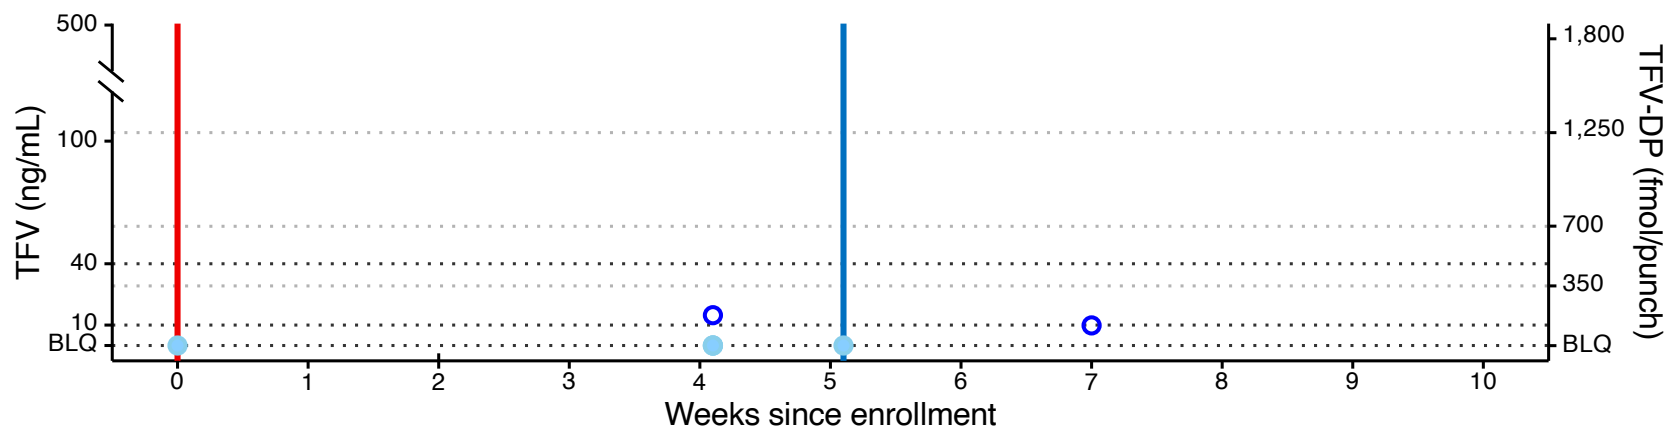

- TFV concentration
- TFV-DP concentration
- First HIV positive visit
- First site positive visit
- — First HIV positive visit and first site positive visit



# Case E41

|                      | WT    | M184I |       |
|----------------------|-------|-------|-------|
| Ag/Ab test           | -     | -     | +     |
| Qualitative RNA test | +     | +     | +     |
| Confirmatory Ab test |       |       | -     |
| Viral load           | 1,930 | 570   | 1,000 |

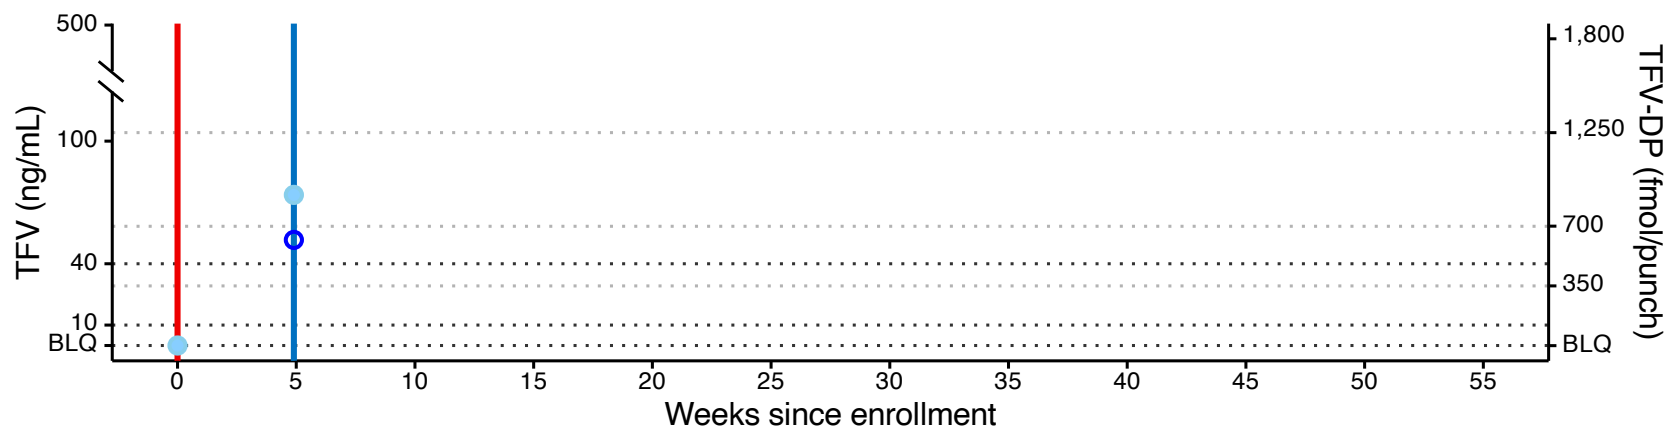

- TFV concentration
- TFV-DP concentration
- | First HIV positive visit
- | First site positive visit
- | | First HIV positive visit and first site positive visit

# Case E42

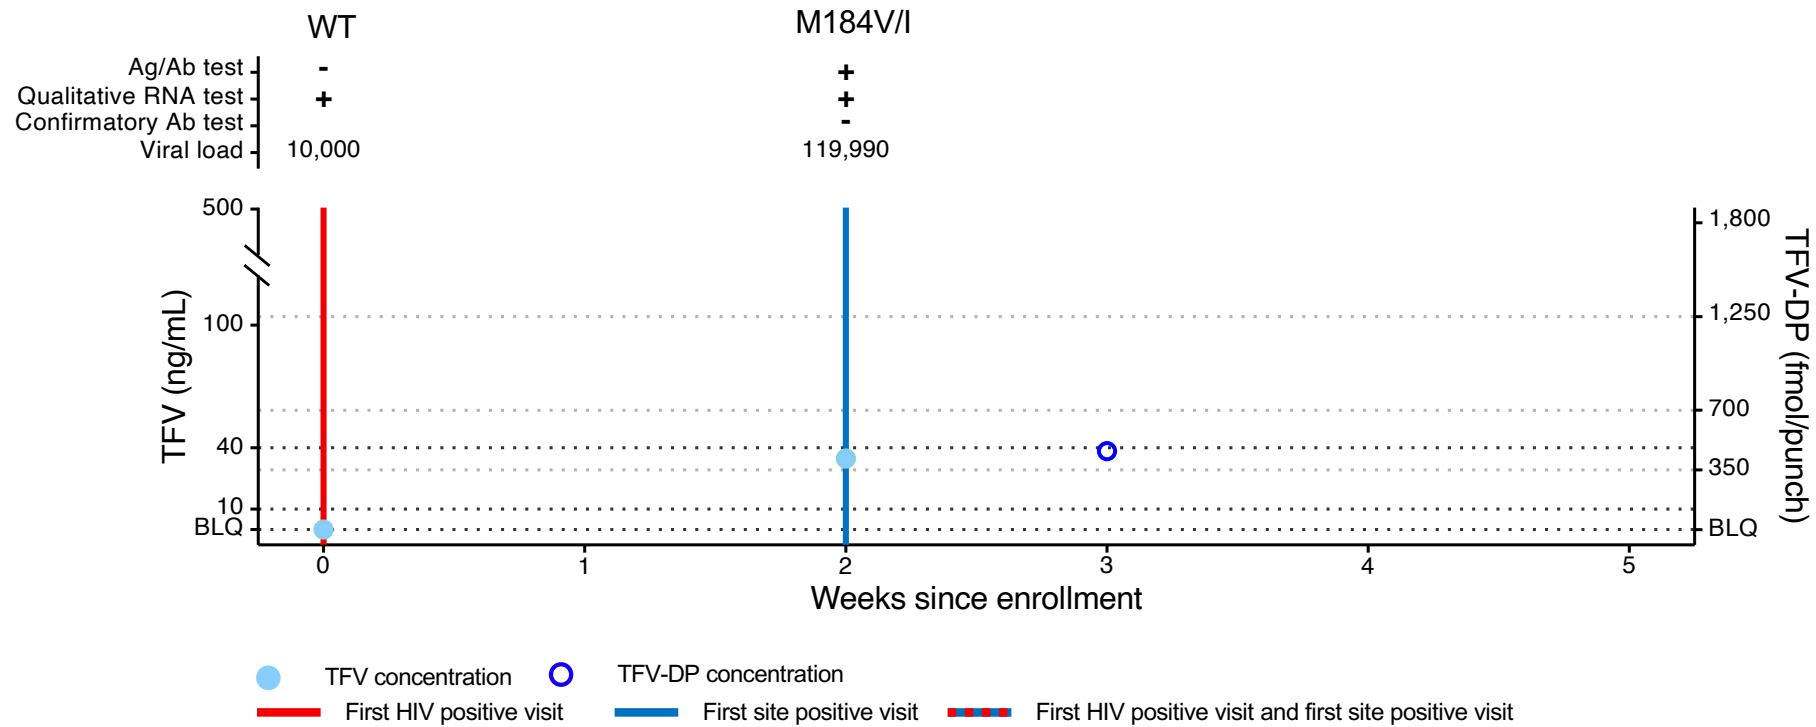

Supplement: jiab152_suppl_supplementary_appendix.pdf [file jiab152_suppl_supplementary_appendix.pdf]
